# Supplementary material for: The sunlight-promoted aerobic selective cyclization of olefinic amides and diselenides
Source: Royal Society of Chemistry journal article supplement (doi:10.1039/d0cy02273j), 2021-01-01

## Supporting information

Sunlight-promoted aerobic selective cyclization of olefinic amides and diselenides

Jiawei Hua,<sup>[a]</sup> Zheng Fang,<sup>[a]</sup> Mixue Bian,<sup>[a]</sup> Tao Ma,<sup>[a]</sup> Man Yang,<sup>[a]</sup> ChengKou Liu,<sup>[a]</sup> Wei He,<sup>[a]</sup> Zhao Yang,<sup>[b]</sup> Kai Guo\*<sup>[a][c]</sup>

<sup>a</sup>College of Biotechnology and Pharmaceutical Engineering, Nanjing Tech University, 30 Puzhu Rd S., Nanjing 211816, China. E-mail: guok@njtech.edu.cn; Fax: +86 2558139935; Tel: +86 2558139926

<sup>b</sup>College of Engineering, China Pharmaceutical University, 24 Tongjixiang, Nanjing 210003, China.

<sup>c</sup>State Key Laboratory of Materials-Oriented Chemical Engineering, Nanjing Tech University, 30 Puzhu Rd S., Nanjing 211816, China.

### Table of contents

|                                                                                        |    |
|----------------------------------------------------------------------------------------|----|
| 1. General information .....                                                           | 2  |
| 2. Reaction device.....                                                                | 2  |
| 3. Screening of photocatalysts for <i>O</i> -cyclization reaction .....                | 3  |
| 4. Screening of reaction conditions for the synthesis of product 4a <sup>a</sup> ..... | 3  |
| 5. X-ray crystallography structure of compound 3a and 4a .....                         | 4  |
| 6. General procedure for the derivatization of 3s .....                                | 4  |
| 7. HRMS Spectra .....                                                                  | 5  |
| 8. Fluorescence quenching experiments .....                                            | 5  |
| 9. Cyclic voltammetry experiment.....                                                  | 7  |
| 10. Analytical data of compounds 3, 4, 5.....                                          | 8  |
| 11. <sup>1</sup> H NMR, <sup>13</sup> C NMR and <sup>19</sup> F NMR spectra.....       | 24 |

## 1. General information

Unless otherwise indicated, all the reagents and solvents were purchased from commercial suppliers and used without any further purification.  $^1\text{H}$  spectra were recorded in  $\text{CDCl}_3$  on 400MHz NMR spectrometers and resonances ( $\bullet$ ) are given in parts per million relative to tetramethylsilane. Data are reported as follows: chemical shift, multiplicity (s = singlet, d = doublet, t = triplet, q = quartet, p = penta, dd = doublet of doublets, dt = doublet of triplets, ddt = doublet of doublet of triplets, dtd = doublet of triplet of doublets, m = multiplet, br = broad), coupling constant (J) in Hertz (Hz), and integration.  $^{13}\text{C}$  NMR were recorded at 100 MHz and chemical data for carbons are reported in parts per million (ppm,  $\delta$  scale) downfield from tetramethylsilane and are referenced to the carbon resonance of the solvent. Column chromatography was generally performed on Silicycle silica gel (200-300 mesh). Analytical thin-layer chromatography (TLC) was performed on 0.2 mm coated silica gel plates (HSGF 254) and visualized the course of the reactions using a UV light (254 nm or 365 nm). High-resolution mass spectra (HRMS) were obtained on an Agilent mass spectrometer using ESI-TOF (electrosprayionization-time of flight).

## 2. Reaction device

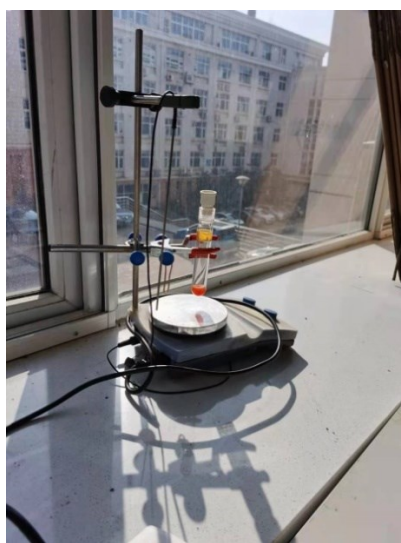

**Figure S0.** Reaction device

### 3. Screening of reaction conditions for O-cyclization reaction

**Table S0.** Screening of reaction conditions for the synthesis of product **3a**<sup>a</sup>

| Entry | Photocatalyst            | Yield <sup>b</sup> (%) |
|-------|--------------------------|------------------------|
| 1     | -                        | <b>80</b>              |
| 2     | Na <sub>2</sub> -Eosin Y | 74                     |
| 3     | Eosin Y                  | 70                     |
| 4     | Acid Red 94              | 66                     |
| 5     | Fluorescein              | 61                     |
| 6     | -                        | 52 <sup>c</sup>        |
| 7     | -                        | 73 <sup>d</sup>        |
| 8     | -                        | 76 <sup>e</sup>        |

<sup>a</sup>Reaction conditions: **1a** (0.3 mmol), **2a** (0.3 mmol), Photocatalyst (2 mol%), TFA (0.2 equiv., 0.06 mmol), CH<sub>3</sub>CN (2.5 mL), sunlight, room temperature, air, 3h. <sup>b</sup>Isolated yields. <sup>c</sup>0.5 equiv. of **2a**. <sup>d</sup>0.75 equiv. of **2a**. <sup>e</sup>1.5 equiv. of **2a**.

### 4. Screening of reaction conditions for the synthesis of product **4a**<sup>a</sup>

**Table S1.** Screening of reaction conditions for the synthesis of product **4a**<sup>a</sup>

| Entry | Photocatalyst (equiv.)             | Solvent            | Yield <sup>b</sup> (%) |
|-------|------------------------------------|--------------------|------------------------|
| 1     | Na <sub>2</sub> -Eosin Y (2 mol%)  | CH <sub>3</sub> CN | <b>54</b>              |
| 2     | Na <sub>2</sub> -Eosin Y (1 mol%)  | CH <sub>3</sub> CN | 36                     |
| 3     | Na <sub>2</sub> -Eosin Y (5 mol%)  | CH <sub>3</sub> CN | 47                     |
| 4     | Na <sub>2</sub> -Eosin Y (10 mol%) | CH <sub>3</sub> CN | 40                     |
| 5     | Na <sub>2</sub> -Eosin Y (2 mol%)  | DCE                | 22                     |
| 6     | Na <sub>2</sub> -Eosin Y (2 mol%)  | DMF                | 28                     |
| 7     | Na <sub>2</sub> -Eosin Y (2 mol%)  | DMSO               | trace                  |
| 8     | Na <sub>2</sub> -Eosin Y (2 mol%)  | 1,4-Dioxane        | 21                     |
| 9     | Na <sub>2</sub> -Eosin Y (2 mol%)  | THF                | trace                  |
| 10    | Na <sub>2</sub> -Eosin Y (2 mol%)  | CH <sub>3</sub> CN | 50 <sup>c</sup>        |
| 11    | Na <sub>2</sub> -Eosin Y (2 mol%)  | CH <sub>3</sub> CN | 46 <sup>d</sup>        |
| 12    | Na <sub>2</sub> -Eosin Y (2 mol%)  | CH <sub>3</sub> CN | 41 <sup>e</sup>        |
| 13    | Na <sub>2</sub> -Eosin Y (2 mol%)  | CH <sub>3</sub> CN | 30 <sup>f</sup>        |
| 14    | Na <sub>2</sub> -Eosin Y (2 mol%)  | CH <sub>3</sub> CN | 45 <sup>g</sup>        |
| 15    | Na <sub>2</sub> -Eosin Y (2 mol%)  | CH <sub>3</sub> CN | 51 <sup>h</sup>        |

<sup>a</sup>Reaction conditions: **1a** (0.3 mmol), **2a** (0.3 mmol), Na<sub>2</sub>-Eosin Y (equiv.), Na<sub>2</sub>CO<sub>3</sub> (1 equiv.), solvent (2.5 mL), sunlight, room temperature, air, 3h. <sup>b</sup>Isolated yields. <sup>c</sup>Blue. <sup>d</sup>White. <sup>e</sup>Green. <sup>f</sup>0.5 equiv. of **2a**. <sup>g</sup>0.75 equiv. of **2a**. <sup>h</sup>1.5 equiv. of **2a**.

## 5. X-ray crystallography structure of compound **3a** and **4a**

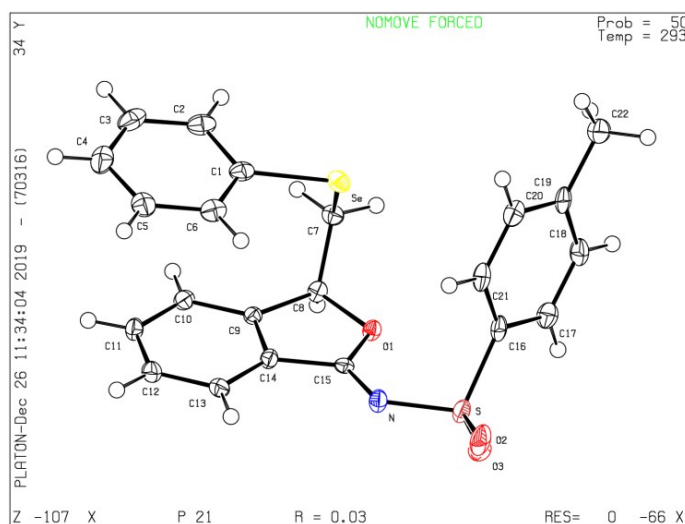

**Figure S1.** X-ray structure of **3a**

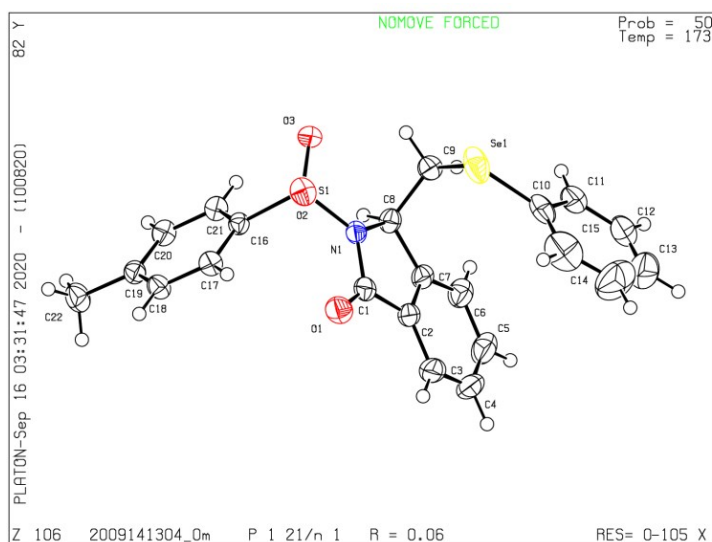

**Figure S2.** X-ray structure of **4a**

## 6. General procedure for the derivatization of **3s**

A 35 mL glass tube was charged with substrate **3s** (0.5 mmol), 2M HCl (2mL), CH<sub>3</sub>CN (4 mL) and a magnetic stir bar. The reaction mixture was stirred at room



temperature for overnight. After completing reaction, it was monitored with TLC. Then the reaction mixture was washed with saturated NaCl solution and extracted with ethyl acetate. The organic layer was dried with anhydrous sodium sulfate and the solvent was removed under vacuum. The pure product **5** was obtained by flash chromatography on silica gel using petroleum ether and ethyl acetate as the eluent.

## 7. HRMS Spectra

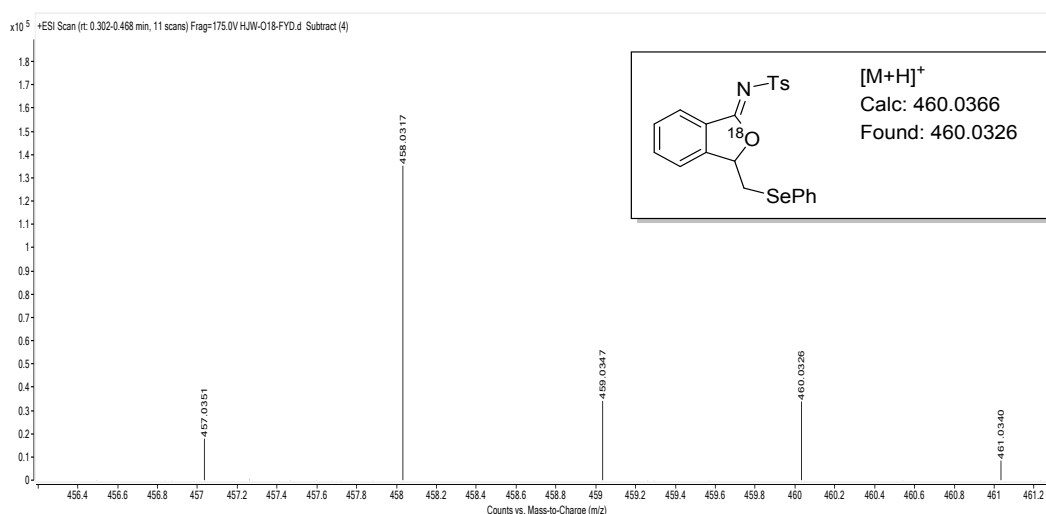

Figure S3-1. HRMS Spectra for compound **18O-3a**

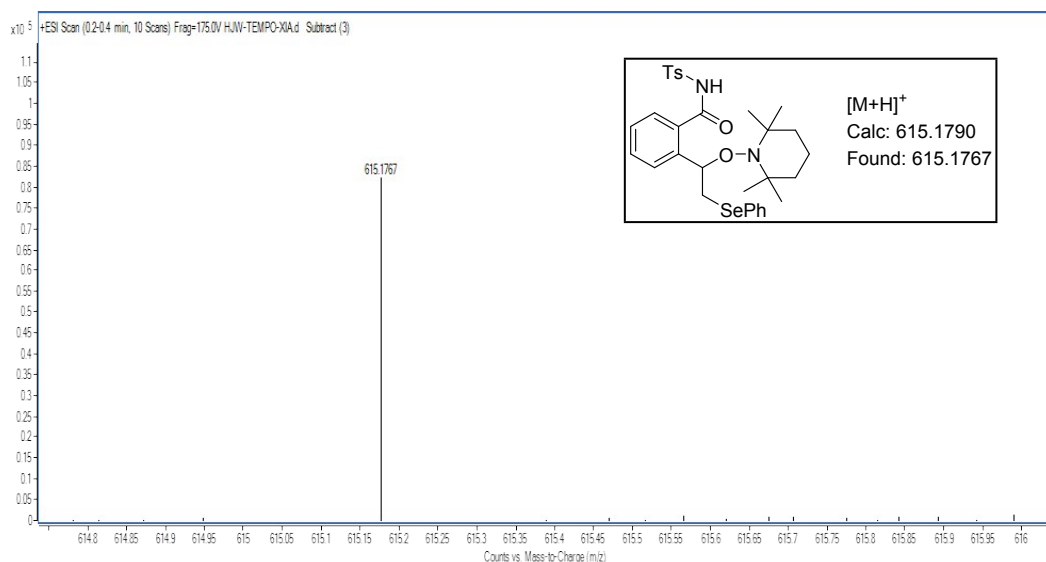

Figure S3-2. HRMS Spectra for compound **6**

## 8. Fluorescence quenching experiments

The fluorescence emission intensities were recorded on a spectrofluorimeter. The

excitation wavelength was fixed at 525 nm. In a typical experiment, the emission spectrum of a 0.1 mM solution of PC in CH<sub>3</sub>CN was collected. Then, different amount of **1a** or **2a** was added to the measured solution and the emission spectrum of the sample was collected. Here  $I_0$  and  $I$  represent the intensities of the emission in the absence and presence of the quencher.

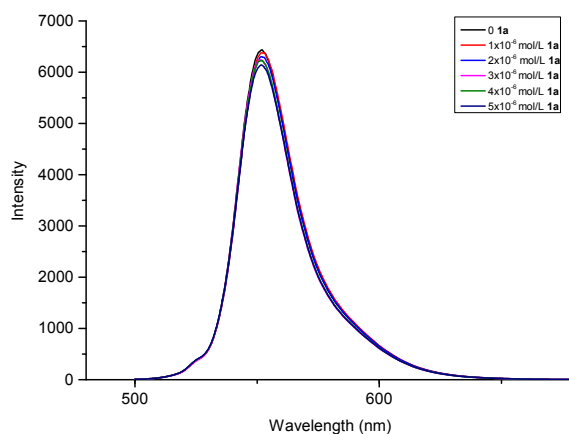

**Figure S4.** Quenching of Na<sub>2</sub>-EosinY fluorescence emission in the presence of **1a**

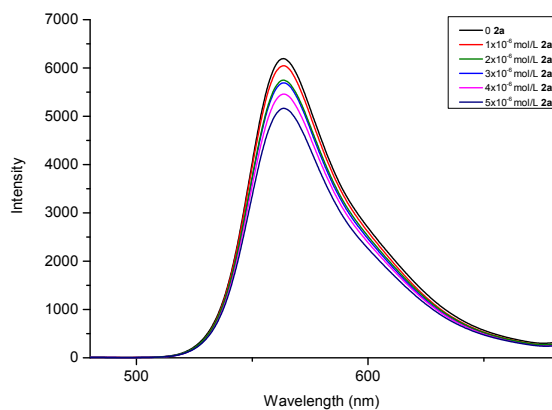

**Figure S5.** Quenching of Na<sub>2</sub>-EosinY fluorescence emission in the presence of **2a**

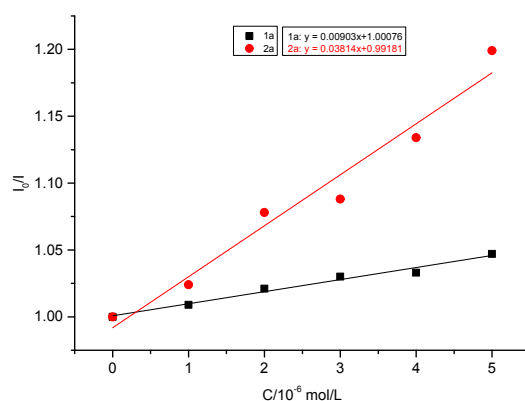

Figure S6. Stern-volmer plots

## 9. Cyclic voltammetry experiment

Cyclic voltammograms of diphenyl diselenide and Na<sub>2</sub>-EosinY were performed in a three-electrode cell connected to a schlenk line under nitrogen at room temperature. The working electrode was a steady glassy carbon disk electrode while the counter electrode was a platinum wire. The reference was an Ag/AgCl electrode submerged in saturated aqueous KCl solution. (1) Diphenyl diselenide (0.3mmol) and a solvent (MeCN, 20 mL) containing <sup>n</sup>Bu<sub>4</sub>NBF<sub>4</sub> (0.3 mmol) were poured into the electrochemical cell in cyclic voltammetry experiments. The scan rate was 0.10 V/s, ranging from 0 V to 2.5 V, -2.5 V to 0 V. (2) Na<sub>2</sub>-EosinY (0.006mmol) and a solvent (MeCN, 20 mL) containing <sup>n</sup>Bu<sub>4</sub>NBF<sub>4</sub> (0.3 mmol) were poured into the electrochemical cell in cyclic voltammetry experiments. The scan rate was 0.10 V/s, ranging from 0 V to 2.5 V, -2.5 V to 0 V.

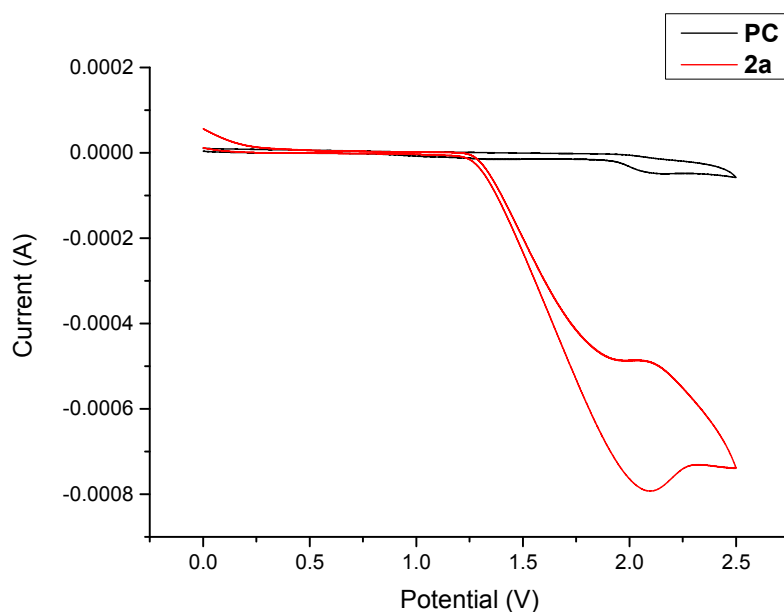

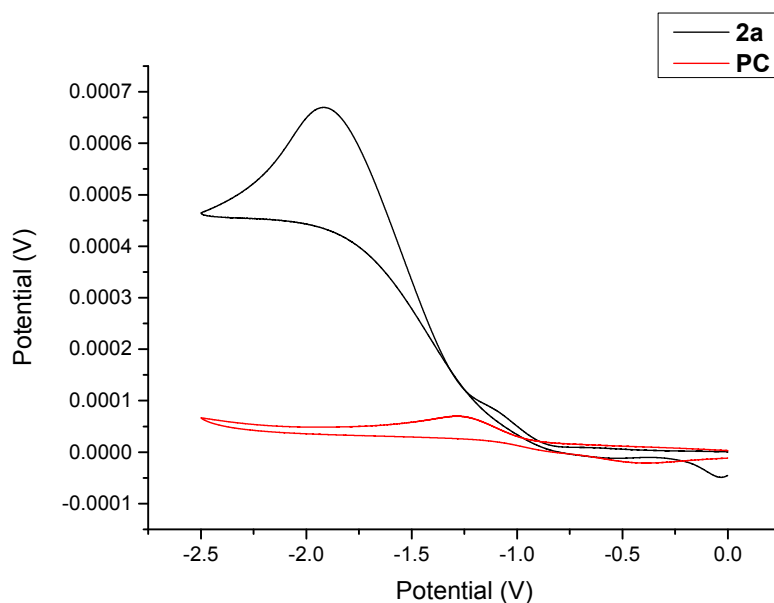

Figure S7. Cyclic voltammograms of PC and **2a**

## 10. Analytical data of compounds **3**, **4**, **5**

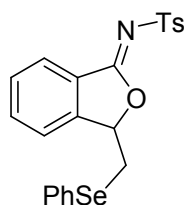

(Z)-4-methyl-N-(3-((phenylselanyl)methyl)isobenzofuran-1(3H)-ylidene)benzenesulfonamide (**3a**). White solid (80%, 0.110g).  $^1\text{H}$  NMR (400 MHz, Chloroform-*d*)  $\delta$  7.94 – 7.88 (m, 2H), 7.81 (d,  $J$  = 6.7 Hz, 1H), 7.44 – 7.37 (m, 2H), 7.33 (dd,  $J$  = 6.2, 1.8 Hz, 1H), 7.31 – 7.26 (m, 2H), 7.22 (d,  $J$  = 8.1 Hz, 2H), 7.19 – 7.15 (m, 1H), 7.15 – 7.09 (m, 2H), 5.79 (dd,  $J$  = 6.4, 4.8 Hz, 1H), 3.31 (dd,  $J$  = 13.3, 4.7 Hz, 1H), 3.14 (dd,  $J$  = 13.3, 6.6 Hz, 1H), 2.33 (s, 3H).  $^{13}\text{C}$  NMR (101 MHz, Chloroform-*d*)  $\delta$  166.04, 145.43, 142.46, 137.18, 133.17, 132.78, 128.79, 128.26, 128.16, 127.49, 126.91, 126.82, 124.40, 121.12, 85.07, 30.27, 20.59. HRMS (TOF)  $m/z$   $[\text{M} + \text{H}]^+$  Calcd for  $\text{C}_{22}\text{H}_{20}\text{NO}_3\text{SSe}$  458.0324 found 458.0328.

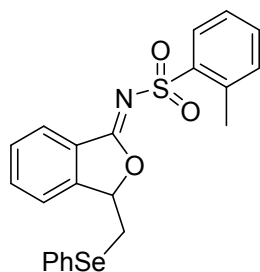

(Z)-2-methyl-N-(3-((phenylselanyl)methyl)isobenzofuran-1(3H)-ylidene)benzenesulfonamide (**3b**). White solid (75%, 0.103g).  $^1\text{H}$  NMR (400 MHz, Chloroform-*d*)  $\delta$  8.11 (dd,  $J$  = 7.9, 1.2 Hz, 1H), 7.83 (d,  $J$  = 5.2 Hz, 1H), 7.45 – 7.40 (m, 2H), 7.37 (ddt,  $J$  = 7.5, 5.5, 1.5 Hz, 2H), 7.30 – 7.20 (m, 4H), 7.18 – 7.15 (m, 1H), 7.15 – 7.09 (m, 2H), 5.78 (dd,  $J$  = 7.0, 4.2 Hz, 1H), 3.34 (dd,  $J$  = 13.3, 4.2 Hz, 1H),

3.08 (dd,  $J = 13.3, 7.0$  Hz, 1H), 2.67 (s, 3H).  $^{13}\text{C}$  NMR (101 MHz, Chloroform-*d*)  $\delta$  166.13, 145.58, 138.79, 136.88, 133.14, 132.82, 131.58, 131.07, 128.83, 128.36, 128.26, 127.86, 127.43, 126.92, 124.65, 124.26, 121.26, 84.98, 30.19, 19.68. HRMS (TOF)  $m/z$   $[\text{M} + \text{H}]^+$  Calcd for  $\text{C}_{22}\text{H}_{20}\text{NO}_3\text{SSe}$  458.0324 found 458.0322.

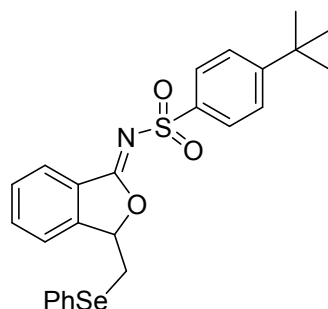

(*Z*)-4-(tert-butyl)-*N*-(3-((phenylselanyl)methyl)isobenzofuran-1(3H)-ylidene)benzenesulfonamide (**3c**). White solid (78%, 0.117g).  $^1\text{H}$  NMR (400 MHz, Chloroform-*d*)  $\delta$  7.96 (d,  $J = 8.3$  Hz, 2H), 7.87 – 7.79 (m, 1H), 7.47 – 7.37 (m, 4H), 7.35 – 7.26 (m, 3H), 7.15 (dq,  $J = 14.7, 7.2, 6.4$  Hz, 3H), 5.79 (t,  $J = 5.6$  Hz, 1H), 3.29 (dd,  $J = 13.3, 4.5$  Hz, 1H), 3.13 (dd,  $J = 13.3, 6.7$  Hz, 1H), 1.26 (s, 9H).  $^{13}\text{C}$  NMR (101 MHz, Chloroform-*d*)  $\delta$  166.01, 155.39, 145.47, 137.16, 133.13, 132.83, 128.78, 128.34, 128.27, 127.53, 126.92, 126.64, 124.55, 124.45, 121.12, 85.04, 34.11, 30.25, 30.11. HRMS (TOF)  $m/z$   $[\text{M} + \text{H}]^+$  Calcd for  $\text{C}_{25}\text{H}_{26}\text{NO}_3\text{SSe}$  500.0793 found 500.0797.

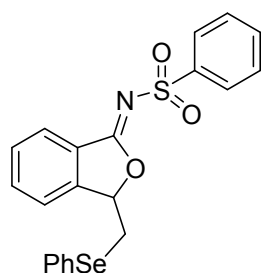

(*Z*)-*N*-(3-((phenylselanyl)methyl)isobenzofuran-1(3H)-ylidene)benzenesulfonamide (**3d**). White solid (77%, 0.102g).  $^1\text{H}$  NMR (400 MHz, Chloroform-*d*)  $\delta$  8.06 – 8.00 (m, 2H), 7.83 (d,  $J = 7.1$  Hz, 1H), 7.52 – 7.47 (m, 1H), 7.46 – 7.38 (m, 4H), 7.34 (dd,  $J = 5.8, 2.3$  Hz, 1H), 7.31 – 7.26 (m, 2H), 7.20 – 7.10 (m, 3H), 5.79 (dd,  $J = 6.5, 4.8$  Hz, 1H), 3.30 (dd,  $J = 13.3, 4.6$  Hz, 1H), 3.12 (dd,  $J = 13.3, 6.7$  Hz, 1H).  $^{13}\text{C}$  NMR (101 MHz, Chloroform-*d*)  $\delta$  167.28, 146.59, 141.30, 134.31, 133.84, 132.70, 129.88, 129.33, 129.28, 128.61, 128.54, 127.98, 127.76, 125.52, 122.21, 86.25, 31.25. HRMS (TOF)  $m/z$   $[\text{M} + \text{H}]^+$  Calcd for  $\text{C}_{21}\text{H}_{18}\text{NO}_3\text{SSe}$  444.0167 found 444.0162.

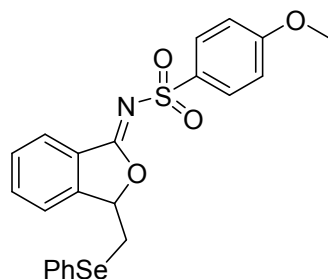

(*Z*)-4-methoxy-*N*-(3-((phenylselanyl)methyl)isobenzofuran-1(3H)-ylidene)benzenesulfonamide (**3e**). White solid (75%, 0.106g).  $^1\text{H}$  NMR (400 MHz, Chloroform-*d*)  $\delta$  8.07 – 8.01 (m, 2H), 7.90 – 7.82 (m, 1H), 7.48 – 7.42 (m, 2H), 7.38 – 7.28 (m, 3H), 7.25 – 7.13 (m, 3H), 6.99 – 6.93 (m, 2H),

5.89 (t,  $J = 5.3$  Hz, 1H), 3.82 (s, 3H), 3.35 (dd,  $J = 13.4, 4.8$  Hz, 1H), 3.27 (dd,  $J = 13.4, 6.0$  Hz, 1H).  $^{13}\text{C}$  NMR (101 MHz, Chloroform- $d$ )  $\delta$  166.96, 163.04, 146.41, 134.27, 133.68, 132.87, 130.04, 129.83, 129.25, 128.73, 127.83, 125.23, 122.20, 113.80, 86.23, 55.69, 31.48. HRMS (TOF)  $m/z$   $[\text{M} + \text{H}]^+$  Calcd for  $\text{C}_{22}\text{H}_{20}\text{NO}_4\text{SSe}$  474.0273 found 474.0279.

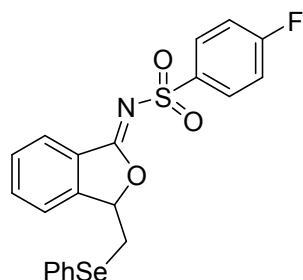

(Z)-4-fluoro-N-(3-((phenylselanyl)methyl)isobenzofuran-1(3H)-ylidene)benzenesulfonamide (**3f**). White solid (79%, 0.109g).  $^1\text{H}$  NMR (400 MHz, Chloroform- $d$ )  $\delta$  8.02 (ddd,  $J = 10.0, 5.1, 2.5$  Hz, 2H), 7.81 – 7.71 (m, 1H), 7.42 – 7.35 (m, 2H), 7.30 – 7.25 (m, 1H), 7.24 – 7.19 (m, 2H), 7.16 – 7.03 (m, 5H), 5.82 (t,  $J = 5.4$  Hz, 1H), 3.28 (dd,  $J = 13.4, 4.7$  Hz, 1H), 3.18 (dd,  $J = 13.5, 6.1$  Hz, 1H).  $^{13}\text{C}$  NMR (101 MHz, Chloroform- $d$ )  $\delta$  166.49, 164.11 (d,  $J = 252$  Hz), 145.51, 136.27 (d,  $J = 3$  Hz), 133.44, 132.70, 129.56 (d,  $J = 9$  Hz), 128.88, 128.24, 128.02, 127.51, 126.88, 124.32, 121.17, 114.77 (d,  $J = 23$  Hz), 85.43, 30.34.  $^{19}\text{F}$  NMR (376 MHz, Chloroform- $d$ )  $\delta$  -105.29. HRMS (TOF)  $m/z$   $[\text{M} + \text{H}]^+$  Calcd for  $\text{C}_{21}\text{H}_{17}\text{FNO}_3\text{SSe}$  462.0073 found 462.0070.

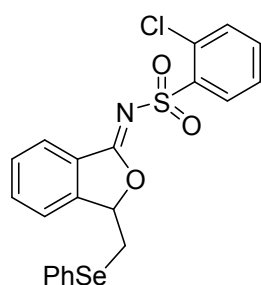

(Z)-2-chloro-N-(3-((phenylselanyl)methyl)isobenzofuran-1(3H)-ylidene)benzenesulfonamide (**3g**). White solid (73%, 0.105g).  $^1\text{H}$  NMR (400 MHz, Chloroform- $d$ )  $\delta$  8.19 (d,  $J = 7.6$  Hz, 1H), 7.83 (s, 1H), 7.45 – 7.38 (m, 4H), 7.38 – 7.32 (m, 2H), 7.29 – 7.25 (m, 2H), 7.18 – 7.08 (m, 3H), 5.77 (dd,  $J = 6.6, 4.6$  Hz, 1H), 3.30 (dd,  $J = 13.3, 4.5$  Hz, 1H), 3.08 (dd,  $J = 13.3, 6.8$  Hz, 1H).  $^{13}\text{C}$  NMR (101 MHz, Chloroform- $d$ )  $\delta$  167.44, 146.71, 139.40, 134.44, 133.81, 133.52, 132.75, 131.60, 130.54, 129.96, 129.31, 129.13, 128.50, 127.94, 126.72, 125.55, 122.27, 86.39, 31.11. HRMS (TOF)  $m/z$   $[\text{M} + \text{H}]^+$  Calcd for  $\text{C}_{21}\text{H}_{17}\text{ClNO}_3\text{SSe}$  477.9777 found 477.9770.

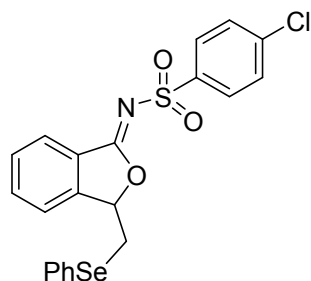

(Z)-4-chloro-N-(3-((phenylselanyl)methyl)isobenzofuran-1(3H)-ylidene)benzenesulfonamide (**3h**). White solid (80%, 0.114g).  $^1\text{H}$  NMR (400 MHz, Chloroform- $d$ )  $\delta$  8.00 – 7.94 (m, 2H), 7.83 (d,  $J = 7.1$  Hz, 1H), 7.48 – 7.38 (m, 4H), 7.38 – 7.34 (m, 1H), 7.34 – 7.28 (m, 2H), 7.20 – 7.11 (m, 3H), 5.82 (dd,  $J = 6, 5.2$  Hz, 1H), 3.33 (dd,  $J = 13.3, 4.8$  Hz, 1H), 3.18 (dd,  $J = 13.3, 6.5$  Hz, 1H).  $^{13}\text{C}$  NMR (101

MHz, Chloroform-*d*)  $\delta$  166.44 , 145.63 , 138.81 , 138.12 , 133.43 , 132.87 , 128.93 , 128.35 , 128.28 , 128.12 , 127.86 , 127.40 , 127.03 , 124.54 , 121.15 , 85.39 , 30.21 . HRMS (TOF)  $m/z$   $[M + H]^+$  Calcd for  $C_{21}H_{17}ClNO_3SSe$  477.9777 found 477.9772.

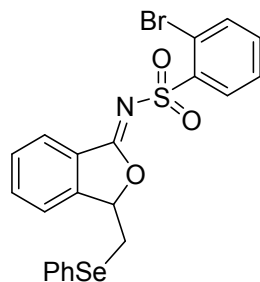

(Z)-2-bromo-N-(3-((phenylselanyl)methyl)isobenzofuran-1(3H)-ylidene)benzenesulfonamide (**3i**). White solid (74%, 0.115g).  $^1H$  NMR (400 MHz, Chloroform-*d*)  $\delta$  8.27 – 8.19 (m, 1H), 7.86 (d,  $J$  = 6.8 Hz, 1H), 7.64 (d,  $J$  = 7.8 Hz, 1H), 7.42 (dq,  $J$  = 20.8, 6.7, 6.3 Hz, 4H), 7.31 (dd,  $J$  = 10.9, 7.5 Hz, 3H), 7.15 (dq,  $J$  = 14.3, 6.8 Hz, 3H), 5.78 (dd,  $J$  = 6, 4.8 Hz, 1H), 3.32 (dd,  $J$  = 13.3, 4.4 Hz, 1H), 3.09 (dd,  $J$  = 13.3, 6.9 Hz, 1H).  $^{13}C$  NMR (101 MHz, Chloroform-*d*)  $\delta$  166.32 , 145.71 , 140.17 , 134.06 , 133.37 , 132.79 , 132.41 , 129.69 , 128.93 , 128.30 , 128.16 , 127.47 , 126.92 , 126.27 , 124.57 , 121.23 , 119.87 , 85.35 , 30.07 . HRMS (TOF)  $m/z$   $[M + H]^+$  Calcd for  $C_{21}H_{17}BrNO_3SSe$  521.9272 found 521.9278.

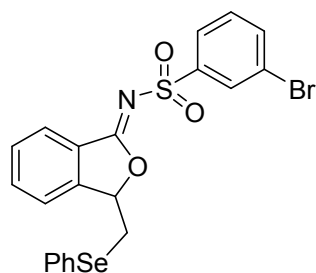

(Z)-3-bromo-N-(3-((phenylselanyl)methyl)isobenzofuran-1(3H)-ylidene)benzenesulfonamide (**3j**). White solid (73%, 0.114g).  $^1H$  NMR (400 MHz, Chloroform-*d*)  $\delta$  8.24 (t,  $J$  = 1.8 Hz, 1H), 8.03 (ddd,  $J$  = 7.9, 1.6, 1.0 Hz, 1H), 7.86 (dd,  $J$  = 6.1, 2.5 Hz, 1H), 7.67 (ddd,  $J$  = 8.0, 1.9, 1.0 Hz, 1H), 7.50 – 7.44 (m, 2H), 7.40 (d,  $J$  = 7.9 Hz, 1H), 7.37 – 7.33 (m, 1H), 7.31 – 7.27 (m, 2H), 7.23 – 7.18 (m, 1H), 7.18 – 7.12 (m, 2H), 5.93 (t,  $J$  = 5.2 Hz, 1H), 3.38 (dd,  $J$  = 13.5, 4.6 Hz, 1H), 3.28 (dd,  $J$  = 13.5, 6.0 Hz, 1H).  $^{13}C$  NMR (101 MHz, Chloroform-*d*)  $\delta$  167.95 , 146.64 , 143.01 , 135.75 , 134.64 , 133.67 , 130.74 , 130.37 , 129.97 , 129.27 , 128.91 , 128.62 , 127.88 , 126.42 , 125.35 , 122.45 , 122.28 , 86.64 , 31.39 . HRMS (TOF)  $m/z$   $[M + H]^+$  Calcd for  $C_{21}H_{17}BrNO_3SSe$  521.9272 found 521.9280.

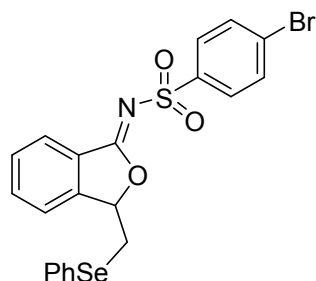

(Z)-4-bromo-N-(3-((phenylselanyl)methyl)isobenzofuran-1(3H)-ylidene)benzenesulfonamide (**3k**). White solid (79%, 0.124g).  $^1H$  NMR (400 MHz, Chloroform-*d*)  $\delta$  7.92 – 7.87 (m, 2H), 7.82 (d,  $J$  = 7.1 Hz, 1H), 7.60 – 7.54 (m, 2H), 7.43 (tt,  $J$  = 7.3, 3.8 Hz, 2H), 7.38 – 7.34 (m, 1H), 7.34 – 7.29 (m, 2H), 7.22 – 7.11 (m, 3H), 5.81 (dd,  $J$  = 6.4, 4.8 Hz, 1H), 3.32 (dd,  $J$  = 13.3, 4.8 Hz, 1H), 3.18 (dd,  $J$  = 13.3,

6.5 Hz, 1H).  $^{13}\text{C}$  NMR (101 MHz, Chloroform-*d*)  $\delta$  166.47 , 145.63 , 139.34 , 133.45 , 132.87 , 130.85 , 128.93 , 128.39 , 128.34 , 128.10 , 127.41 , 127.02 , 126.65 , 124.53 , 121.15 , 85.41 , 30.22 . HRMS (TOF)  $m/z$   $[\text{M} + \text{H}]^+$  Calcd for  $\text{C}_{21}\text{H}_{17}\text{BrNO}_3\text{Sse}$  521.9272 found 521.9275.

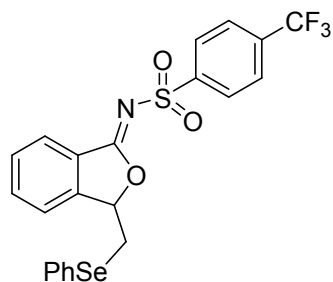

(Z)-N-(3-((phenylselanyl)methyl)isobenzofuran-1(3H)-ylidene)-4-(trifluoromethyl)benzenesulfonamide (**3l**). White solid (69%, 0.106g).  $^1\text{H}$  NMR (400 MHz, Chloroform-*d*)  $\delta$  8.12 (d,  $J$  = 8.2 Hz, 2H), 7.78 – 7.72 (m, 1H), 7.65 (d,  $J$  = 8.4 Hz, 2H), 7.39 – 7.32 (m, 2H), 7.27 – 7.21 (m, 1H), 7.19 – 7.14 (m, 2H), 7.11 – 7.06 (m, 1H), 7.05 – 6.99 (m, 2H), 5.82 (t,  $J$  = 5.3 Hz, 1H), 3.28 – 3.16 (m, 2H).  $^{13}\text{C}$  NMR (101 MHz, Chloroform-*d*)  $\delta$  168.17 , 146.73 , 144.81 , 134.70 , 134.17 (t,  $J$  = 32.6 Hz) , 133.71 , 129.98 , 129.27 , 128.87 , 128.55 , 128.37 , 127.90 , 125.81 (q,  $J$  = 3.6 Hz) , 125.37 , 123.40 (q,  $J$  = 271.3 Hz) , 122.26 , 86.78 , 31.34 .  $^{19}\text{F}$  NMR (376 MHz, Chloroform-*d*)  $\delta$  -62.88 . HRMS (TOF)  $m/z$   $[\text{M} + \text{H}]^+$  Calcd for  $\text{C}_{22}\text{H}_{17}\text{F}_3\text{NO}_3\text{Sse}$  512.0041 found 512.0046.

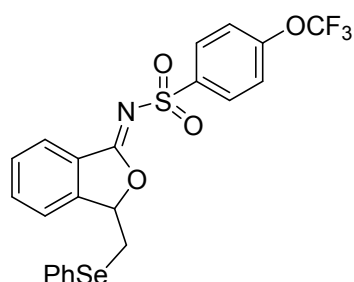

(Z)-N-(3-((phenylselanyl)methyl)isobenzofuran-1(3H)-ylidene)-4-(trifluoromethoxy)benzenesulfonamide (**3m**). White solid (72%, 0.114g).  $^1\text{H}$  NMR (400 MHz, Chloroform-*d*)  $\delta$  8.07 (d,  $J$  = 8.8 Hz, 2H), 7.79 (d,  $J$  = 6.4 Hz, 1H), 7.44 – 7.35 (m, 2H), 7.32 – 7.28 (m, 1H), 7.24 (d,  $J$  = 7.9 Hz, 4H), 7.16 – 7.11 (m, 1H), 7.11 – 7.05 (m, 2H), 5.82 (t,  $J$  = 5.4 Hz, 1H), 3.28 (dd,  $J$  = 13.4, 4.8 Hz, 1H), 3.19 (dd,  $J$  = 13.4, 6.2 Hz, 1H).  $^{13}\text{C}$  NMR (101 MHz, Chloroform-*d*)  $\delta$  166.71 , 151.12 , 145.63 , 138.70 , 133.53 , 132.77 , 128.98 , 128.92 , 128.27 , 128.01 , 127.48 , 126.93 , 124.42 , 121.20 , 119.53 , 119.24 (q,  $J$  = 258 Hz) , 85.55 , 30.27 .  $^{19}\text{F}$  NMR (376 MHz, Chloroform-*d*)  $\delta$  -57.59 . HRMS (TOF)  $m/z$   $[\text{M} + \text{H}]^+$  Calcd for  $\text{C}_{22}\text{H}_{17}\text{F}_3\text{NO}_4\text{Sse}$  527.9990 found 527.9993.

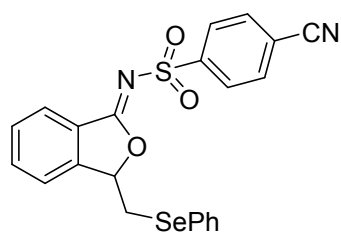

(Z)-4-cyano-N-(3-((phenylselanyl)methyl)isobenzofuran-1(3H)-ylidene)benzenesulfonamide (**3n**). White solid (70%, 0.098g).  $^1\text{H}$  NMR (400 MHz, Chloroform-*d*)  $\delta$  8.16 – 8.09 (m, 2H), 7.80 (d,  $J$  = 6.6 Hz, 1H), 7.72 (d,  $J$  = 8.5 Hz, 2H), 7.49 – 7.40 (m, 2H), 7.35 – 7.30 (m, 1H), 7.27 – 7.22 (m, 2H), 7.19



– 7.08 (m, 3H), 5.86 (t,  $J = 5.3$  Hz, 1H), 3.31 (dd,  $J = 13.4, 4.7$  Hz, 1H), 3.22 (dd,  $J = 13.5, 6.1$  Hz, 1H).  $^{13}\text{C}$  NMR (101 MHz, Chloroform- $d$ )  $\delta$  167.26, 145.71, 144.33, 133.76, 132.73, 131.49, 129.03, 128.32, 127.79, 127.38, 127.01, 124.49, 121.21, 116.56, 115.18, 85.77, 30.24. HRMS (TOF)  $m/z$   $[\text{M} + \text{H}]^+$  Calcd for  $\text{C}_{22}\text{H}_{17}\text{N}_2\text{O}_3\text{SSe}$  469.0120 found 469.0135.

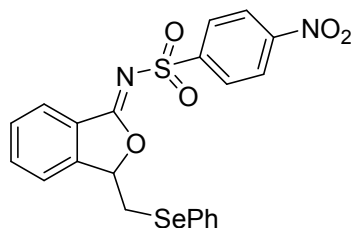

(*Z*)-4-nitro-*N*-(3-((phenylselanyl)methyl)isobenzofuran-1(3H)-ylidene)benzenesulfonamide (**3o**). White solid (61%, 0.089g).  $^1\text{H}$  NMR (400 MHz, DMSO- $d_6$ )  $\delta$  8.48 – 8.42 (m, 2H), 8.33 – 8.27 (m, 2H), 7.94 (d,  $J = 7.4$  Hz, 1H), 7.71 – 7.56 (m, 3H), 7.29 – 7.17 (m, 5H), 6.39 (t,  $J = 4.4$  Hz, 1H), 3.70 (dd,  $J = 13.6, 4.4$  Hz, 1H), 3.63 (dd,  $J = 13.6, 4.7$  Hz, 1H).  $^{13}\text{C}$  NMR (101 MHz, DMSO- $d_6$ )  $\delta$  169.09, 150.28, 147.83, 146.70, 135.48, 132.44, 130.47, 129.53, 129.50, 129.47, 128.53, 127.52, 125.11, 124.82, 123.20, 88.04, 30.86. HRMS (TOF)  $m/z$   $[\text{M} + \text{H}]^+$  Calcd for  $\text{C}_{21}\text{H}_{17}\text{N}_2\text{O}_5\text{SSe}$  489.0018 found 489.0027.

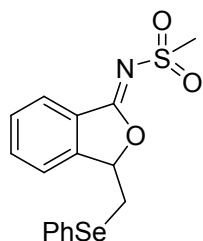

(*Z*)-*N*-(3-((phenylselanyl)methyl)isobenzofuran-1(3H)-ylidene)methanesulfonamide (**3p**). White solid (77%, 0.088g).  $^1\text{H}$  NMR (400 MHz, Chloroform- $d$ )  $\delta$  7.73 (d,  $J = 6.1$  Hz, 1H), 7.44 – 7.32 (m, 3H), 7.27 – 7.21 (m, 2H), 7.12 – 7.01 (m, 3H), 5.88 (dd,  $J = 6.2, 4.3$  Hz, 1H), 3.43 (dd,  $J = 13.5, 4.3$  Hz, 1H), 3.30 (dd,  $J = 13.5, 6.2$  Hz, 1H), 3.04 (s, 3H).  $^{13}\text{C}$  NMR (101 MHz, Chloroform- $d$ )  $\delta$  167.28, 146.72, 134.49, 133.59, 129.92, 129.29, 128.88, 128.64, 127.81, 125.07, 122.34, 86.38, 42.20, 31.36. HRMS (TOF)  $m/z$   $[\text{M} + \text{H}]^+$  Calcd for  $\text{C}_{16}\text{H}_{16}\text{NO}_3\text{SSe}$  382.0011 found 382.0019.

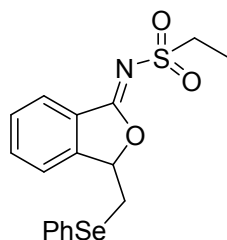

(*Z*)-*N*-(3-((phenylselanyl)methyl)isobenzofuran-1(3H)-ylidene)ethanesulfonamide (**3q**). White solid (74%, 0.087g).  $^1\text{H}$  NMR (400 MHz, Chloroform- $d$ )  $\delta$  7.76 (d,  $J = 7.1$  Hz, 1H), 7.41 (ddt,  $J = 10.9, 7.1, 3.6$  Hz, 3H), 7.29 (dd,  $J = 7.9, 1.4$  Hz, 2H), 7.15 – 7.03 (m, 3H), 5.85 (dd,  $J = 6.5, 4.2$  Hz, 1H), 3.47 (dd,  $J = 13.4, 4.1$  Hz, 1H), 3.25 (dd,  $J = 13.4, 6.7$  Hz, 1H), 3.14 (qd,  $J = 7.3, 2.0$  Hz, 2H), 1.36 (t,  $J = 7.4$  Hz, 3H).  $^{13}\text{C}$  NMR (101 MHz, Chloroform- $d$ )  $\delta$  167.42, 146.74, 134.35, 133.67, 129.87, 129.29, 129.05, 128.60, 127.84, 125.09, 122.39, 86.10, 48.82, 31.31, 8.30. HRMS (TOF)  $m/z$   $[\text{M} + \text{H}]^+$  Calcd for  $\text{C}_{17}\text{H}_{18}\text{NO}_3\text{SSe}$  396.0167 found 396.0159.

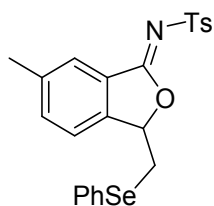

(Z)-4-methyl-N-(6-methyl-3-((phenylselanyl)methyl)isobenzofuran-1(3H)-ylidene)benzenesulfonamide (**3r**). White solid (80%, 0.113g).  $^1\text{H}$  NMR (400 MHz, Chloroform-*d*)  $\delta$  7.87 (d,  $J = 8.3$  Hz, 2H), 7.52 (s, 1H), 7.21 – 7.14 (m, 4H), 7.13 – 7.07 (m, 3H), 7.06 – 7.00 (m, 2H), 5.73 (t,  $J = 5.3$  Hz, 1H), 3.23 (dd,  $J = 13.4, 4.7$  Hz, 1H), 3.11 (dd,  $J = 13.4, 6.0$  Hz, 1H), 2.27 (s, 3H), 2.24 (s, 3H).  $^{13}\text{C}$  NMR (101 MHz, Chloroform-*d*)  $\delta$  167.41 , 143.99 , 143.48 , 140.17 , 138.34 , 135.48 , 133.60 , 129.34 , 129.21 , 129.15 , 128.79 , 127.84 , 127.73 , 125.11 , 121.94 , 86.21 , 31.66 , 21.61 , 21.21 . HRMS (TOF)  $m/z$   $[\text{M} + \text{H}]^+$  Calcd for  $\text{C}_{23}\text{H}_{22}\text{NO}_3\text{SSe}$  472.0480 found 472.0471.

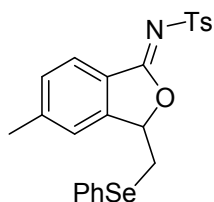

(Z)-4-methyl-N-(5-methyl-3-((phenylselanyl)methyl)isobenzofuran-1(3H)-ylidene)benzenesulfonamide (**3s**). White solid (78%, 0.111g).  $^1\text{H}$  NMR (400 MHz, Chloroform-*d*)  $\delta$  7.91 (d,  $J = 8.3$  Hz, 2H), 7.70 (d,  $J = 7.8$  Hz, 1H), 7.28 – 7.21 (m, 3H), 7.21 – 7.17 (m, 2H), 7.17 – 7.08 (m, 3H), 7.04 (s, 1H), 5.75 (dd,  $J = 6, 4.8$  Hz, 1H), 3.28 (dd,  $J = 13.4, 4.5$  Hz, 1H), 3.14 (dd,  $J = 13.4, 6.4$  Hz, 1H), 2.33 (s, 3H), 2.24 (s, 3H).  $^{13}\text{C}$  NMR (101 MHz, Chloroform-*d*)  $\delta$  166.20 , 145.90 , 144.78 , 142.32 , 137.45 , 132.82 , 129.97 , 128.15 , 128.11 , 127.66 , 126.86 , 126.83 , 125.78 , 124.17 , 121.51 , 84.76 , 30.41 , 21.02 , 20.57 . HRMS (TOF)  $m/z$   $[\text{M} + \text{H}]^+$  Calcd for  $\text{C}_{23}\text{H}_{22}\text{NO}_3\text{SSe}$  472.0480 found 472.0489.

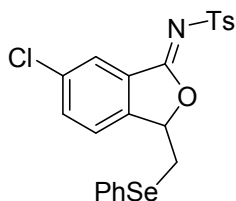

(Z)-N-(6-chloro-3-((phenylselanyl)methyl)isobenzofuran-1(3H)-ylidene)-4-methylbenzenesulfonamide (**3t**). White solid (82%, 0.120g).  $^1\text{H}$  NMR (400 MHz, Chloroform-*d*)  $\delta$  7.85 (d,  $J = 8.3$  Hz, 2H), 7.67 (s, 1H), 7.19 (d,  $J = 8.1$  Hz, 3H), 7.16 – 7.08 (m, 4H), 7.03 (t,  $J = 7.3$  Hz, 2H), 5.82 (dd,  $J = 5.6, 4.4$  Hz, 1H), 3.30 (dd,  $J = 13.6, 4.1$  Hz, 1H), 3.16 (dd,  $J = 13.6, 6.0$  Hz, 1H), 2.30 (s, 3H).  $^{13}\text{C}$  NMR (101 MHz, Chloroform-*d*)  $\delta$  165.77 , 144.63 , 143.81 , 137.95 , 135.97 , 134.18 , 133.63 , 131.10 , 129.30 , 129.20 , 128.65 , 127.88 , 127.85 , 124.78 , 123.58 , 86.06 , 31.69 , 21.65 . HRMS (TOF)  $m/z$   $[\text{M} + \text{H}]^+$  Calcd for  $\text{C}_{22}\text{H}_{19}\text{ClNO}_3\text{SSe}$  491.9934 found 491.9942.

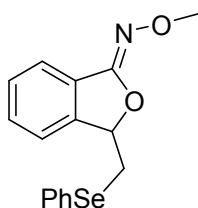

(Z)-3-((phenylselanyl)methyl)isobenzofuran-1(3H)-one O-methyl oxime (**3u**). White solid (81%, 0.080g).  $^1\text{H}$  NMR (400 MHz, Chloroform-*d*)  $\delta$  7.55 (dd,  $J = 6.5, 1.5$  Hz, 1H), 7.38 – 7.34 (m, 2H),

7.34 – 7.31 (m, 1H), 7.24 (pd,  $J = 7.3, 1.2$  Hz, 2H), 7.13 – 7.06 (m, 3H), 5.60 (dd,  $J = 7.0, 4.4$  Hz, 1H), 3.82 (s, 3H), 3.36 (dd,  $J = 13.1, 4.4$  Hz, 1H), 3.13 (dd,  $J = 13.1, 7.1$  Hz, 1H).  $^{13}\text{C}$  NMR (101 MHz, Chloroform-*d*)  $\delta$  155.66 , 143.28 , 133.47 , 130.65 , 129.20 , 129.15 , 129.12 , 128.86 , 127.56 , 122.19 , 121.59 , 83.91 , 62.70 , 32.19 . HRMS (TOF)  $m/z$   $[\text{M} + \text{H}]^+$  Calcd for  $\text{C}_{16}\text{H}_{16}\text{NO}_2\text{Se}$  334.0341 found 334.0331.

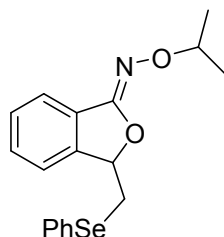

(*Z*)-3-((phenylselanyl)methyl)isobenzofuran-1(3H)-one O-isopropyl oxime (**3v**). White solid (77%, 0.083g).  $^1\text{H}$  NMR (400 MHz, Chloroform-*d*)  $\delta$  7.57 (dd,  $J = 6.2, 1.8$  Hz, 1H), 7.45 – 7.39 (m, 2H), 7.37 (dd,  $J = 6.0, 2.1$  Hz, 1H), 7.30 – 7.21 (m, 2H), 7.11 (qd,  $J = 4.9, 1.7$  Hz, 3H), 5.63 (dd,  $J = 7.4, 4.0$  Hz, 1H), 4.24 (p,  $J = 6.2$  Hz, 1H), 3.41 (dd,  $J = 13.1, 4.0$  Hz, 1H), 3.12 (dd,  $J = 13.1, 7.5$  Hz, 1H), 1.23 (d,  $J = 6.3$  Hz, 6H).  $^{13}\text{C}$  NMR (101 MHz, Chloroform-*d*)  $\delta$  142.12 , 132.57 , 129.29 , 128.35 , 128.12 , 128.09 , 127.96 , 126.49 , 121.09 , 120.47 , 82.59 , 75.03 , 31.36 , 20.55 . HRMS (TOF)  $m/z$   $[\text{M} + \text{H}]^+$  Calcd for  $\text{C}_{18}\text{H}_{20}\text{NO}_2\text{Se}$  362.0654 found 362.0647.

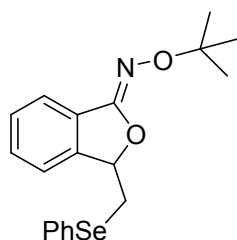

(*Z*)-3-((phenylselanyl)methyl)isobenzofuran-1(3H)-one O-(tert-butyl) oxime (**3w**). White solid (82%, 0.093g).  $^1\text{H}$  NMR (400 MHz, Chloroform-*d*)  $\delta$  7.68 (dd,  $J = 6.0, 2.4$  Hz, 1H), 7.58 – 7.53 (m, 2H), 7.51 (dd,  $J = 5.5, 2.6$  Hz, 1H), 7.41 – 7.34 (m, 2H), 7.24 (dd,  $J = 5.2, 1.9$  Hz, 3H), 5.74 (dd,  $J = 7.5, 4.0$  Hz, 1H), 3.54 (dd,  $J = 13.0, 4.1$  Hz, 1H), 3.23 (dd,  $J = 13.0, 7.6$  Hz, 1H), 1.37 (s, 9H).  $^{13}\text{C}$  NMR (101 MHz, Chloroform-*d*)  $\delta$  154.20 , 143.13 , 133.67 , 130.15 , 129.91 , 129.29 , 129.17 , 128.95 , 127.56 , 122.14 , 121.58 , 83.54 , 78.86 , 32.51 , 27.45 . HRMS (TOF)  $m/z$   $[\text{M} + \text{H}]^+$  Calcd for  $\text{C}_{19}\text{H}_{22}\text{NO}_2\text{Se}$  376.0810 found 376.0801.

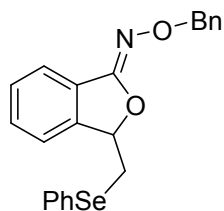

(*Z*)-3-((phenylselanyl)methyl)isobenzofuran-1(3H)-one O-benzyl oxime (**3x**). White solid (84%, 0.103g).  $^1\text{H}$  NMR (400 MHz, Chloroform-*d*)  $\delta$  7.52 (dd,  $J = 5.6, 2.8$  Hz, 1H), 7.40 – 7.28 (m, 5H), 7.26 – 7.13 (m, 5H), 7.07 (q,  $J = 6.2$  Hz, 3H), 5.59 (dd,  $J = 7.0, 4.1$  Hz, 1H), 5.03 (s, 2H), 3.36 (dd,  $J = 13.1, 4.2$  Hz, 1H), 3.10 (dd,  $J = 13.1, 7.2$  Hz, 1H).  $^{13}\text{C}$  NMR (101 MHz, Chloroform-*d*)  $\delta$  155.99 , 143.37 , 137.99 , 133.59 , 130.68 , 129.26 , 129.14 , 128.49 , 128.38 , 127.86 , 127.62 , 122.19 , 121.81 , 83.97 , 76.83 , 32.38 . HRMS (TOF)  $m/z$   $[\text{M} + \text{H}]^+$  Calcd for  $\text{C}_{22}\text{H}_{20}\text{NO}_2\text{Se}$  410.0654 found 410.0659.

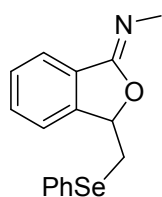

(Z)-N-methyl-3-((phenylselanyl)methyl)isobenzofuran-1(3H)-imine (**3y**). Yellow oil (31%, 0.030g).  $^1\text{H}$  NMR (400 MHz, Chloroform-*d*)  $\delta$  7.66 (dt,  $J = 7.0, 3.7$  Hz, 1H), 7.42 – 7.36 (m, 2H), 7.32 – 7.24 (m, 3H), 7.12 (dd,  $J = 4.9, 1.9$  Hz, 3H), 5.54 (t,  $J = 5.5$  Hz, 1H), 3.22 (d,  $J = 5.6$  Hz, 2H), 2.99 (s, 3H).  $^{13}\text{C}$  NMR (101 MHz, Chloroform-*d*)  $\delta$  159.63, 145.17, 133.31, 131.10, 129.67, 129.13, 129.05, 127.39, 123.00, 121.74, 81.68, 34.33, 32.77. HRMS (TOF)  $m/z$   $[\text{M} + \text{H}]^+$  Calcd for  $\text{C}_{16}\text{H}_{16}\text{NOSe}$  318.0392 found 318.0399.

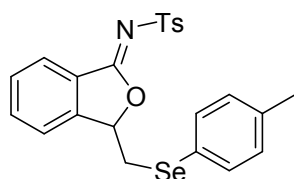

(Z)-4-methyl-N-(3-((p-tolylselanyl)methyl)isobenzofuran-1(3H)-ylidene)benzenesulfonamide (**3aa**). White solid (78%, 0.110g).  $^1\text{H}$  NMR (400 MHz, Chloroform-*d*)  $\delta$  7.91 (d,  $J = 8.3$  Hz, 2H), 7.83 (d,  $J = 7.3$  Hz, 1H), 7.47 – 7.38 (m, 3H), 7.23 (d,  $J = 8.0$  Hz, 4H), 6.96 (d,  $J = 7.9$  Hz, 2H), 5.76 (dd,  $J = 6.8, 4.9$  Hz, 1H), 3.27 (dd,  $J = 13.2, 4.8$  Hz, 1H), 3.06 (dd,  $J = 13.2, 6.9$  Hz, 1H), 2.34 (s, 3H), 2.24 (s, 3H).  $^{13}\text{C}$  NMR (101 MHz, Chloroform-*d*)  $\delta$  166.00, 145.68, 142.39, 137.40, 137.21, 133.23, 133.16, 129.13, 128.78, 128.17, 126.82, 125.45, 124.50, 123.67, 121.20, 85.18, 30.33, 20.57, 20.10. HRMS (TOF)  $m/z$   $[\text{M} + \text{H}]^+$  Calcd for  $\text{C}_{23}\text{H}_{22}\text{NO}_3\text{SSe}$  472.0480 found 472.0469.

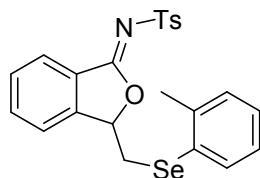

(Z)-4-methyl-N-(3-((o-tolylselanyl)methyl)isobenzofuran-1(3H)-ylidene)benzenesulfonamide (**3ab**). White solid (70%, 0.099g).  $^1\text{H}$  NMR (400 MHz, Chloroform-*d*)  $\delta$  7.90 (d,  $J = 8.3$  Hz, 2H), 7.79 (d,  $J = 7.2$  Hz, 1H), 7.43 – 7.31 (m, 3H), 7.25 (d,  $J = 7.6$  Hz, 1H), 7.19 (d,  $J = 8.1$  Hz, 2H), 7.08 – 7.00 (m, 2H), 6.95 (td,  $J = 7.4, 2.0$  Hz, 1H), 5.78 (dd,  $J = 6, 4.8$  Hz, 1H), 3.25 (dd,  $J = 13.3, 4.7$  Hz, 1H), 3.10 (dd,  $J = 13.3, 6.5$  Hz, 1H), 2.31 (s, 3H), 2.19 (s, 3H).  $^{13}\text{C}$  NMR (101 MHz, Chloroform-*d*)  $\delta$  166.04, 145.55, 142.45, 139.23, 137.32, 133.25, 132.45, 129.16, 128.79, 128.58, 128.16, 126.95, 126.81, 125.74, 125.37, 124.37, 121.07, 85.23, 29.19, 21.52, 20.56. HRMS (TOF)  $m/z$   $[\text{M} + \text{H}]^+$  Calcd for  $\text{C}_{23}\text{H}_{22}\text{NO}_3\text{SSe}$  472.0480 found 472.0472.

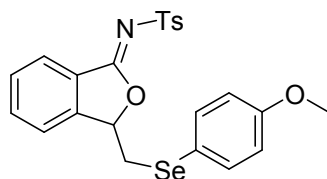

(Z)-N-(3-(((4-methoxyphenyl)selanyl)methyl)isobenzofuran-1(3H)-ylidene)-4-methylbenzenesulfonamide (**3ac**). White solid (76%, 0.111g).  $^1\text{H}$  NMR (400 MHz, Chloroform-*d*)  $\delta$  7.91 (d,  $J = 8.3$  Hz, 2H), 7.82 (d,  $J = 7.2$  Hz, 1H), 7.48 – 7.32 (m, 3H), 7.22 (dd,  $J = 8.7, 2.6$  Hz, 4H),

6.69 – 6.63 (m, 2H), 5.75 (dd,  $J = 6.4, 5.2$  Hz, 1H), 3.70 (s, 3H), 3.19 (dd,  $J = 13.3, 4.8$  Hz, 1H), 3.06 (dd,  $J = 13.3, 6.6$  Hz, 1H), 2.34 (s, 3H).  $^{13}\text{C}$  NMR (101 MHz, Chloroform- $d$ )  $\delta$  166.09, 158.88, 145.65, 142.42, 137.31, 135.44, 133.18, 128.77, 128.33, 128.16, 126.82, 124.44, 121.14, 117.43, 113.96, 85.18, 54.33, 30.95, 20.59. HRMS (TOF)  $m/z$   $[\text{M} + \text{H}]^+$  Calcd for  $\text{C}_{23}\text{H}_{22}\text{NO}_4\text{SSe}$  488.0429 found 488.0438.

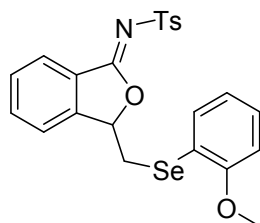

(Z)-N-(3-(((2-methoxyphenyl)selanyl)methyl)isobenzofuran-1(3H)-ylidene)-4-methylbenzenesulfonamide (**3ad**). White solid (69%, 0.101g).  $^1\text{H}$  NMR (400 MHz, Chloroform- $d$ )  $\delta$  7.89 (d,  $J = 8.3$  Hz, 2H), 7.77 (d,  $J = 7.4$  Hz, 1H), 7.47 – 7.33 (m, 3H), 7.22 – 7.12 (m, 4H), 6.77 – 6.66 (m, 2H), 5.77 (dd,  $J = 7.1, 4.8$  Hz, 1H), 3.77 (s, 3H), 3.37 (dd,  $J = 13.2, 4.7$  Hz, 1H), 2.94 (dd,  $J = 13.2, 7.2$  Hz, 1H), 2.30 (s, 3H).  $^{13}\text{C}$  NMR (101 MHz, Chloroform- $d$ )  $\delta$  166.18, 157.52, 145.83, 142.41, 137.28, 133.19, 132.99, 128.75, 128.46, 128.14, 128.03, 126.80, 124.28, 121.39, 120.38, 115.82, 109.78, 85.62, 54.85, 27.38, 20.57. HRMS (TOF)  $m/z$   $[\text{M} + \text{H}]^+$  Calcd for  $\text{C}_{23}\text{H}_{22}\text{NO}_4\text{SSe}$  488.0429 found 488.0427.

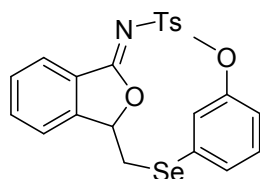

(Z)-N-(3-(((3-methoxyphenyl)selanyl)methyl)isobenzofuran-1(3H)-ylidene)-4-methylbenzenesulfonamide (**3ae**). White solid (74%, 0.108g).  $^1\text{H}$  NMR (400 MHz, Chloroform- $d$ )  $\delta$  7.94 – 7.89 (m, 2H), 7.81 (d,  $J = 6.6$  Hz, 1H), 7.45 – 7.38 (m, 2H), 7.35 – 7.30 (m, 1H), 7.22 (d,  $J = 8.1$  Hz, 2H), 7.05 (t,  $J = 7.9$  Hz, 1H), 6.88 (d,  $J = 7.6$  Hz, 1H), 6.80 – 6.76 (m, 1H), 6.73 – 6.68 (m, 1H), 5.80 (dd,  $J = 6.3, 4.8$  Hz, 1H), 3.68 (s, 3H), 3.32 (dd,  $J = 13.3, 4.7$  Hz, 1H), 3.14 (dd,  $J = 13.3, 6.6$  Hz, 1H), 2.33 (s, 3H).  $^{13}\text{C}$  NMR (101 MHz, Chloroform- $d$ )  $\delta$  166.02, 158.69, 145.47, 142.45, 137.27, 133.11, 129.06, 128.78, 128.45, 128.30, 128.16, 126.84, 124.76, 124.40, 121.17, 118.07, 112.69, 85.06, 54.31, 30.26, 20.57. HRMS (TOF)  $m/z$   $[\text{M} + \text{H}]^+$  Calcd for  $\text{C}_{23}\text{H}_{22}\text{NO}_4\text{SSe}$  488.0429 found 488.0432.

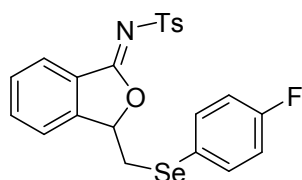

(Z)-N-(3-(((4-fluorophenyl)selanyl)methyl)isobenzofuran-1(3H)-ylidene)-4-methylbenzenesulfonamide (**3af**). White solid (83%, 0.119g).  $^1\text{H}$  NMR (400 MHz, Chloroform- $d$ )  $\delta$  7.92 (d,  $J = 7.7$  Hz, 2H), 7.84 (d,  $J = 5.2$  Hz, 1H), 7.42 (q,  $J = 7.9, 5.8$  Hz, 2H), 7.26 (dt,  $J = 12.6, 6.5$  Hz, 5H), 6.82 (t,  $J = 8.3$  Hz, 2H), 5.82 (t,  $J = 5.2$  Hz, 1H), 3.27 (dd,  $J = 13.4, 4.4$  Hz, 1H), 3.18 (dd,  $J = 13.4, 6.1$  Hz, 1H), 2.35 (s, 3H).  $^{13}\text{C}$  NMR (101 MHz, Chloroform- $d$ )  $\delta$  165.94, 161.75 (d,  $J = 247$  Hz), 145.31, 142.47, 137.25, 135.46 (d,  $J = 8$  Hz), 133.16, 128.84, 128.45, 128.17, 126.79, 124.48,

122.13 (d,  $J = 4$  Hz) , 120.92 , 115.43 (d,  $J = 21$  Hz) , 84.89 , 31.18 , 20.59 .  $^{19}\text{F}$  NMR (376 MHz, Chloroform- $d$ )  $\delta$  -112.95 . HRMS (TOF)  $m/z$   $[\text{M} + \text{H}]^+$  Calcd for  $\text{C}_{22}\text{H}_{19}\text{FNO}_3\text{SSe}$  476.0229 found 476.0235.

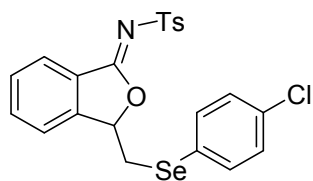

(*Z*)-*N*-(3-(((4-chlorophenyl)selanyl)methyl)isobenzofuran-1(3*H*)-ylidene)-4-methylbenzenesulfonamide (**3ag**). White solid (80%, 0.118g).  $^1\text{H}$  NMR (400 MHz, Chloroform- $d$ )  $\delta$  7.92 (d,  $J = 8.0$  Hz, 2H), 7.83 (s, 1H), 7.47 – 7.39 (m, 2H), 7.29 – 7.21 (m, 3H), 7.21 – 7.17 (m, 2H), 7.08 (d,  $J = 8.2$  Hz, 2H), 5.83 (t,  $J = 5.2$  Hz, 1H), 3.30 (dd,  $J = 13.5, 4.5$  Hz, 1H), 3.21 (dd,  $J = 13.5, 6.0$  Hz, 1H), 2.35 (s, 3H).  $^{13}\text{C}$  NMR (101 MHz, Chloroform- $d$ )  $\delta$  165.86 , 145.26 , 142.47 , 137.33 , 134.29 , 133.29 , 133.20 , 128.89 , 128.45 , 128.38 , 128.19 , 126.79 , 125.83 , 124.51 , 120.92 , 84.86 , 30.89 , 20.59 . HRMS (TOF)  $m/z$   $[\text{M} + \text{H}]^+$  Calcd for  $\text{C}_{22}\text{H}_{19}\text{ClNO}_3\text{SSe}$  491.9934 found 491.9941.

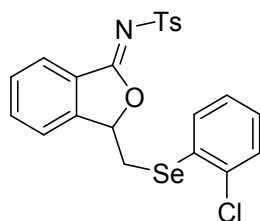

(*Z*)-*N*-(3-(((2-chlorophenyl)selanyl)methyl)isobenzofuran-1(3*H*)-ylidene)-4-methylbenzenesulfonamide (**3ah**). White solid (73%, 0.107g).  $^1\text{H}$  NMR (400 MHz, Chloroform- $d$ )  $\delta$  7.90 (d,  $J = 8.3$  Hz, 2H), 7.80 (d,  $J = 7.3$  Hz, 1H), 7.45 – 7.35 (m, 3H), 7.26 – 7.18 (m, 4H), 7.09 (td,  $J = 7.7, 1.6$  Hz, 1H), 7.01 (td,  $J = 7.6, 1.4$  Hz, 1H), 5.84 (dd,  $J = 6, 5.2$  Hz, 1H), 3.41 (dd,  $J = 13.4, 4.7$  Hz, 1H), 3.15 (dd,  $J = 13.4, 6.5$  Hz, 1H), 2.31 (s, 3H).  $^{13}\text{C}$  NMR (101 MHz, Chloroform- $d$ )  $\delta$  165.90 , 145.35 , 142.51 , 137.21 , 135.57 , 133.31 , 132.61 , 128.92 , 128.70 , 128.18 , 127.85 , 126.81 , 126.46 , 124.48 , 121.07 , 84.97 , 28.86 , 20.57 . HRMS (TOF)  $m/z$   $[\text{M} + \text{H}]^+$  Calcd for  $\text{C}_{22}\text{H}_{19}\text{ClNO}_3\text{SSe}$  491.9934 found 491.9932.

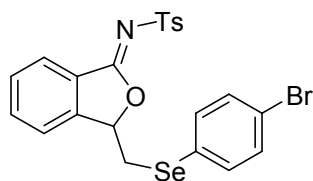

(*Z*)-*N*-(3-(((4-bromophenyl)selanyl)methyl)isobenzofuran-1(3*H*)-ylidene)-4-methylbenzenesulfonamide (**3ai**). White solid (81%, 0.130g).  $^1\text{H}$  NMR (400 MHz, Chloroform- $d$ )  $\delta$  7.88 (d,  $J = 8.3$  Hz, 2H), 7.80 – 7.73 (m, 1H), 7.37 (dt,  $J = 7.4, 3.5$  Hz, 2H), 7.25 – 7.12 (m, 5H), 7.09 – 7.04 (m, 2H), 5.84 (t,  $J = 5.0$  Hz, 1H), 3.30 – 3.20 (m, 2H), 2.30 (s, 3H).  $^{13}\text{C}$  NMR (101 MHz, Chloroform- $d$ )  $\delta$  167.09 , 146.28 , 143.57 , 138.28 , 135.38 , 134.33 , 132.22 , 129.90 , 129.32 , 129.25 , 127.82 , 127.78 , 125.31 , 122.16 , 122.09 , 86.08 , 31.96 , 21.64 . HRMS (TOF)  $m/z$   $[\text{M} + \text{H}]^+$  Calcd for  $\text{C}_{22}\text{H}_{19}\text{BrNO}_3\text{SSe}$  535.9429 found 535.9438.

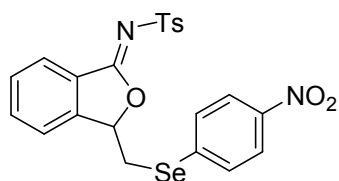

(Z)-4-methyl-N-(3-((4-nitrophenyl)selanyl)methyl)isobenzofuran-1(3H)-ylidene)benzenesulfonamide (**3aj**). White solid (51%, 0.077g).  $^1\text{H}$  NMR (400 MHz, Chloroform-*d*)  $\delta$  7.99 – 7.93 (m, 2H), 7.89 (d,  $J$  = 8.3 Hz, 2H), 7.83 (d,  $J$  = 5.5 Hz, 1H), 7.44 (ddt,  $J$  = 9.0, 7.4, 1.9 Hz, 4H), 7.29 (dd,  $J$  = 5.7, 2.4 Hz, 1H), 7.23 (d,  $J$  = 8.3 Hz, 2H), 5.96 (t,  $J$  = 5.0 Hz, 1H), 3.47 (dd,  $J$  = 5.0, 1.8 Hz, 2H), 2.34 (s, 3H).  $^{13}\text{C}$  NMR (101 MHz, Chloroform-*d*)  $\delta$  165.52 , 145.92 , 144.93 , 142.56 , 138.04 , 137.30 , 133.36 , 131.35 , 129.13 , 128.49 , 128.24 , 126.65 , 124.62 , 122.93 , 120.75 , 84.63 , 30.33 , 20.58 . HRMS (TOF)  $m/z$   $[\text{M} + \text{H}]^+$  Calcd for  $\text{C}_{22}\text{H}_{19}\text{N}_2\text{O}_5\text{SSe}$  503.0174 found 503.0178.

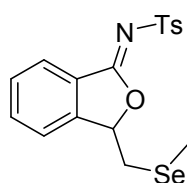

(Z)-4-methyl-N-(3-((methylselanyl)methyl)isobenzofuran-1(3H)-ylidene)benzenesulfonamide (**3ak**). White solid (78%, 0.092g).  $^1\text{H}$  NMR (400 MHz, Chloroform-*d*)  $\delta$  7.89 (d,  $J$  = 8.3 Hz, 2H), 7.81 (d,  $J$  = 7.7 Hz, 1H), 7.58 (td,  $J$  = 7.6, 1.0 Hz, 1H), 7.50 – 7.42 (m, 2H), 7.22 (d,  $J$  = 8.1 Hz, 2H), 5.89 (t,  $J$  = 5.3 Hz, 1H), 2.95 (d,  $J$  = 5.4 Hz, 2H), 2.33 (s, 3H), 1.91 (s, 3H).  $^{13}\text{C}$  NMR (101 MHz, Chloroform-*d*)  $\delta$  167.17 , 147.02 , 143.42 , 138.48 , 134.53 , 129.87 , 129.47 , 129.23 , 127.64 , 125.47 , 121.92 , 87.43 , 28.15 , 21.59 , 6.32 . HRMS (TOF)  $m/z$   $[\text{M} + \text{H}]^+$  Calcd for  $\text{C}_{17}\text{H}_{18}\text{NO}_3\text{SSe}$  396.0167 found 396.0172.

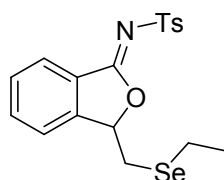

(Z)-N-(3-((ethylselanyl)methyl)isobenzofuran-1(3H)-ylidene)-4-methylbenzenesulfonamide (**3al**). White solid (75%, 0.092g).  $^1\text{H}$  NMR (400 MHz, Chloroform-*d*)  $\delta$  7.89 (d,  $J$  = 8.3 Hz, 2H), 7.82 (d,  $J$  = 7.7 Hz, 1H), 7.62 – 7.56 (m, 1H), 7.52 – 7.42 (m, 2H), 7.22 (d,  $J$  = 8.1 Hz, 2H), 5.88 (t,  $J$  = 5.5 Hz, 1H), 3.01 (dd,  $J$  = 13.6, 5.0 Hz, 1H), 2.92 (dd,  $J$  = 13.5, 6.2 Hz, 1H), 2.52 (qd,  $J$  = 7.5, 2.4 Hz, 2H), 2.34 (s, 3H), 1.26 (t,  $J$  = 7.5 Hz, 3H).  $^{13}\text{C}$  NMR (101 MHz, Chloroform-*d*)  $\delta$  166.11 , 146.12 , 142.35 , 137.50 , 133.45 , 128.83 , 128.43 , 128.20 , 126.61 , 124.50 , 120.89 , 86.47 , 24.93 , 20.56 , 18.27 , 14.64 . HRMS (TOF)  $m/z$   $[\text{M} + \text{H}]^+$  Calcd for  $\text{C}_{18}\text{H}_{20}\text{NO}_3\text{SSe}$  410.0324 found 410.0329.

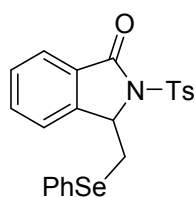

3-((phenylselanyl)methyl)-2-tosylisobenzofuran-1-one (**4a**). White solid (54%, 0.074g).  $^1\text{H}$  NMR (400 MHz, Chloroform-*d*)  $\delta$  7.93 (s, 2H), 7.71 (d,  $J$  = 7.2 Hz, 1H), 7.32 (ddd,  $J$  = 9.1, 5.3, 2.2 Hz, 1H), 7.29

– 7.26 (m, 2H), 7.23 (d,  $J = 8.1$  Hz, 2H), 7.16 – 7.08 (m, 3H), 7.07 – 7.01 (m, 2H), 5.44 (dd,  $J = 6.1$ , 2.5 Hz, 1H), 3.73 (dd,  $J = 13.2$ , 2.5 Hz, 1H), 3.63 (dd,  $J = 13.2$ , 6.2 Hz, 1H), 2.33 (s, 3H).  $^{13}\text{C}$  NMR (101 MHz, Chloroform-*d*)  $\delta$  165.43, 144.14, 143.16, 134.79, 132.49, 132.26, 128.89, 128.64, 128.27, 128.12, 127.92, 127.20, 126.29, 123.67, 122.22, 59.89, 31.84, 20.68. HRMS (TOF)  $m/z$   $[\text{M} + \text{H}]^+$  Calcd for  $\text{C}_{22}\text{H}_{20}\text{NO}_3\text{SSe}$  458.0324 found 458.0321.

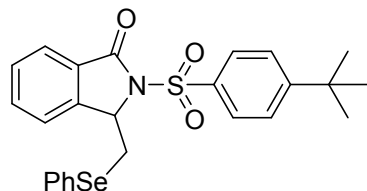

2-((4-(tert-butyl)phenyl)sulfonyl)-3-((phenylselanyl)methyl)isoindolin-1-one (**4b**). White solid (58%, 0.087g).  $^1\text{H}$  NMR (400 MHz, Chloroform-*d*)  $\delta$  7.97 – 7.93 (m, 2H), 7.70 (dd,  $J = 7.0$ , 1.3 Hz, 1H), 7.45 – 7.41 (m, 2H), 7.33 – 7.26 (m, 3H), 7.15 (dd,  $J = 8.2$ , 1.3 Hz, 2H), 7.12 – 7.07 (m, 1H), 7.06 – 7.01 (m, 2H), 5.44 (dd,  $J = 6.2$ , 2.4 Hz, 1H), 3.74 (dd,  $J = 13.1$ , 2.5 Hz, 1H), 3.63 (dd,  $J = 13.1$ , 6.2 Hz, 1H), 1.22 (s, 9H).  $^{13}\text{C}$  NMR (101 MHz, Chloroform-*d*)  $\delta$  165.44, 156.93, 143.22, 134.73, 132.51, 132.23, 128.90, 128.30, 128.12, 127.93, 127.02, 126.28, 125.05, 123.63, 122.27, 59.94, 34.24, 31.85, 29.96. HRMS (TOF)  $m/z$   $[\text{M} + \text{H}]^+$  Calcd for  $\text{C}_{25}\text{H}_{26}\text{NO}_3\text{SSe}$  500.0793 found 500.0798.

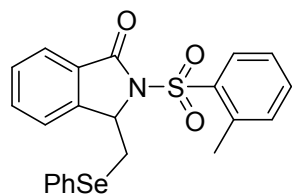

3-((phenylselanyl)methyl)-2-(o-tolylsulfonyl)isoindolin-1-one (**4c**). White solid (51%, 0.070g).  $^1\text{H}$  NMR (400 MHz, Chloroform-*d*)  $\delta$  8.12 (dd,  $J = 8.0$ , 1.2 Hz, 1H), 7.71 – 7.66 (m, 1H), 7.44 – 7.39 (m, 2H), 7.38 – 7.32 (m, 2H), 7.31 (d,  $J = 7.6$  Hz, 1H), 7.29 – 7.25 (m, 2H), 7.17 (s, 1H), 7.15 – 7.06 (m, 3H), 5.49 (dd,  $J = 6.9$ , 2.5 Hz, 1H), 3.88 (dd,  $J = 13.1$ , 2.5 Hz, 1H), 3.57 (dd,  $J = 13.1$ , 6.9 Hz, 1H), 2.48 (s, 3H).  $^{13}\text{C}$  NMR (101 MHz, Chloroform-*d*)  $\delta$  165.07, 143.23, 136.97, 135.96, 132.99, 132.57, 132.28, 131.50, 130.33, 128.58, 128.25, 128.14, 128.00, 126.35, 125.36, 123.81, 122.50, 60.30, 32.06, 19.44. HRMS (TOF)  $m/z$   $[\text{M} + \text{H}]^+$  Calcd for  $\text{C}_{22}\text{H}_{20}\text{NO}_3\text{SSe}$  458.0324 found 458.0327.

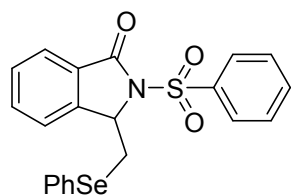

3-((phenylselanyl)methyl)-2-(phenylsulfonyl)isoindolin-1-one (**4d**). White solid (51%, 0.068g).  $^1\text{H}$  NMR (400 MHz, Chloroform-*d*)  $\delta$  8.08 – 8.02 (m, 2H), 7.72 (d,  $J = 7.3$  Hz, 1H), 7.55 (t,  $J = 7.4$  Hz, 1H), 7.45 (t,  $J = 7.7$  Hz, 2H), 7.36 – 7.26 (m, 3H), 7.17 – 7.09 (m, 3H), 7.04 (t,  $J = 7.3$  Hz, 2H), 5.46 (dd,  $J = 6.0$ , 2.5 Hz, 1H), 3.73 (dd,  $J = 13.2$ , 2.5 Hz, 1H), 3.64 (dd,  $J = 13.2$ , 6.1 Hz, 1H).  $^{13}\text{C}$  NMR (101 MHz, Chloroform-*d*)  $\delta$  165.41, 143.14, 137.74, 133.03, 132.57, 132.30, 128.80, 128.20, 128.17, 128.04, 127.94, 127.14, 126.34, 123.73, 122.22, 59.95, 31.84. HRMS (TOF)  $m/z$   $[\text{M} + \text{H}]^+$  Calcd for  $\text{C}_{21}\text{H}_{18}\text{NO}_3\text{SSe}$  444.0167 found 444.0169.



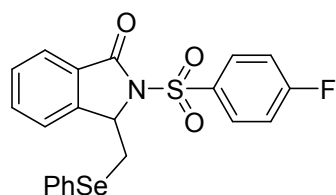

2-((4-fluorophenyl)sulfonyl)-3-((phenylselanyl)methyl)isoindolin-1-one (**4e**). White solid (47%, 0.065g).  $^1\text{H}$  NMR (400 MHz, Chloroform-*d*)  $\delta$  8.07 (ddd,  $J = 9.0, 5.0, 2.5$  Hz, 2H), 7.71 (d,  $J = 7.0$  Hz, 1H), 7.36 – 7.23 (m, 3H), 7.10 (dtd,  $J = 8.2, 5.8, 5.0, 2.2$  Hz, 5H), 7.06 – 7.00 (m, 2H), 5.46 (dd,  $J = 5.6, 2.7$  Hz, 1H), 3.70 (dd,  $J = 13.2, 2.7$  Hz, 1H), 3.65 (dd,  $J = 13.2, 5.6$  Hz, 1H).  $^{13}\text{C}$  NMR (101 MHz, Chloroform-*d*)  $\delta$  165.44, 164.87 (d,  $J = 255$  Hz), 143.06, 133.69 (d,  $J = 3$  Hz), 132.71, 132.22, 130.16 (d,  $J = 10$  Hz), 128.66, 128.25, 128.16, 127.96, 126.36, 123.69, 122.19, 115.31 (d,  $J = 23$  Hz), 59.96, 31.77.  $^{19}\text{F}$  NMR (376 MHz, Chloroform-*d*)  $\delta$  -102.52. HRMS (TOF)  $m/z$  [M + H] $^+$  Calcd for  $\text{C}_{21}\text{H}_{17}\text{FNO}_3\text{SSe}$  462.0073 found 462.0077.

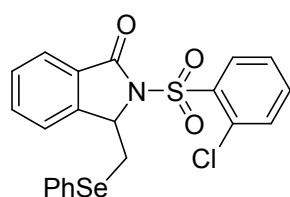

2-((2-chlorophenyl)sulfonyl)-3-((phenylselanyl)methyl)isoindolin-1-one (**4f**). White solid (50%, 0.071g).  $^1\text{H}$  NMR (400 MHz, Chloroform-*d*)  $\delta$  8.34 (dd,  $J = 7.5, 2.1$  Hz, 1H), 7.66 (dd,  $J = 6.3, 2.2$  Hz, 1H), 7.50 – 7.42 (m, 3H), 7.41 – 7.37 (m, 1H), 7.37 – 7.30 (m, 4H), 7.17 – 7.07 (m, 3H), 5.70 (dd,  $J = 7.0, 2.4$  Hz, 1H), 3.92 (dd,  $J = 13.1, 2.5$  Hz, 1H), 3.61 (dd,  $J = 13.1, 7.1$  Hz, 1H).  $^{13}\text{C}$  NMR (101 MHz, Chloroform-*d*)  $\delta$  164.92, 143.62, 134.95, 133.95, 132.97, 132.76, 132.31, 130.84, 130.56, 128.19, 128.15, 128.01, 126.35, 126.16, 123.80, 122.56, 61.05, 32.12. HRMS (TOF)  $m/z$  [M + H] $^+$  Calcd for  $\text{C}_{21}\text{H}_{17}\text{ClNO}_3\text{SSe}$  477.9777 found 477.9772.

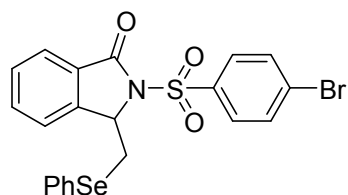

2-((4-bromophenyl)sulfonyl)-3-((phenylselanyl)methyl)isoindolin-1-one (**4g**). White solid (52%, 0.081g).  $^1\text{H}$  NMR (400 MHz, Chloroform-*d*)  $\delta$  7.93 – 7.87 (m, 2H), 7.73 (d,  $J = 6.8$  Hz, 1H), 7.60 – 7.54 (m, 2H), 7.38 – 7.25 (m, 3H), 7.12 (dt,  $J = 7.2, 2.5$  Hz, 3H), 7.08 – 7.01 (m, 2H), 5.46 (dd,  $J = 5.8, 2.4$  Hz, 1H), 3.72 (dd,  $J = 13.2, 2.5$  Hz, 1H), 3.64 (dd,  $J = 13.2, 5.9$  Hz, 1H).  $^{13}\text{C}$  NMR (101 MHz, Chloroform-*d*)  $\delta$  165.42, 143.09, 136.62, 132.77, 132.24, 131.32, 128.68, 128.60, 128.39, 128.30, 128.13, 127.99, 126.39, 123.78, 122.19, 59.96, 31.72. HRMS (TOF)  $m/z$  [M + H] $^+$  Calcd for  $\text{C}_{21}\text{H}_{17}\text{BrNO}_3\text{SSe}$  521.9272 found 521.9278.

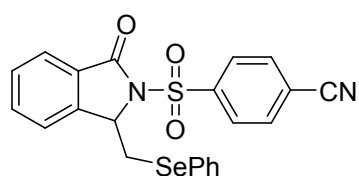

4-((1-oxo-3-((phenylselanyl)methyl)isoindolin-2-yl)sulfonyl)benzotrile (**4h**). White solid (45%, 0.063g).  $^1\text{H}$  NMR (400 MHz, Chloroform-*d*)  $\delta$  8.16 (d,  $J = 8.4$  Hz, 2H), 7.72 (t,  $J = 8.4$  Hz, 3H), 7.35

(dt,  $J = 14.9, 7.2$  Hz, 2H), 7.26 (d,  $J = 7.3$  Hz, 1H), 7.17 – 7.01 (m, 5H), 5.51 (dd,  $J = 4.5, 2.6$  Hz, 1H), 3.73 – 3.62 (m, 2H).  $^{13}\text{C}$  NMR (101 MHz, Chloroform-*d*)  $\delta$  165.39, 143.01, 141.52, 133.04, 132.11, 131.75, 128.46, 128.30, 128.04, 127.83, 126.48, 123.88, 122.17, 116.59, 116.11, 60.06, 31.61. HRMS (TOF)  $m/z$   $[\text{M} + \text{H}]^+$  Calcd for  $\text{C}_{22}\text{H}_{17}\text{N}_2\text{O}_3\text{SSe}$  469.0120 found 469.0111.

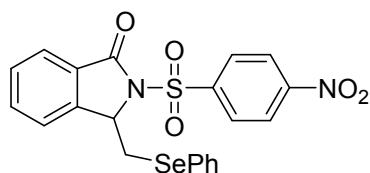

2-((4-nitrophenyl)sulfonyl)-3-((phenylselanyl)methyl)isoindolin-1-one (**4i**). White solid (34%, 0.050g).  $^1\text{H}$  NMR (400 MHz, Chloroform-*d*)  $\delta$  8.24 (s, 4H), 7.74 (dd,  $J = 6.5, 1.6$  Hz, 1H), 7.36 (pd,  $J = 7.3, 1.2$  Hz, 2H), 7.29 – 7.25 (m, 1H), 7.12 (ddt,  $J = 7.4, 6.2, 1.7$  Hz, 1H), 7.10 – 7.01 (m, 4H), 5.53 (dd,  $J = 5.1, 2.8$  Hz, 1H), 3.74 – 3.64 (m, 2H).  $^{13}\text{C}$  NMR (101 MHz, Chloroform-*d*)  $\delta$  165.39, 149.69, 143.01, 142.96, 133.11, 132.08, 128.60, 128.49, 128.26, 128.04, 127.99, 126.50, 123.91, 123.17, 122.16, 60.08, 31.61. HRMS (TOF)  $m/z$   $[\text{M} + \text{H}]^+$  Calcd for  $\text{C}_{21}\text{H}_{18}\text{N}_2\text{O}_5\text{SSe}$  489.0018 found 489.0010.

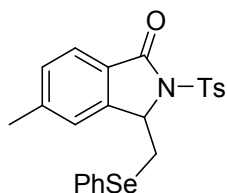

5-methyl-3-((phenylselanyl)methyl)-2-tosylisoindolin-1-one (**4j**). White solid (55%, 0.078g).  $^1\text{H}$  NMR (400 MHz, Chloroform-*d*)  $\delta$  7.91 (d,  $J = 8.4$  Hz, 2H), 7.56 (d,  $J = 7.9$  Hz, 1H), 7.21 (d,  $J = 8.2$  Hz, 2H), 7.10 – 7.05 (m, 4H), 7.03 – 6.97 (m, 2H), 6.93 (s, 1H), 5.40 (dd,  $J = 5.4, 2.4$  Hz, 1H), 3.69 (dd,  $J = 13.3, 5.5$  Hz, 1H), 3.63 (dd,  $J = 13.3, 2.5$  Hz, 1H), 2.31 (s, 3H), 2.11 (s, 3H).  $^{13}\text{C}$  NMR (101 MHz, Chloroform-*d*)  $\delta$  165.49, 144.02, 143.86, 143.29, 134.93, 132.38, 129.23, 128.61, 128.34, 127.73, 127.10, 126.41, 126.29, 123.37, 122.66, 59.86, 32.06, 20.93, 20.66. HRMS (TOF)  $m/z$   $[\text{M} + \text{H}]^+$  Calcd for  $\text{C}_{23}\text{H}_{22}\text{NO}_3\text{SSe}$  472.0480 found 472.0485.

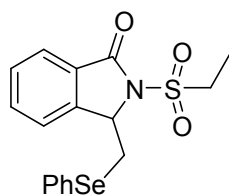

2-(ethylsulfonyl)-3-((phenylselanyl)methyl)isoindolin-1-one (**4k**). White solid (55%, 0.064g).  $^1\text{H}$  NMR (400 MHz, Chloroform-*d*)  $\delta$  7.81 (dd,  $J = 5.7, 2.8$  Hz, 1H), 7.44 – 7.32 (m, 3H), 7.24 – 7.20 (m, 2H), 7.15 – 7.04 (m, 3H), 5.44 (dd,  $J = 5.8, 2.6$  Hz, 1H), 3.69 (dd,  $J = 13.2, 2.7$  Hz, 1H), 3.65 – 3.56 (m, 2H), 3.35 (dd,  $J = 14.3, 7.3$  Hz, 1H), 1.33 (t,  $J = 7.4$  Hz, 3H).  $^{13}\text{C}$  NMR (101 MHz, Chloroform-*d*)  $\delta$  166.62, 143.61, 132.84, 132.15, 128.67, 128.31, 128.16, 128.07, 126.39, 123.84, 122.29, 59.34, 47.92, 31.48, 6.38. HRMS (TOF)  $m/z$   $[\text{M} + \text{H}]^+$  Calcd for  $\text{C}_{17}\text{H}_{18}\text{NO}_3\text{SSe}$  396.0167 found 396.0169.

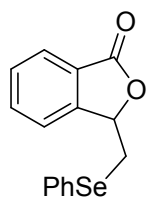

3-((phenylselanyl)methyl)isobenzofuran-1(3H)-one (**5**). Colorless oil (88%, 0.133g).  $^1\text{H}$  NMR (400 MHz, Chloroform-*d*)  $\delta$  7.74 (d,  $J = 7.4$  Hz, 1H), 7.42 (td,  $J = 7.4, 1.3$  Hz, 1H), 7.39 – 7.33 (m, 2H), 7.33 – 7.28 (m, 2H), 7.13 – 7.04 (m, 3H), 5.51 (t,  $J = 5.5$  Hz, 1H), 3.30 (dd,  $J = 13.3, 5.1$  Hz, 1H), 3.22 (dd,  $J = 13.3, 5.9$  Hz, 1H).  $^{13}\text{C}$  NMR (101 MHz, Chloroform-*d*)  $\delta$  170.02 , 148.54 , 133.99 , 133.53 , 129.53 , 129.26 , 129.21 , 127.69 , 126.50 , 125.50 , 122.54 , 79.15 , 31.92 . HRMS (TOF)  $m/z$   $[\text{M} + \text{H}]^+$  Calcd for  $\text{C}_{15}\text{H}_{13}\text{O}_2\text{Se}$  305.0075 found 305.0080.

# 11. <sup>1</sup>H NMR, <sup>13</sup>C NMR and <sup>19</sup>F NMR spectra

Product 3a

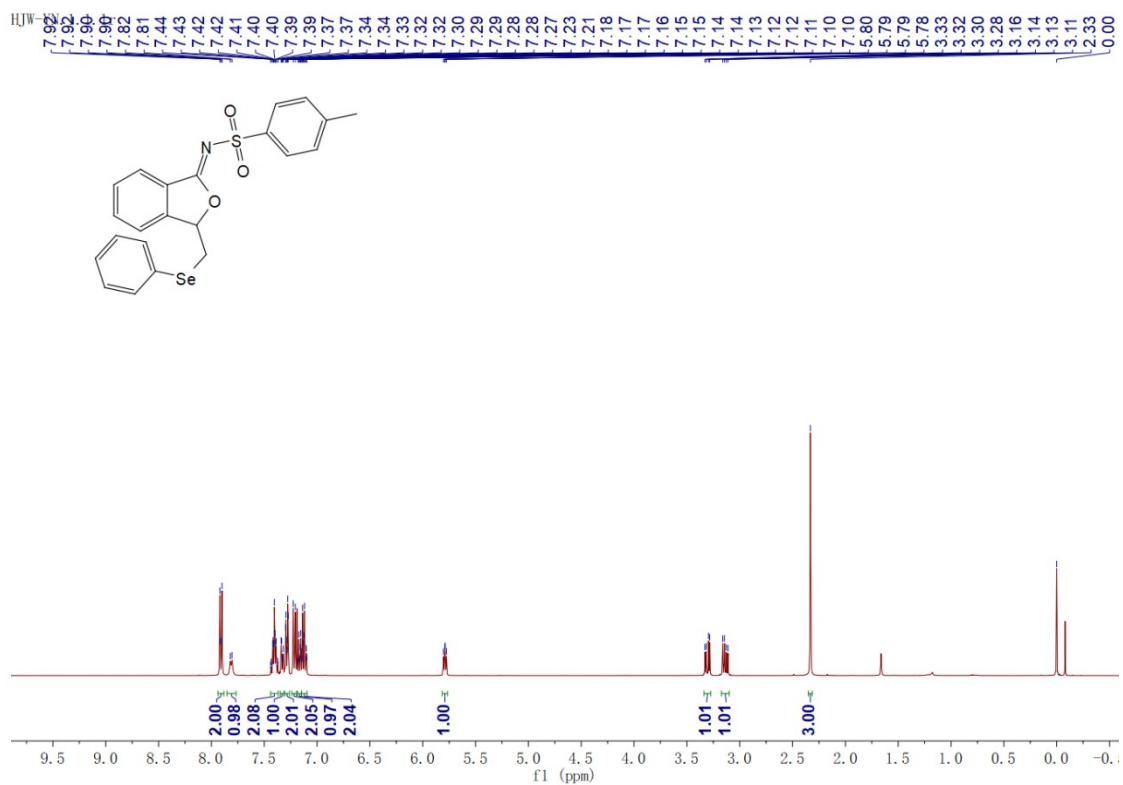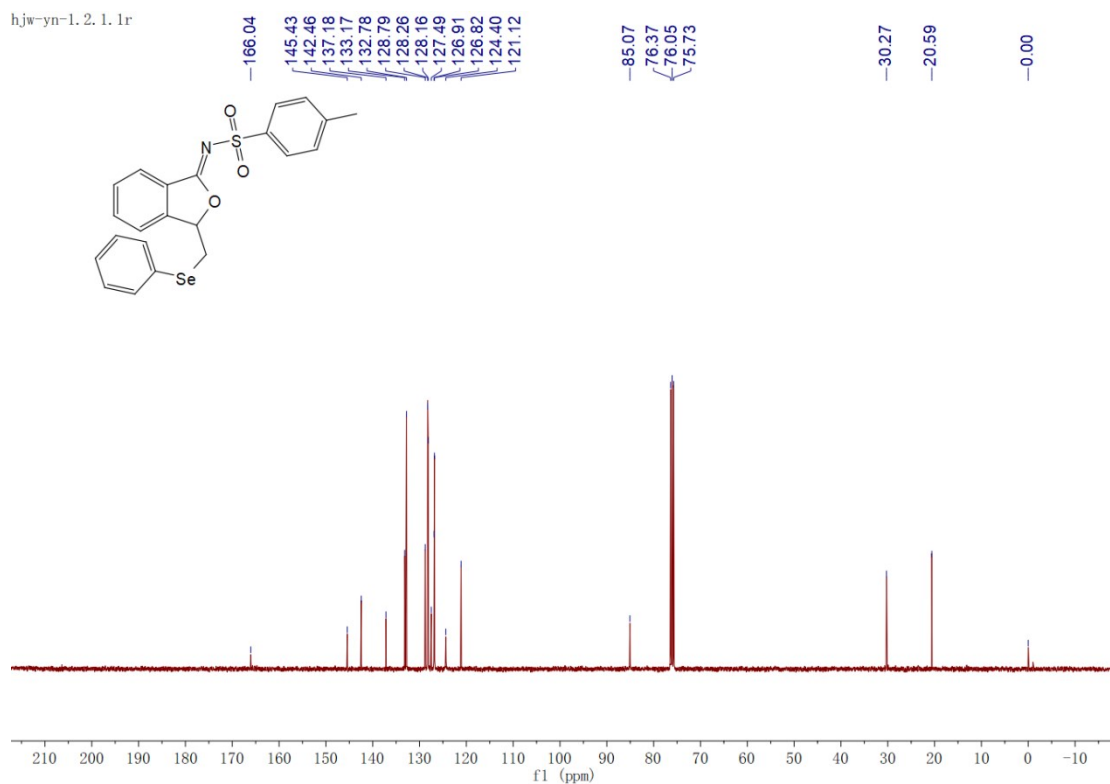

Product 3b

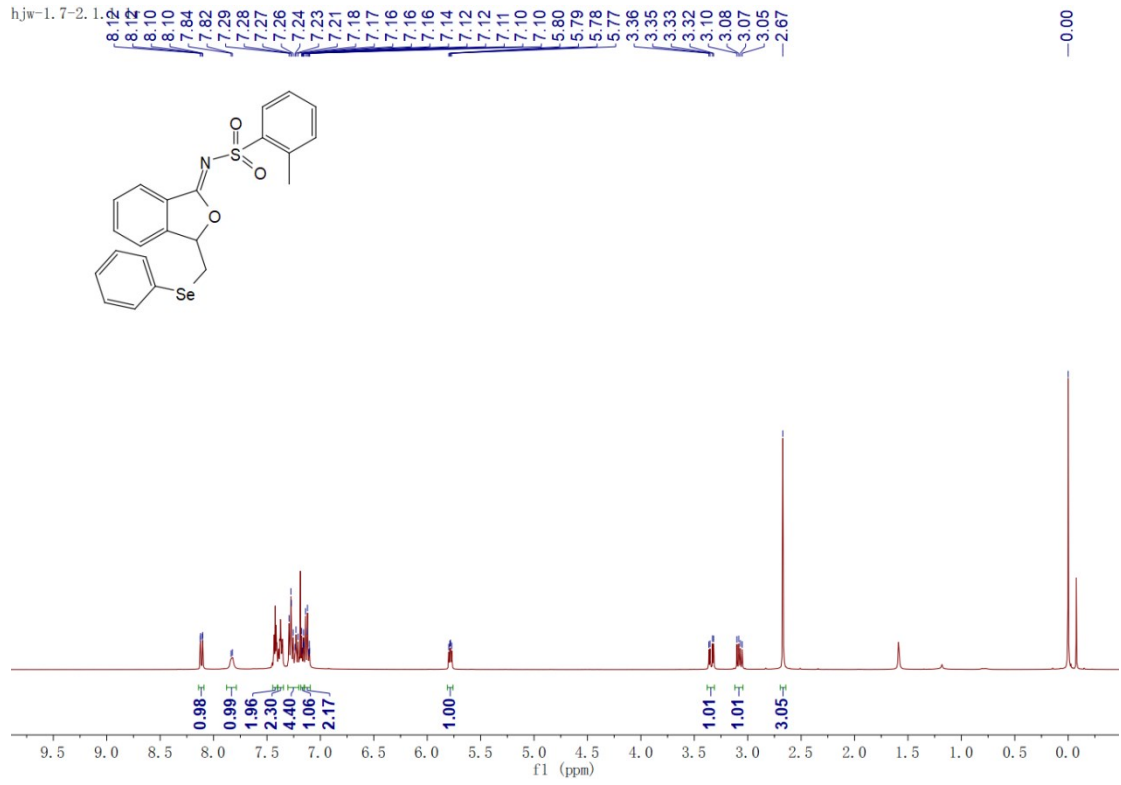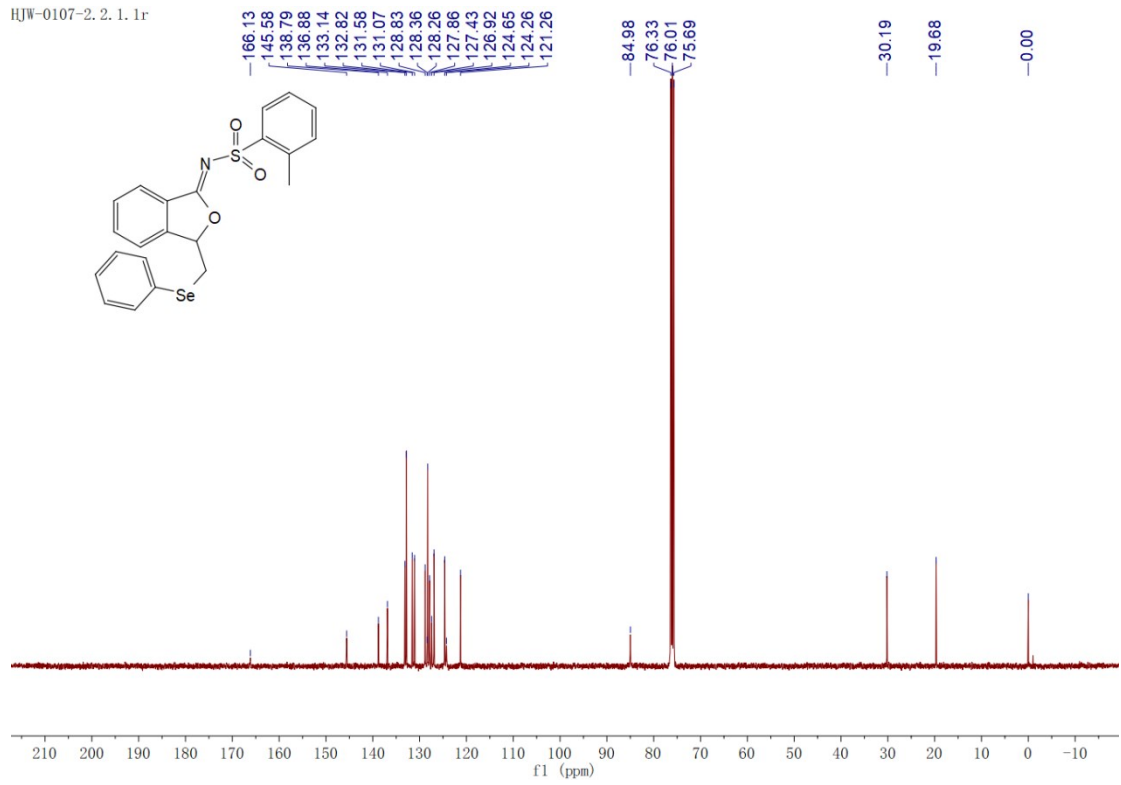

Product 3c

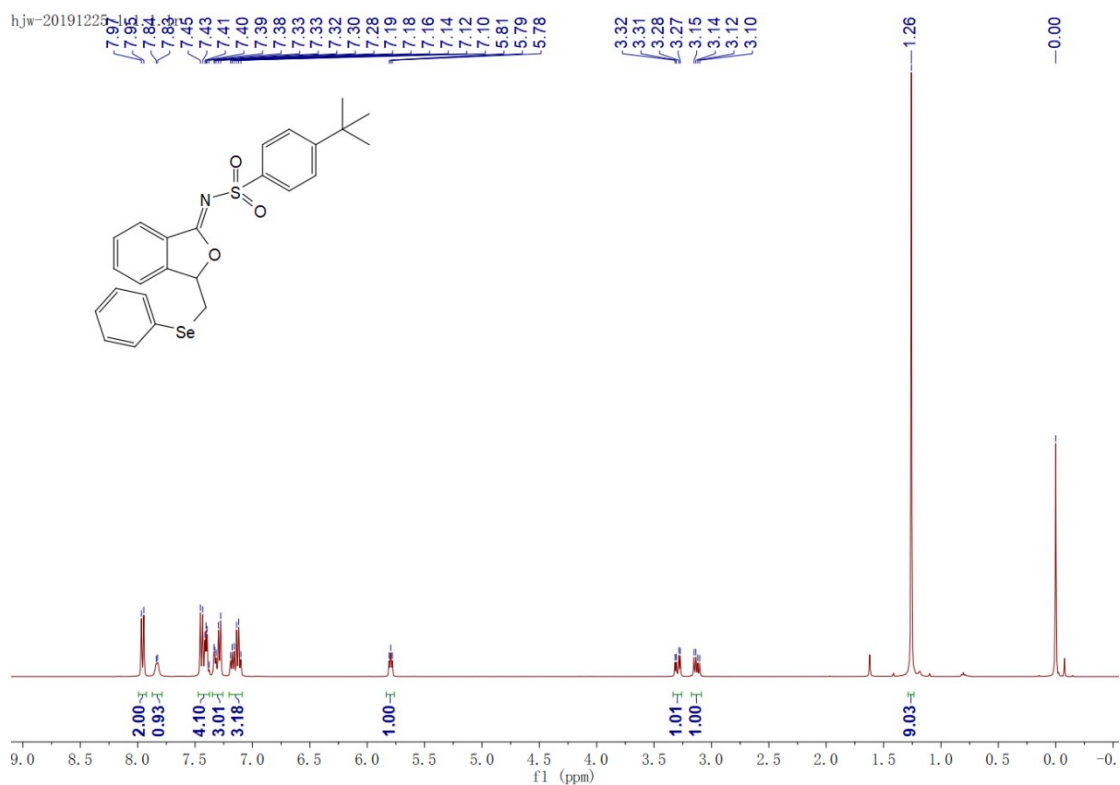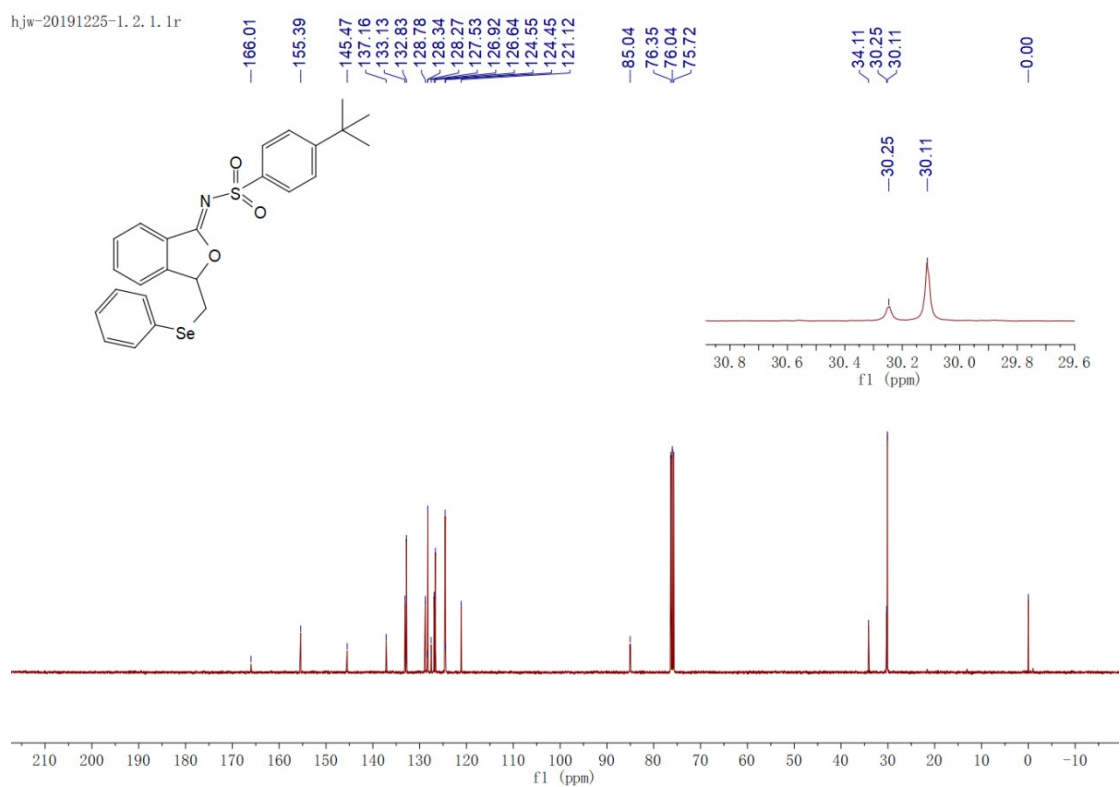

Product 3d

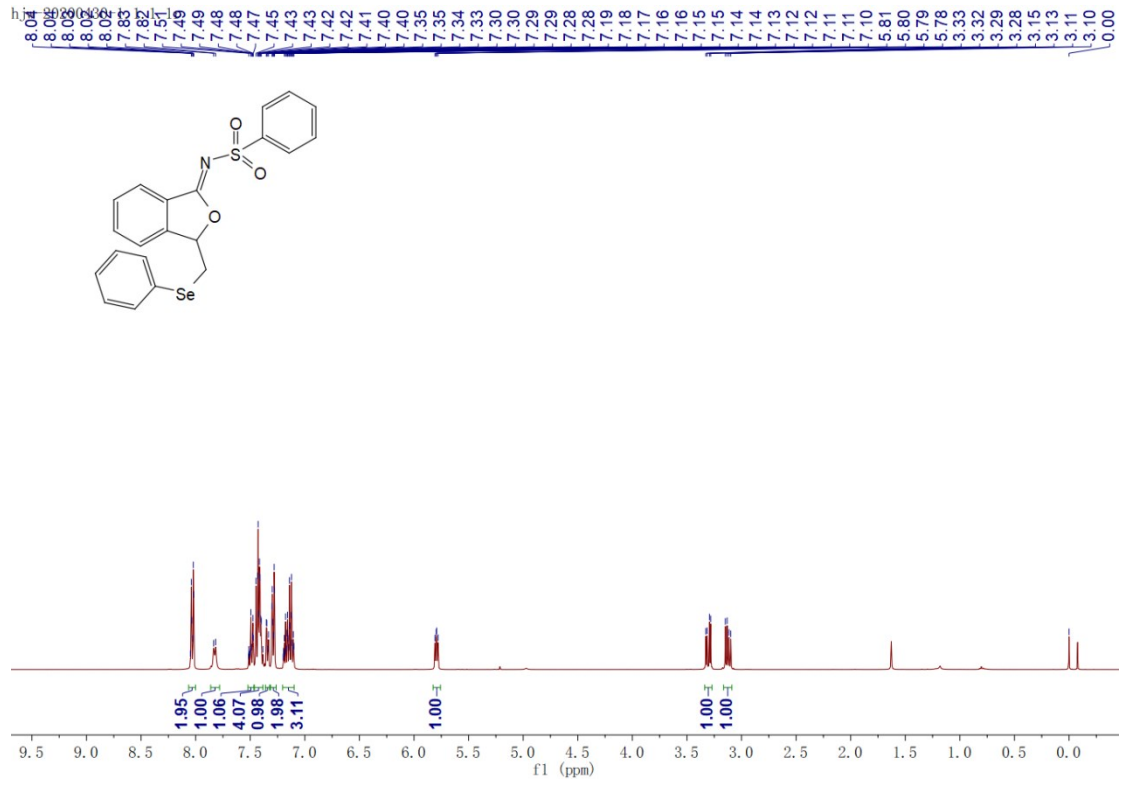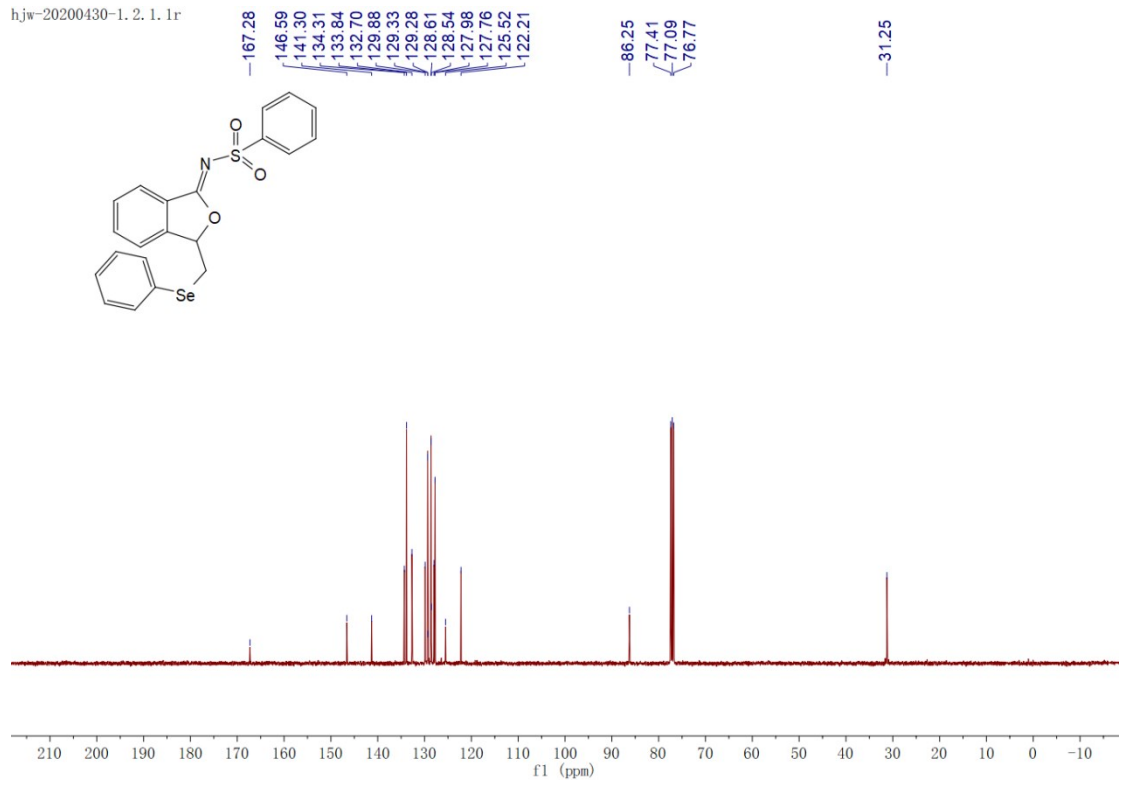

Product 3e

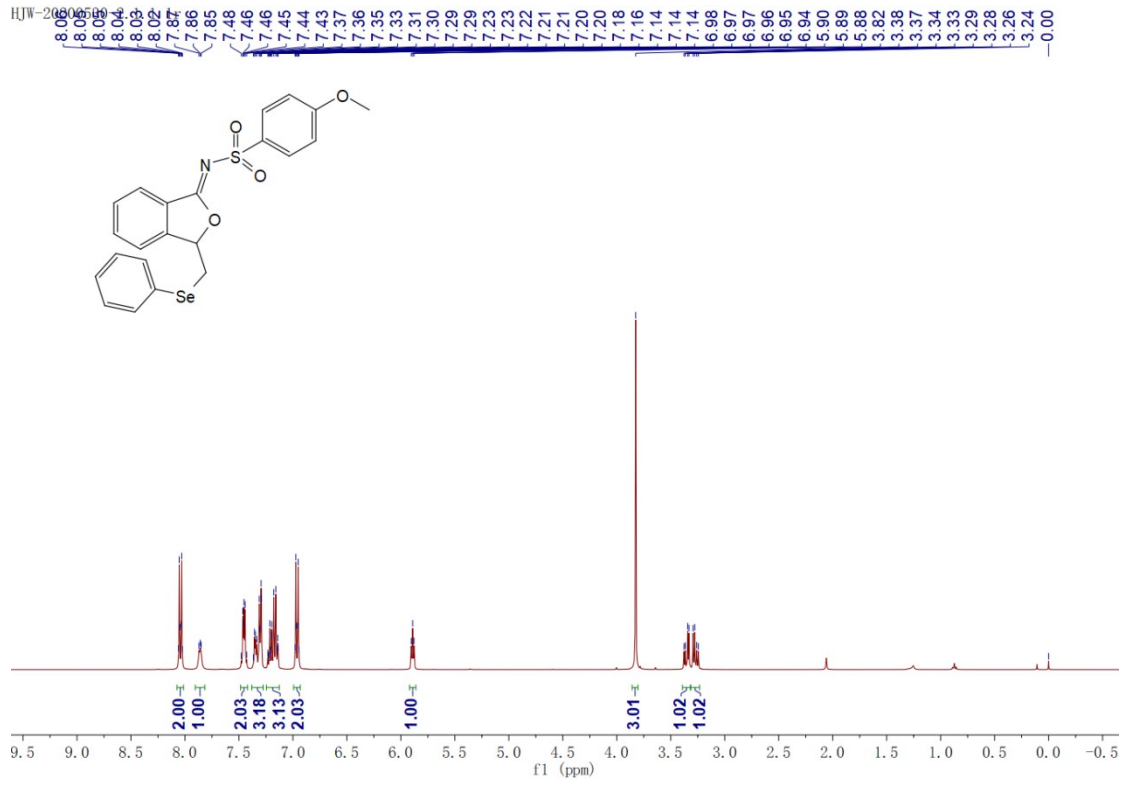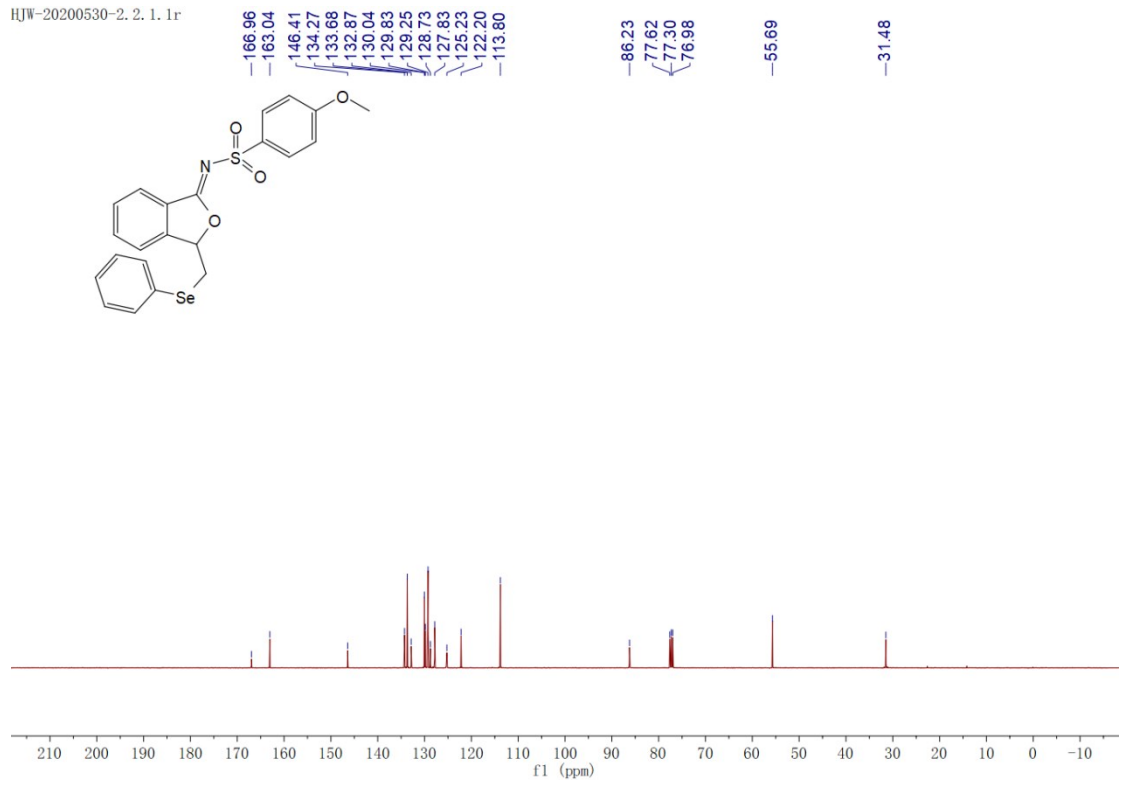



Product 3f

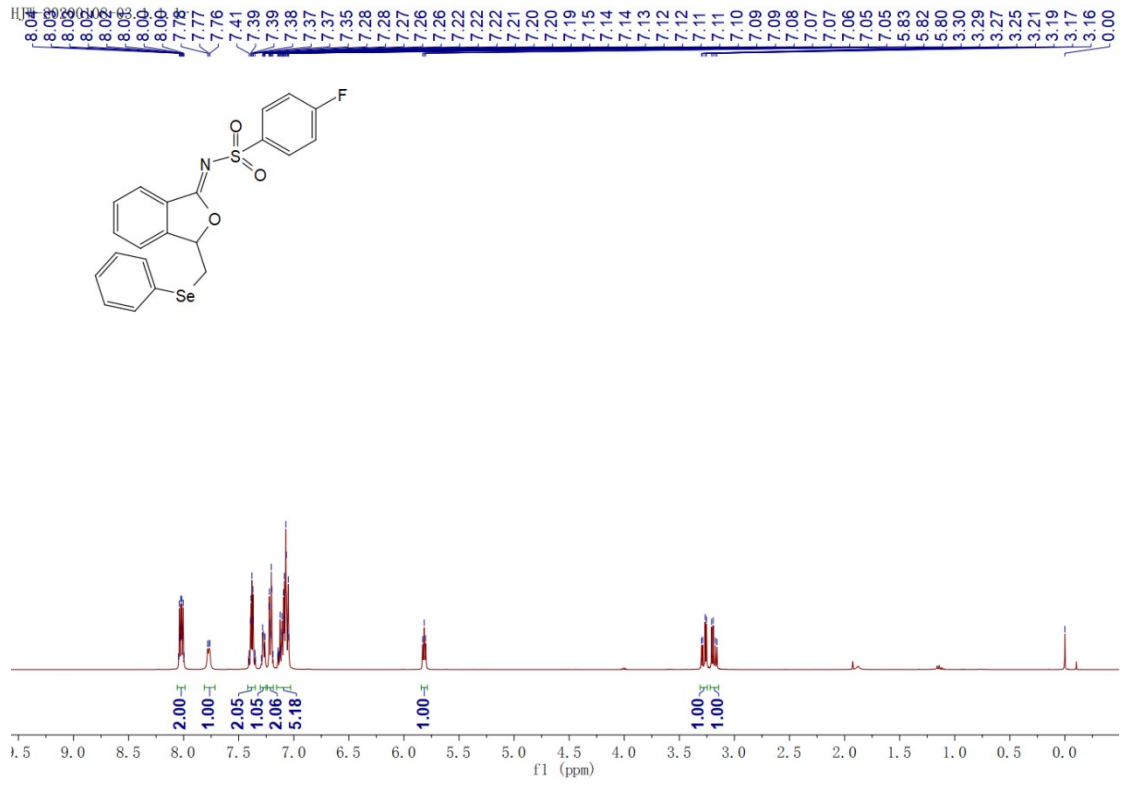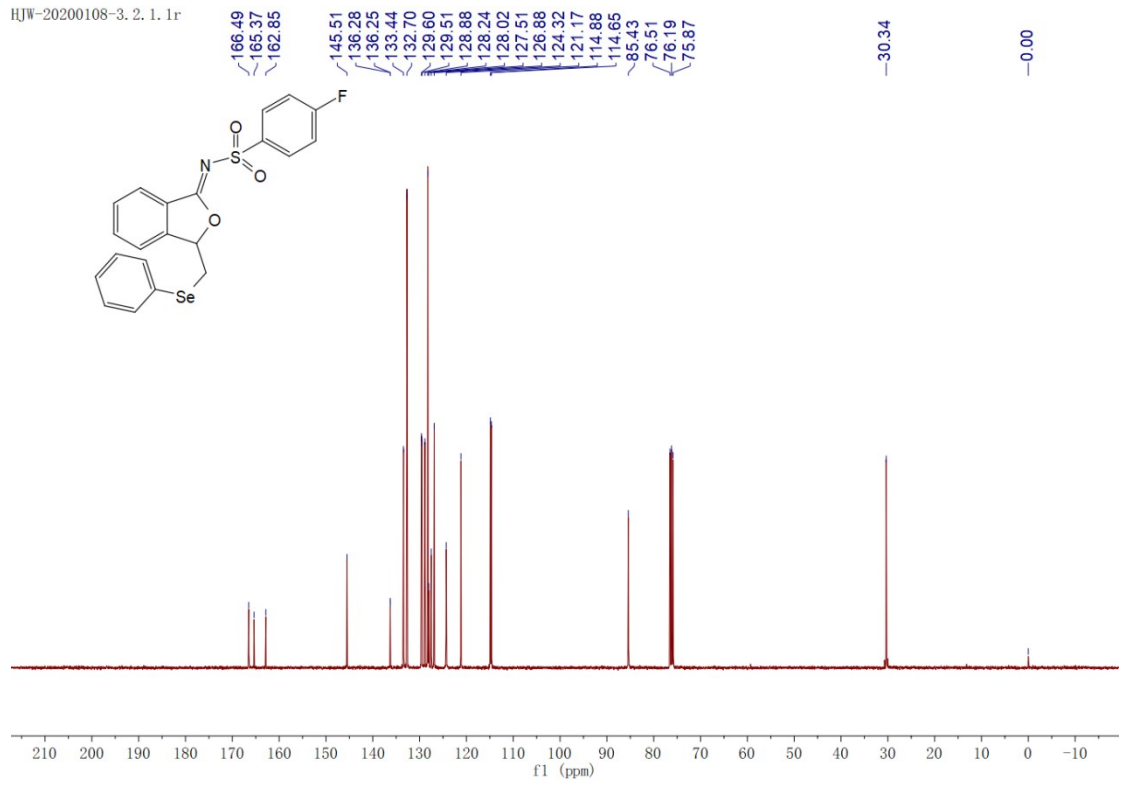

HJW-20200108-3. 7. 1. 1r

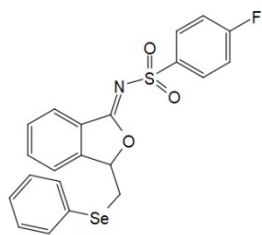

--105.29

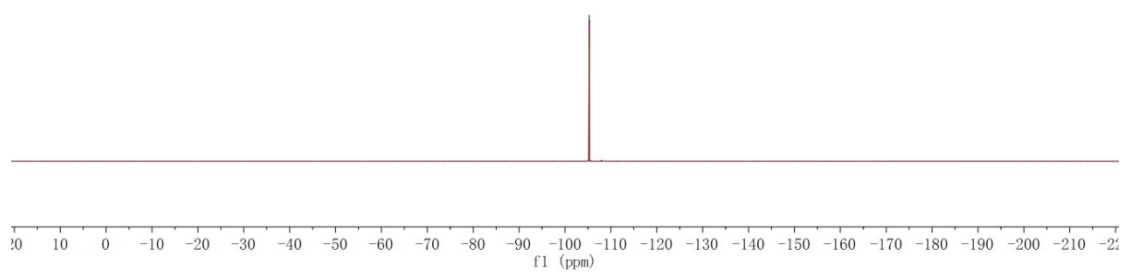

Product 3g

hjlw-20200515-1. 1. 1.

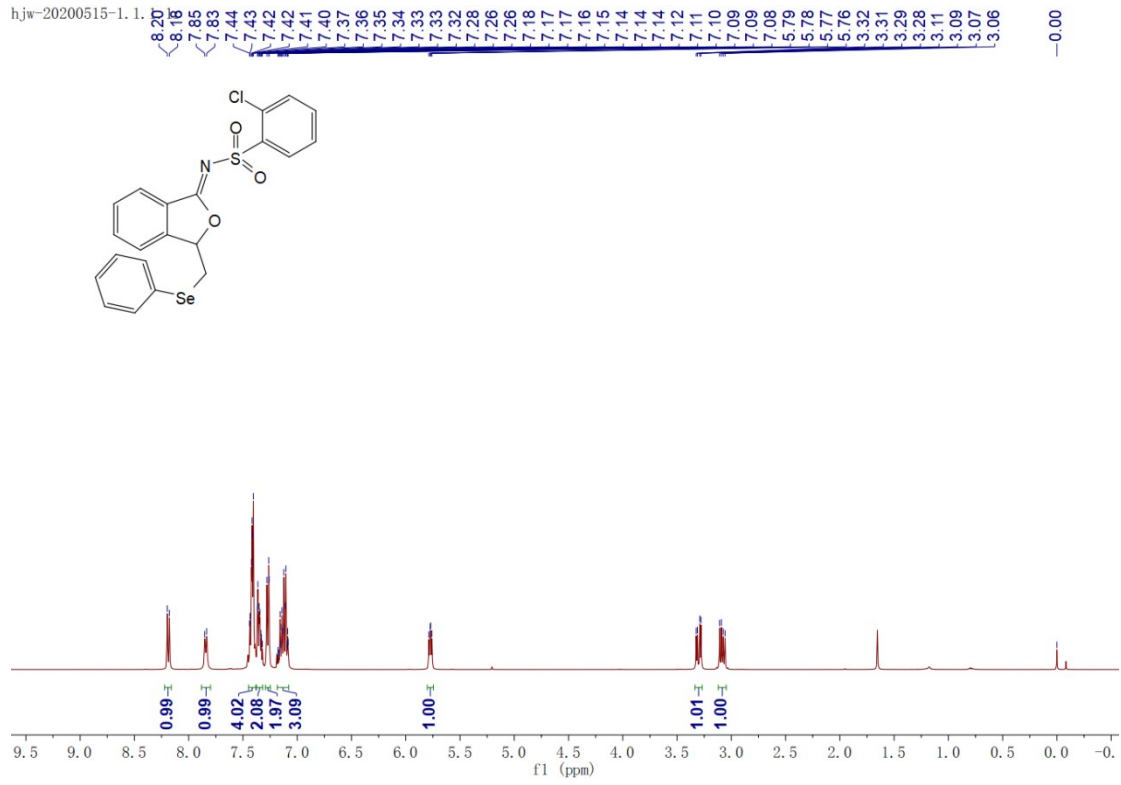

hjlw-20200515-1. 2. 1. 1r

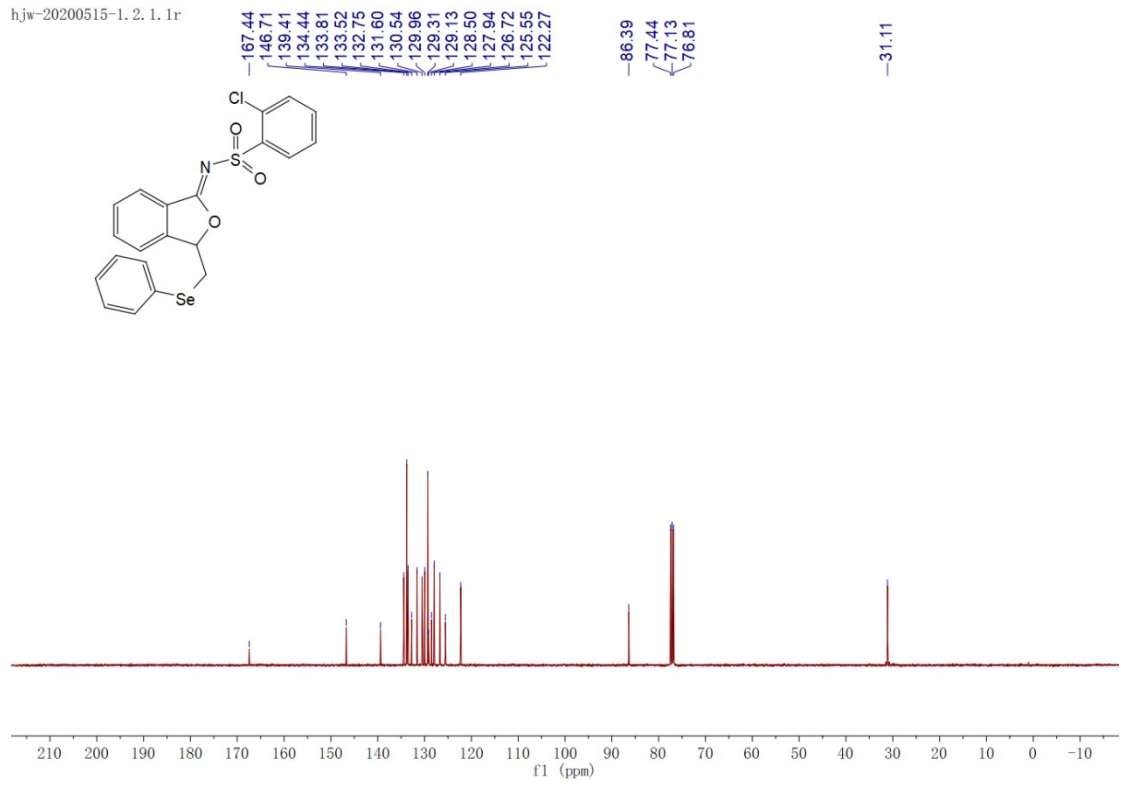

Product 3h

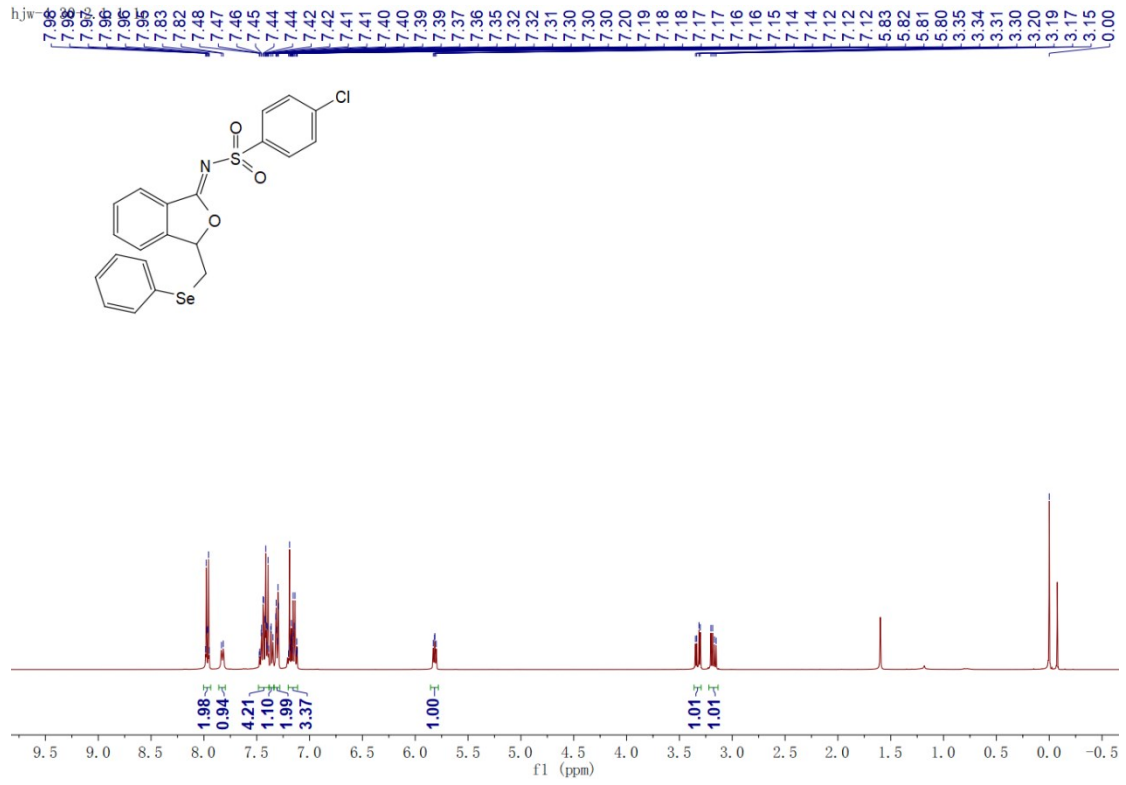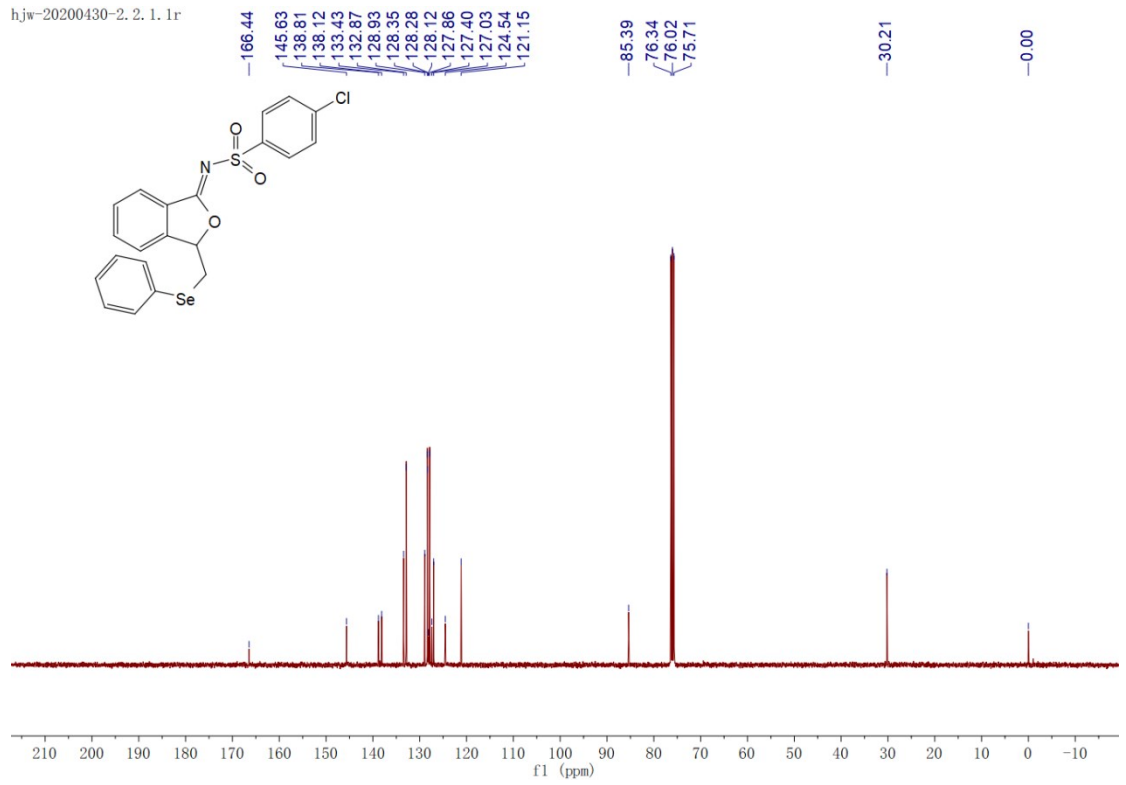

Product 3i

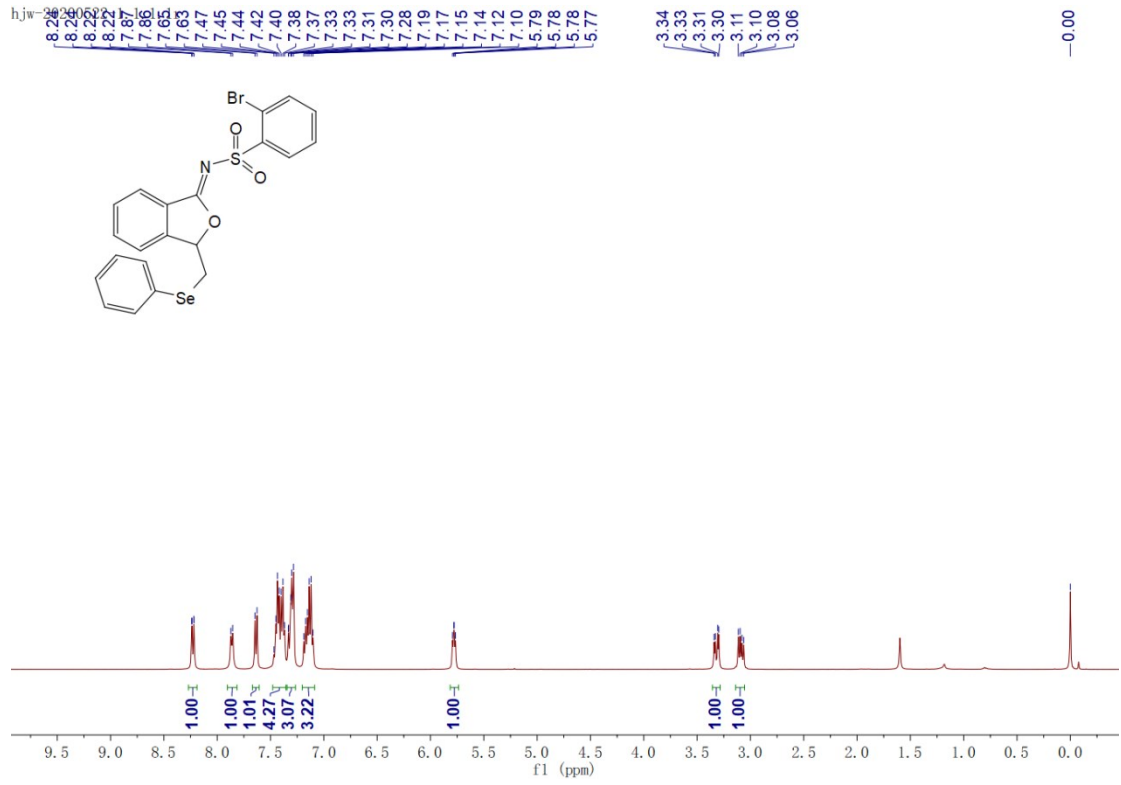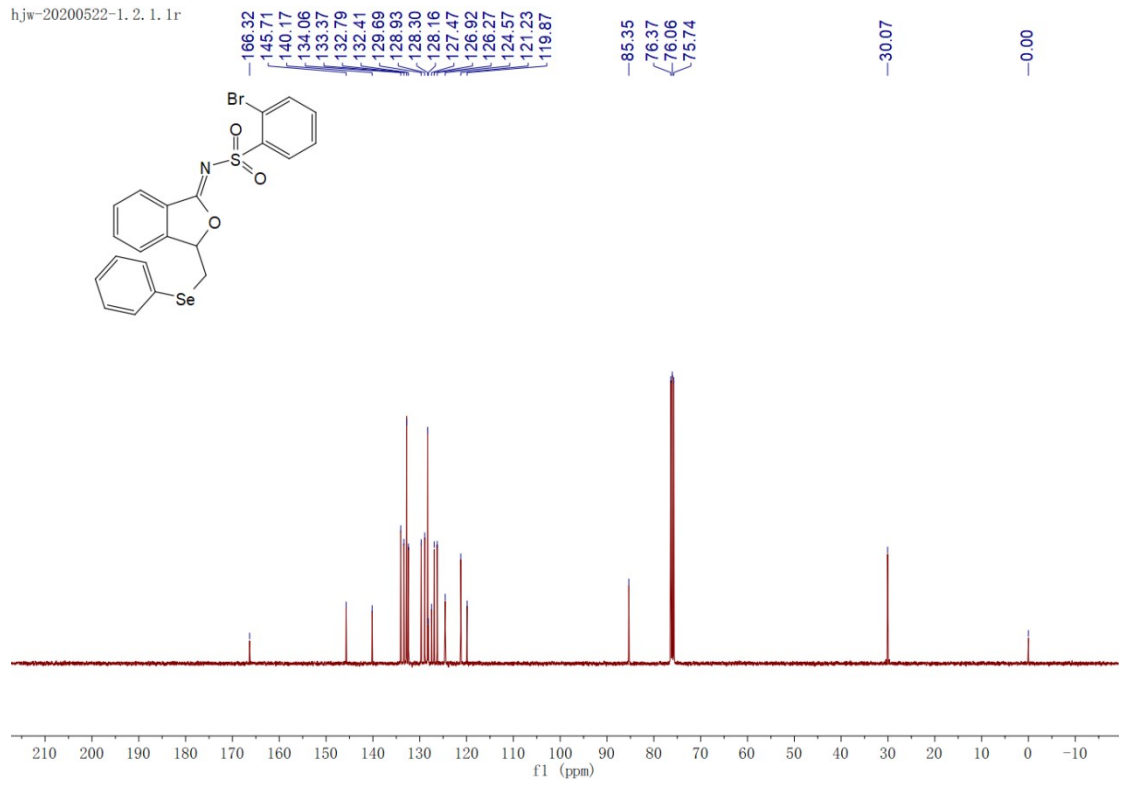

### Product 3j

8.24  
8.24  
8.24  
8.06  
8.04  
8.04  
8.02  
8.02  
8.02  
7.86  
7.85  
7.68  
7.68  
7.67  
7.67  
7.66  
7.66  
7.65  
7.65  
7.48  
7.47  
7.47  
7.46  
7.46  
7.41  
7.39  
7.37  
7.36  
7.35  
7.35  
7.34  
7.30  
7.30  
7.29  
7.29  
7.28  
7.28  
7.27  
7.21  
7.19  
7.19  
7.18  
7.17  
7.16  
7.15  
7.13  
5.94  
5.93  
5.91  
3.39  
3.37  
3.36  
3.30  
3.29  
3.27

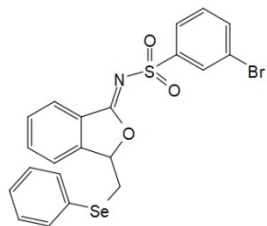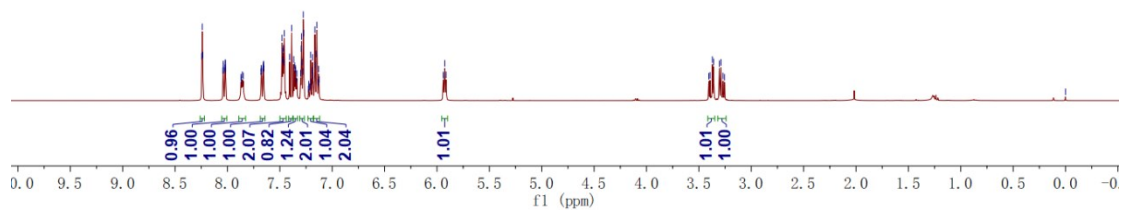

HJW-20200613-3. 2. 1. 1r

167.95  
146.64  
143.01  
135.75  
134.64  
133.67  
130.74  
130.37  
129.97  
129.27  
128.91  
128.62  
127.88  
126.42  
125.35  
122.45  
122.28

86.64  
77.66  
77.34  
77.02

31.39

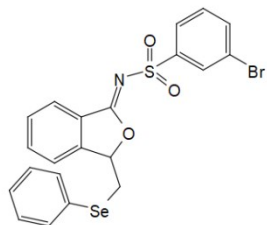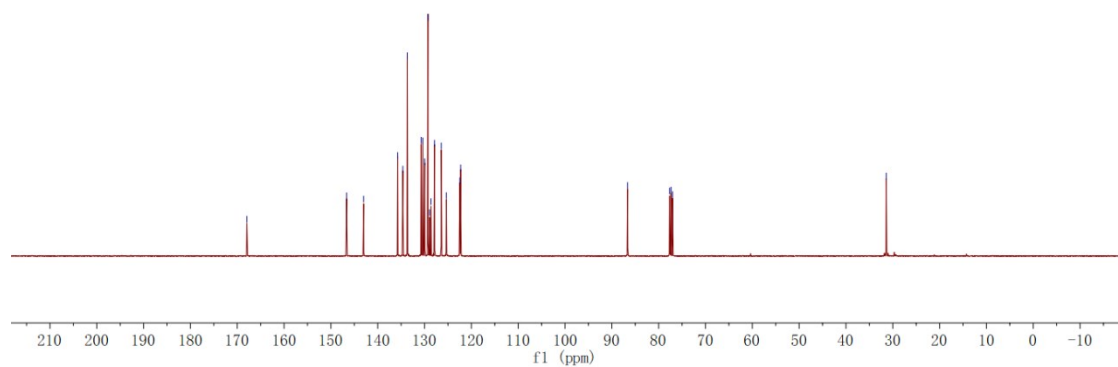

Product 3k

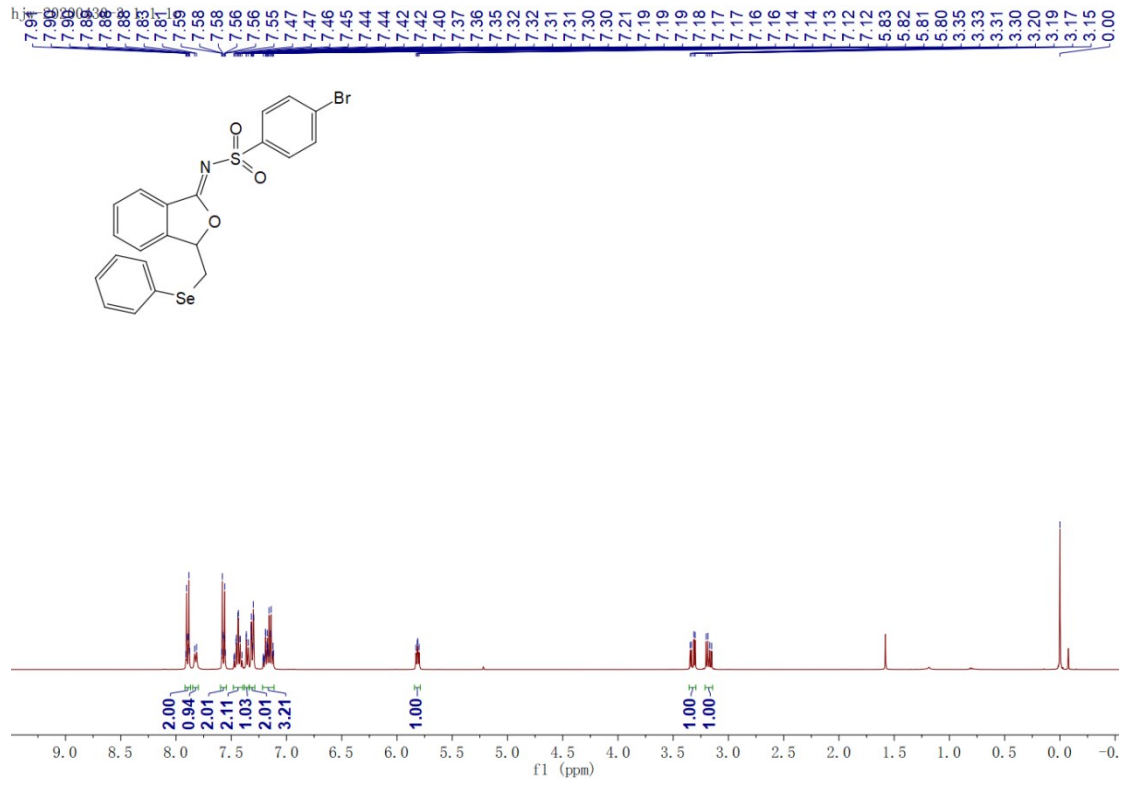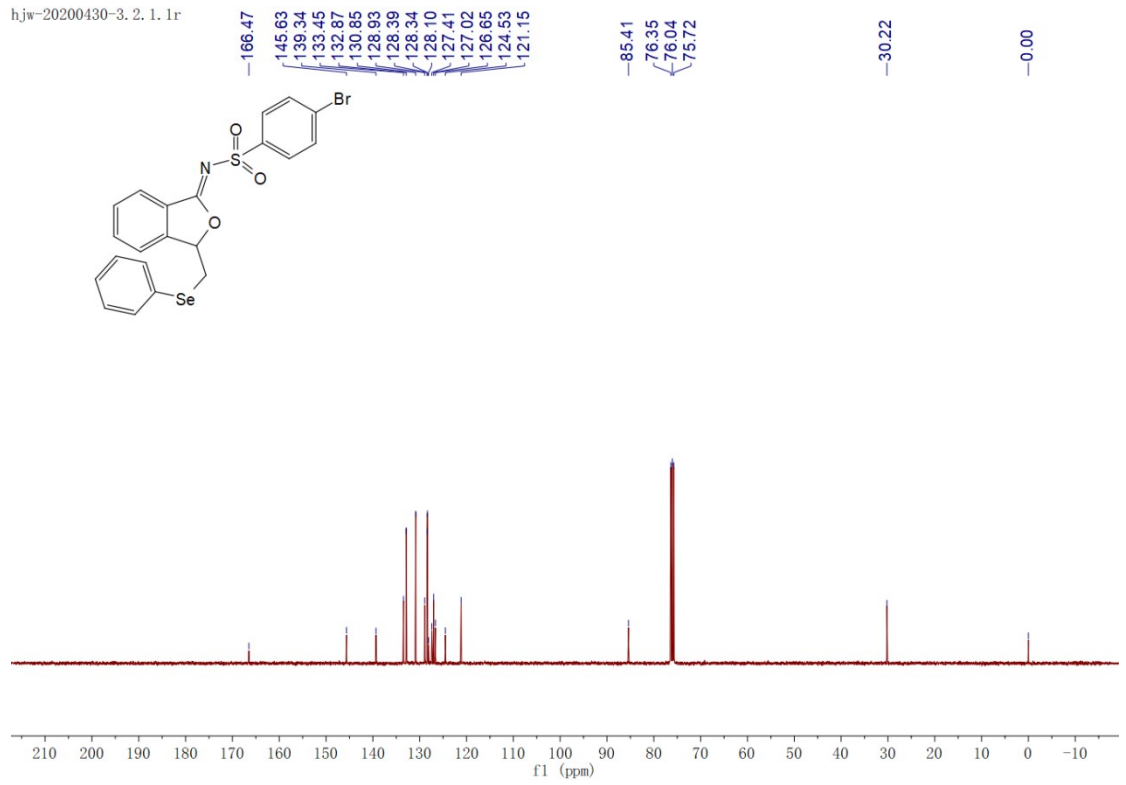

Product 3I

hjlw-20200529-1. 1. 1. 1r

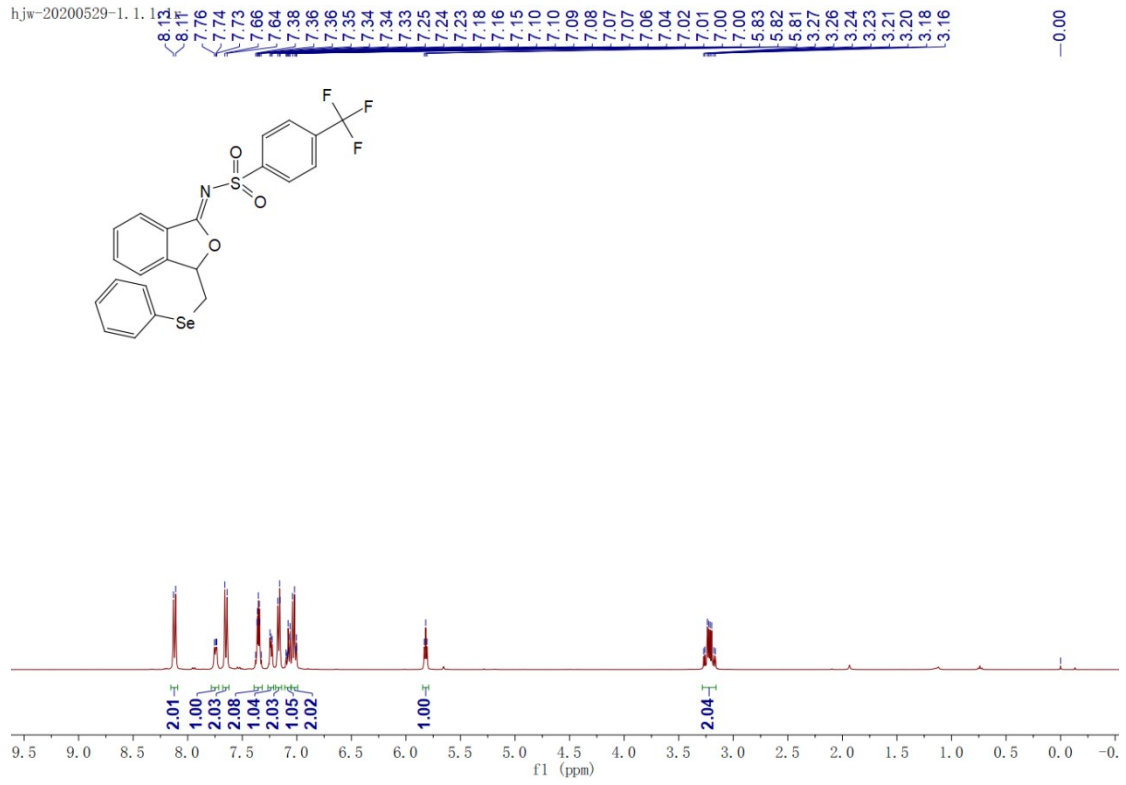

-0.00

hjlw-20200529-1. 2. 1. 1r

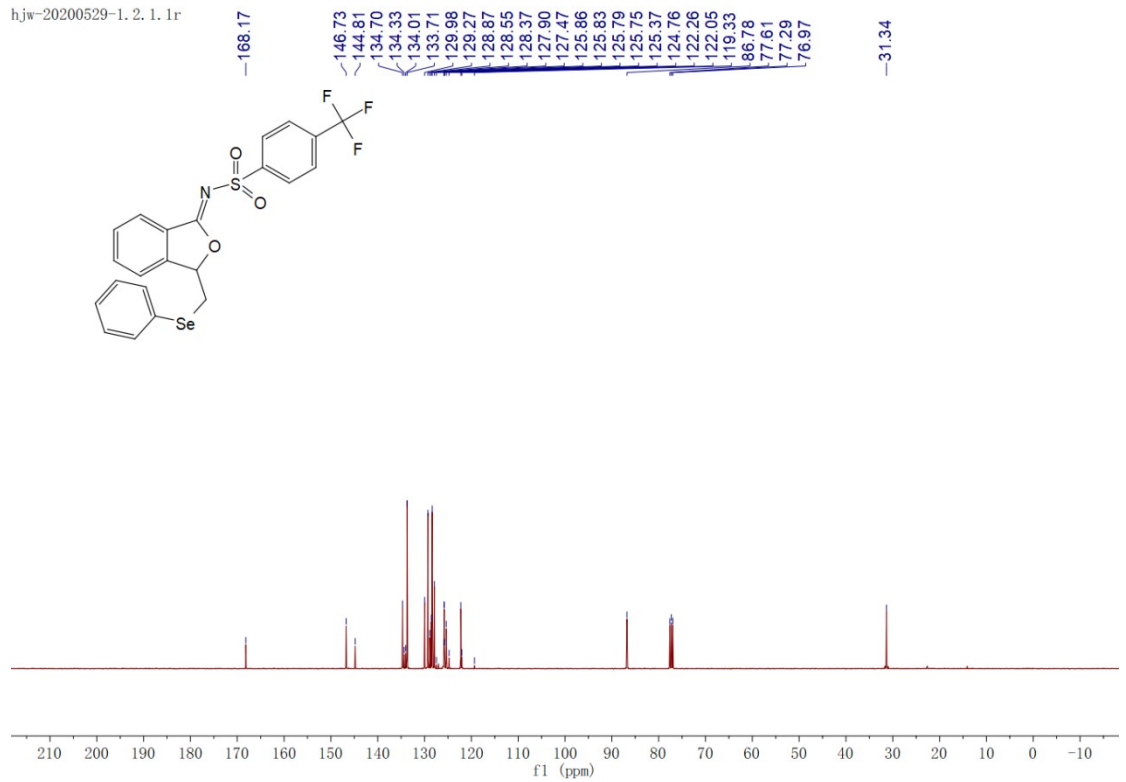



hju-20200529-1.7.1.1r

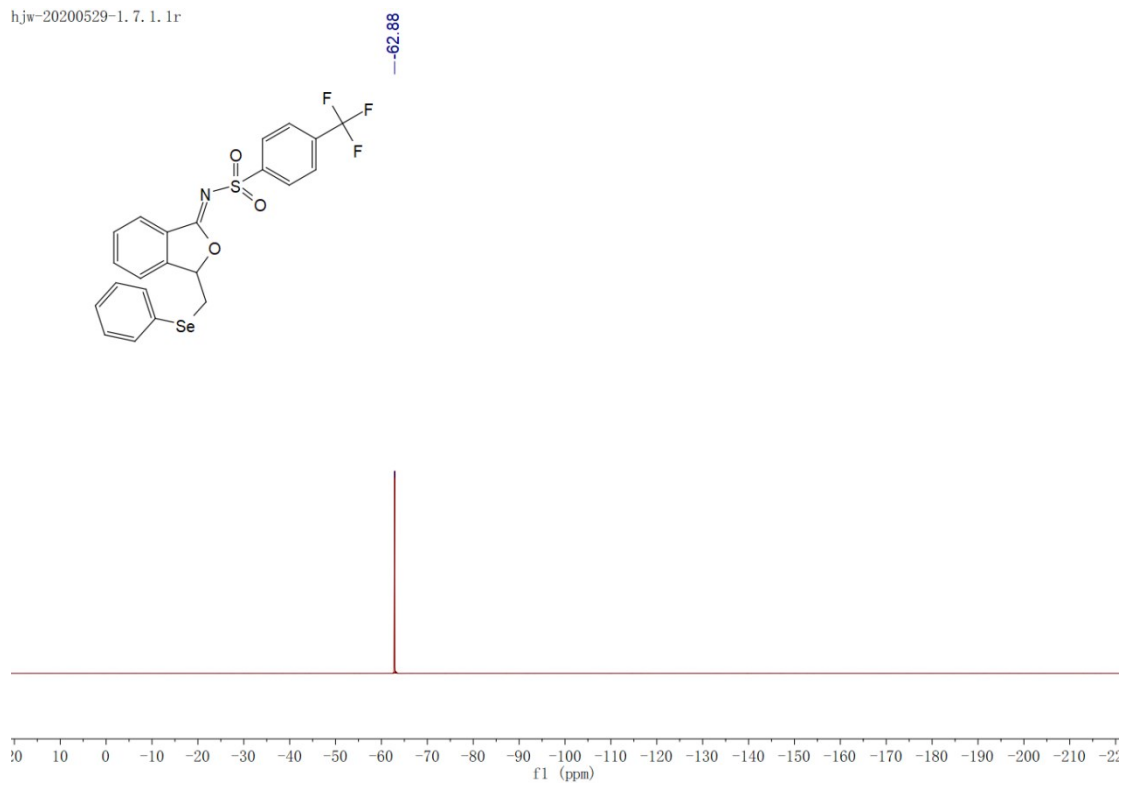



hju-20200516-2-f. 7. 1. 1r

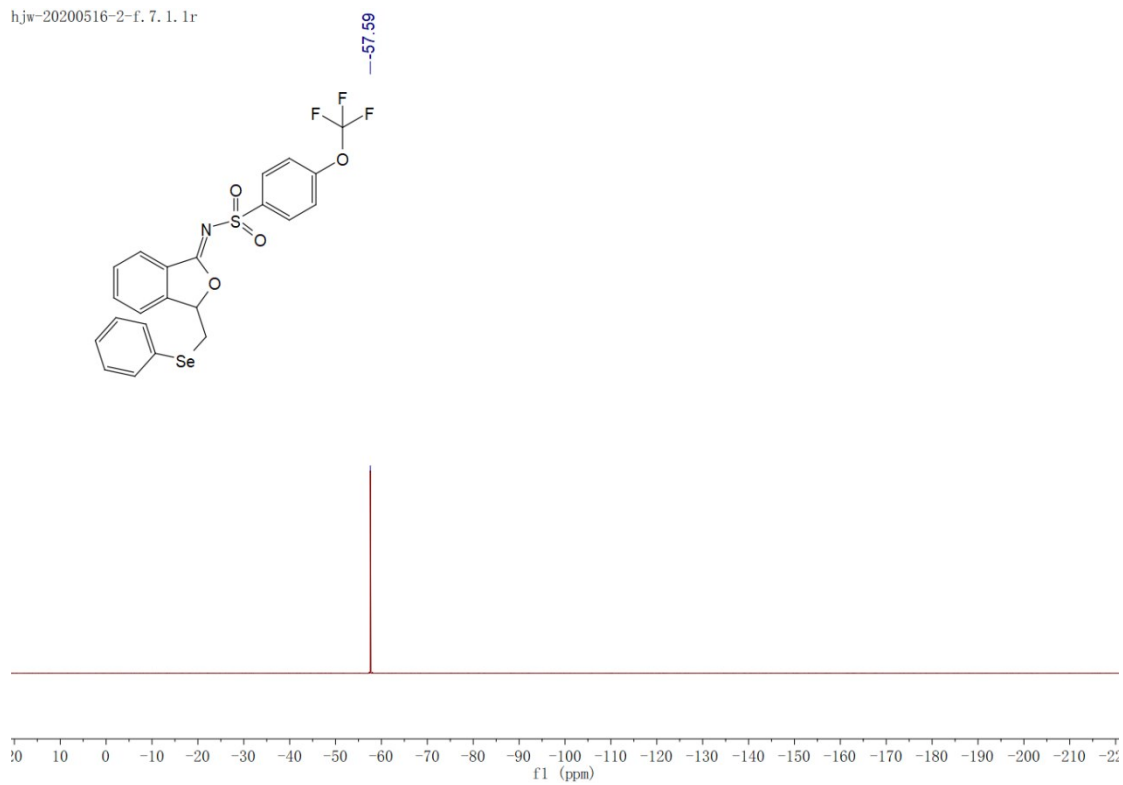

Product 3n

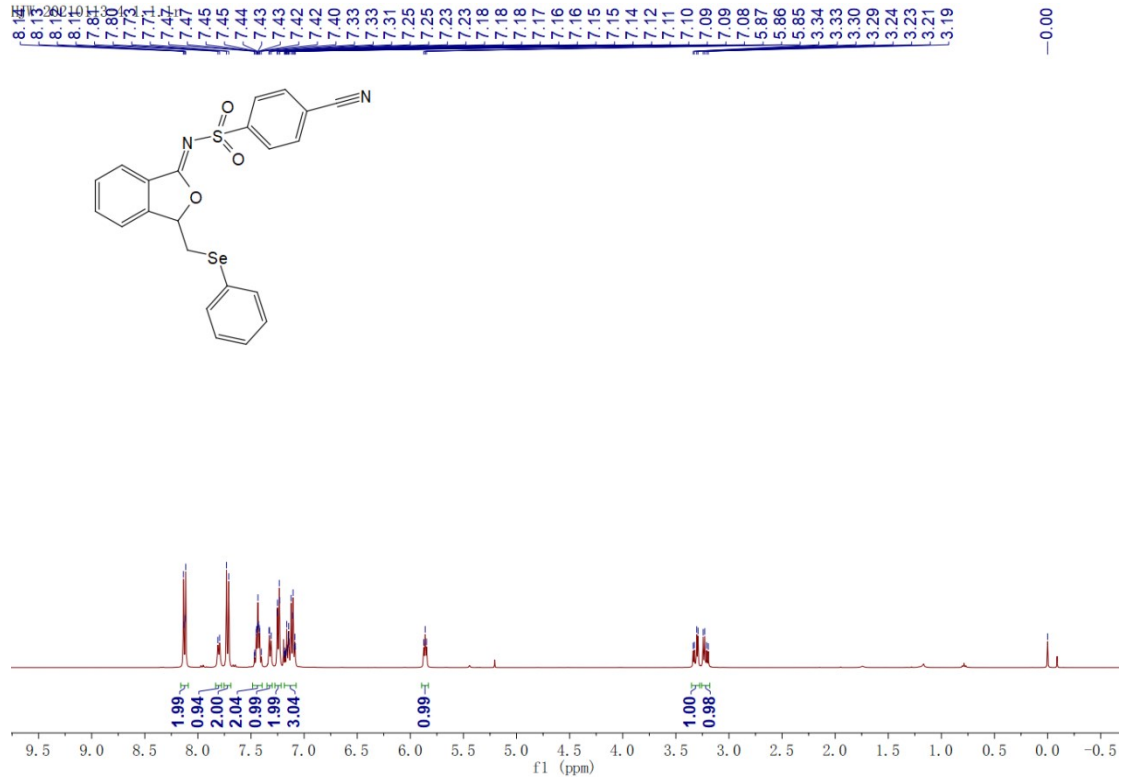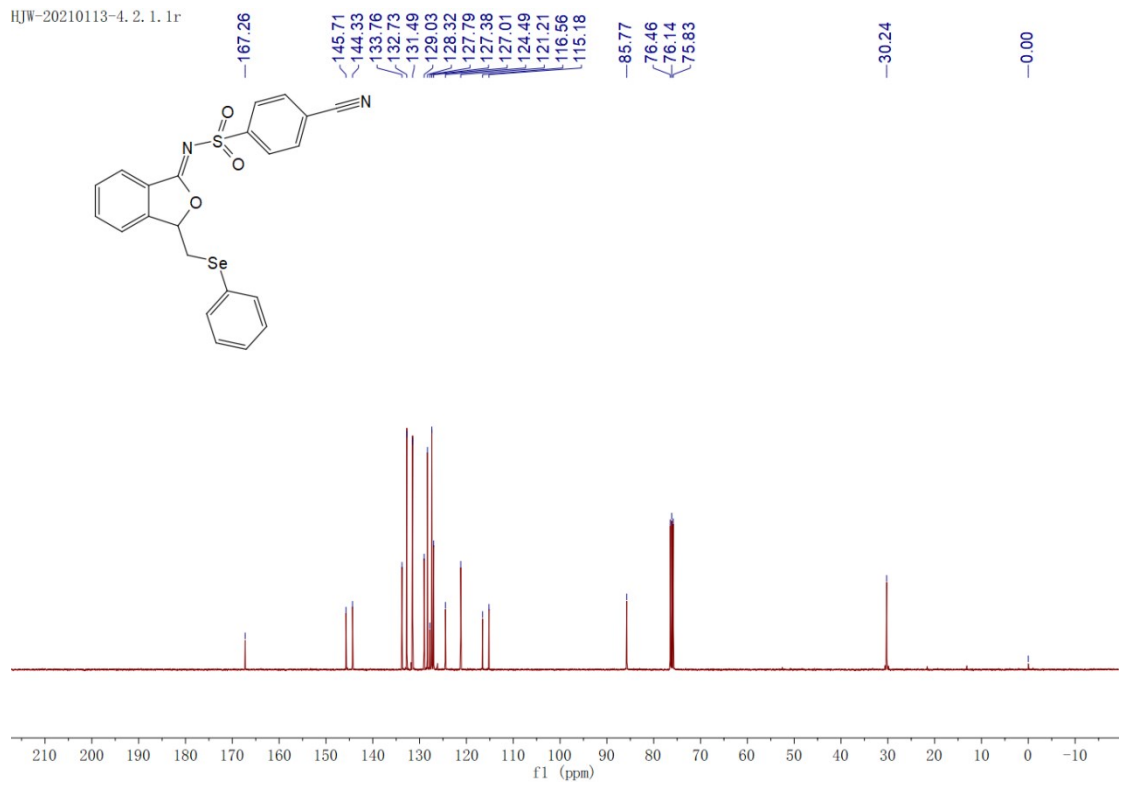

Product 3o

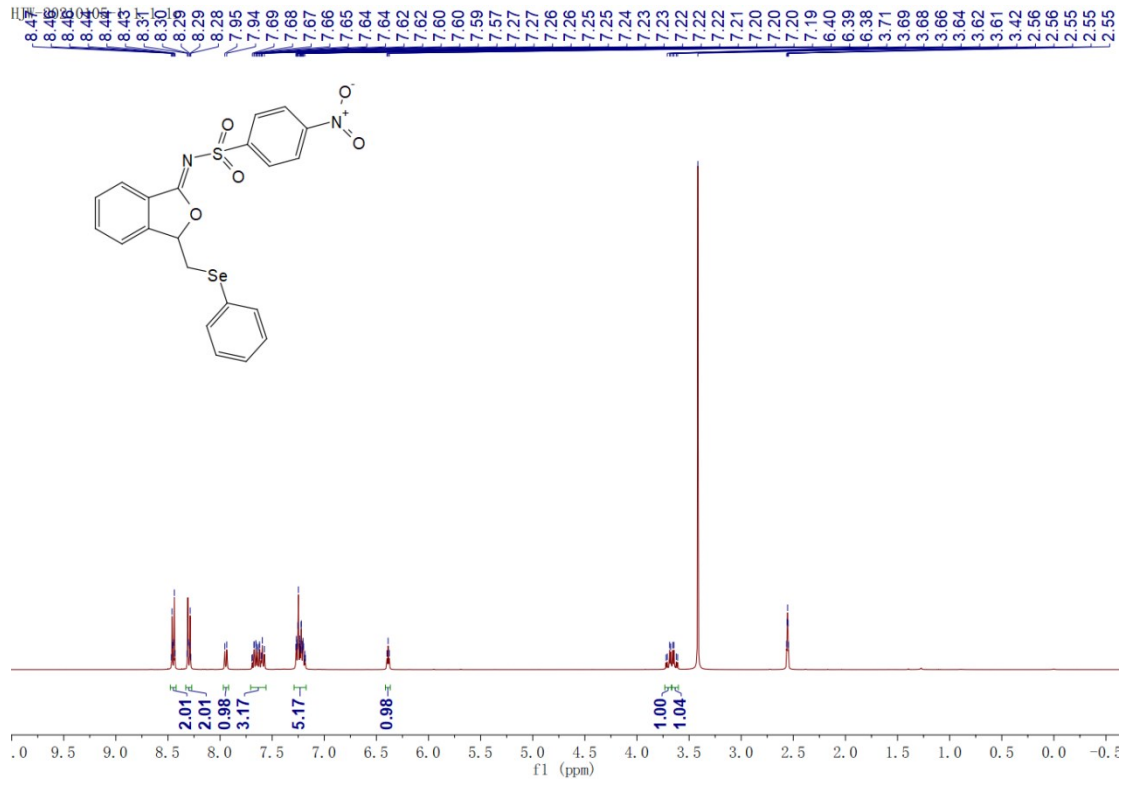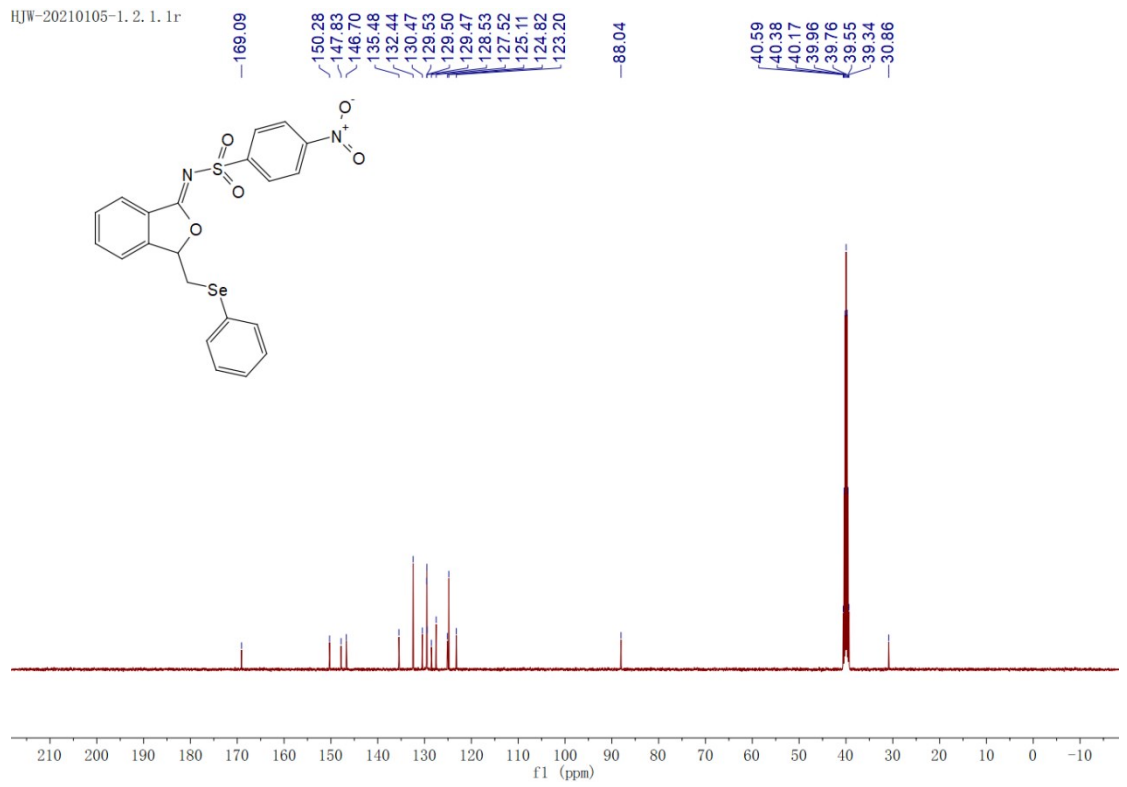

### Product 3p

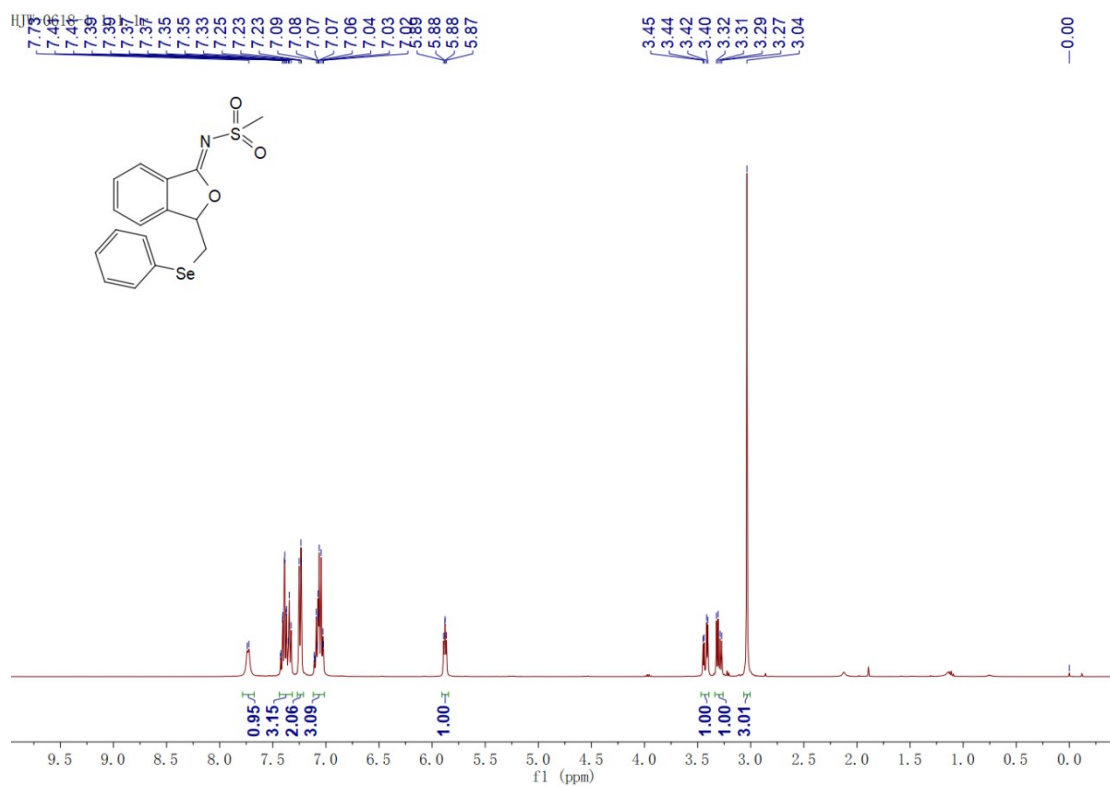

HJW-0618-1. 2. 1. 1r

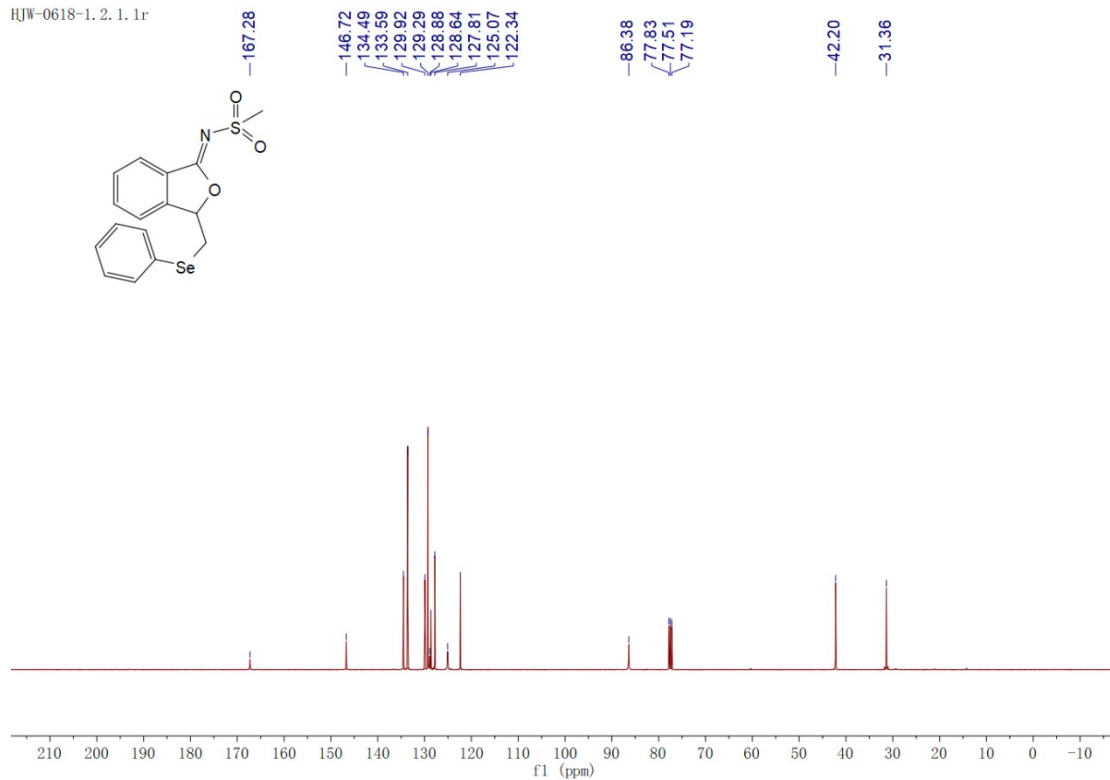

Product 3q

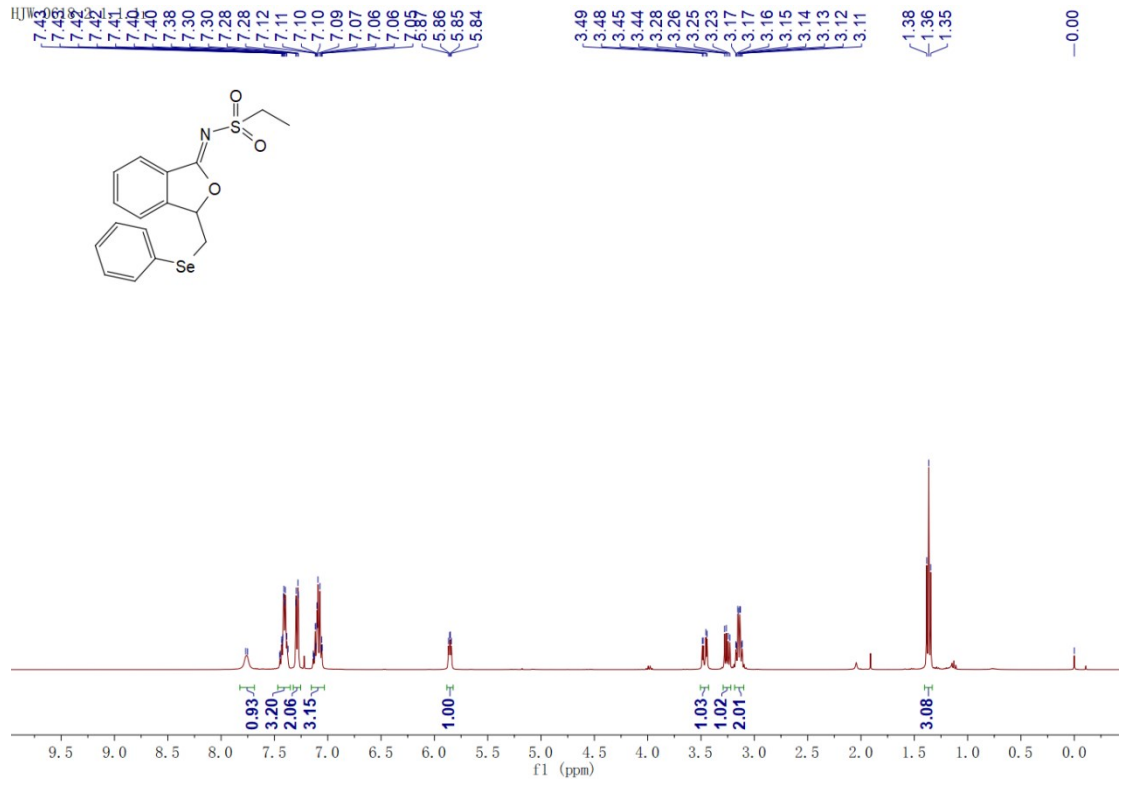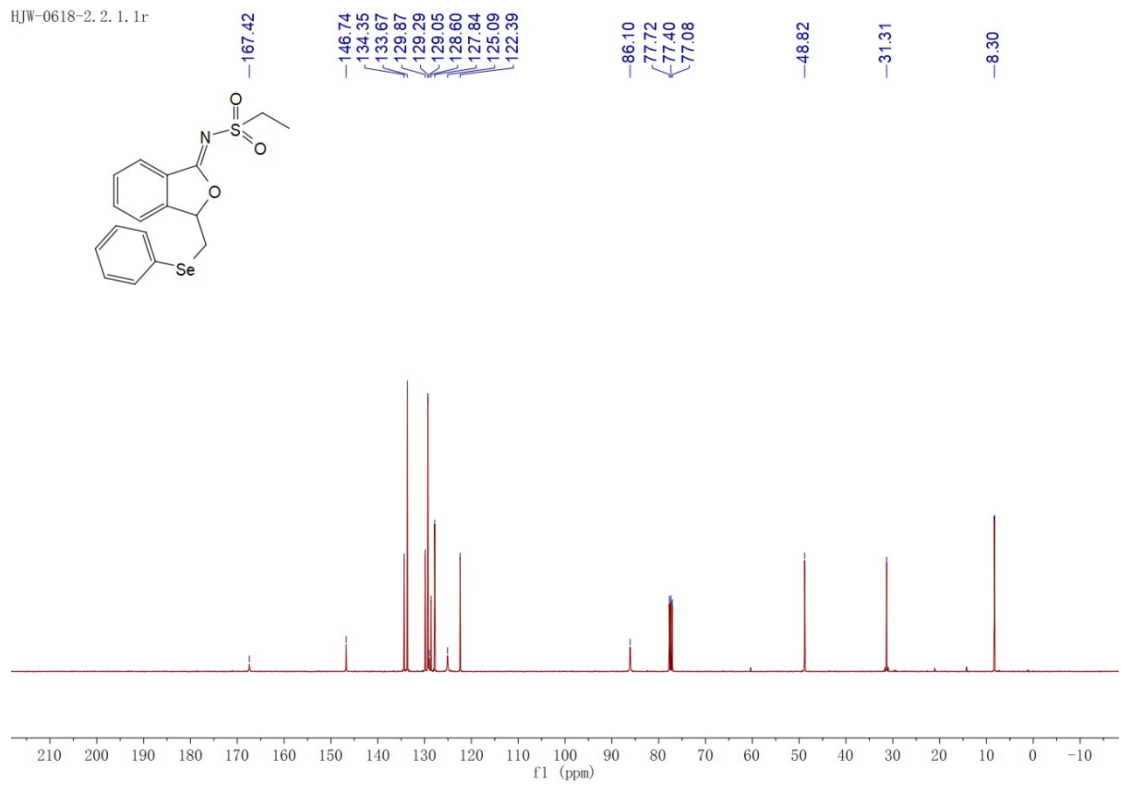

Product 3r

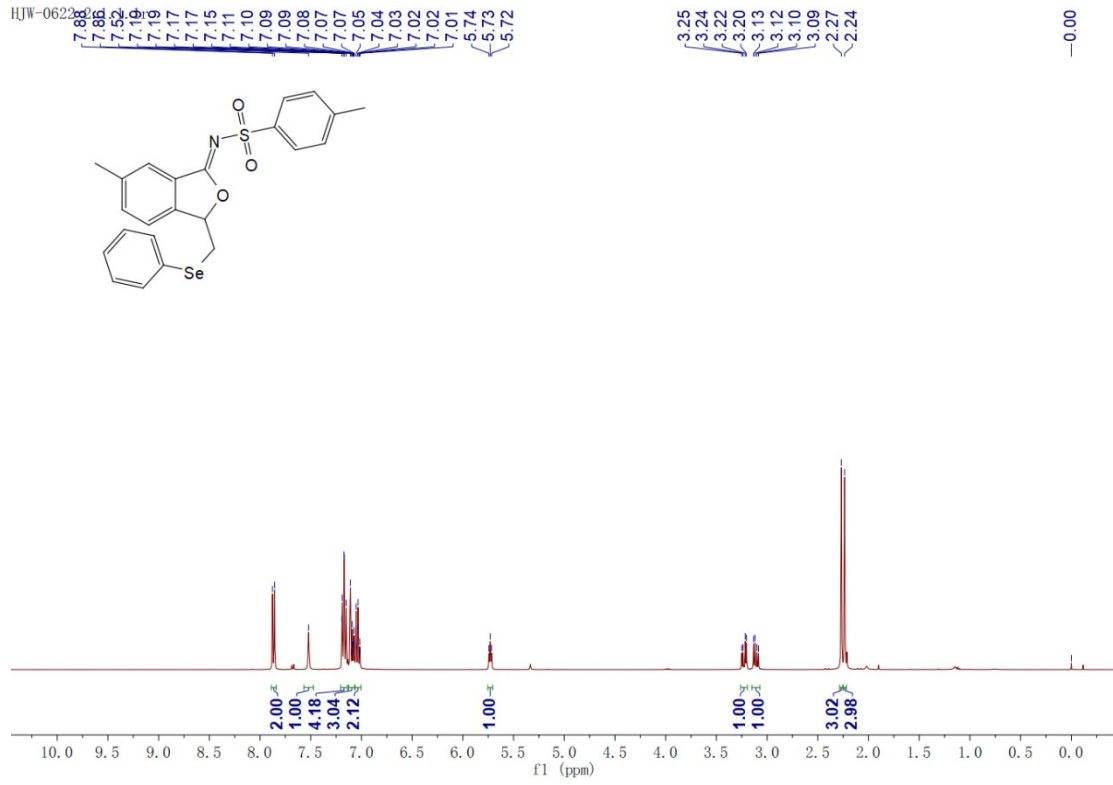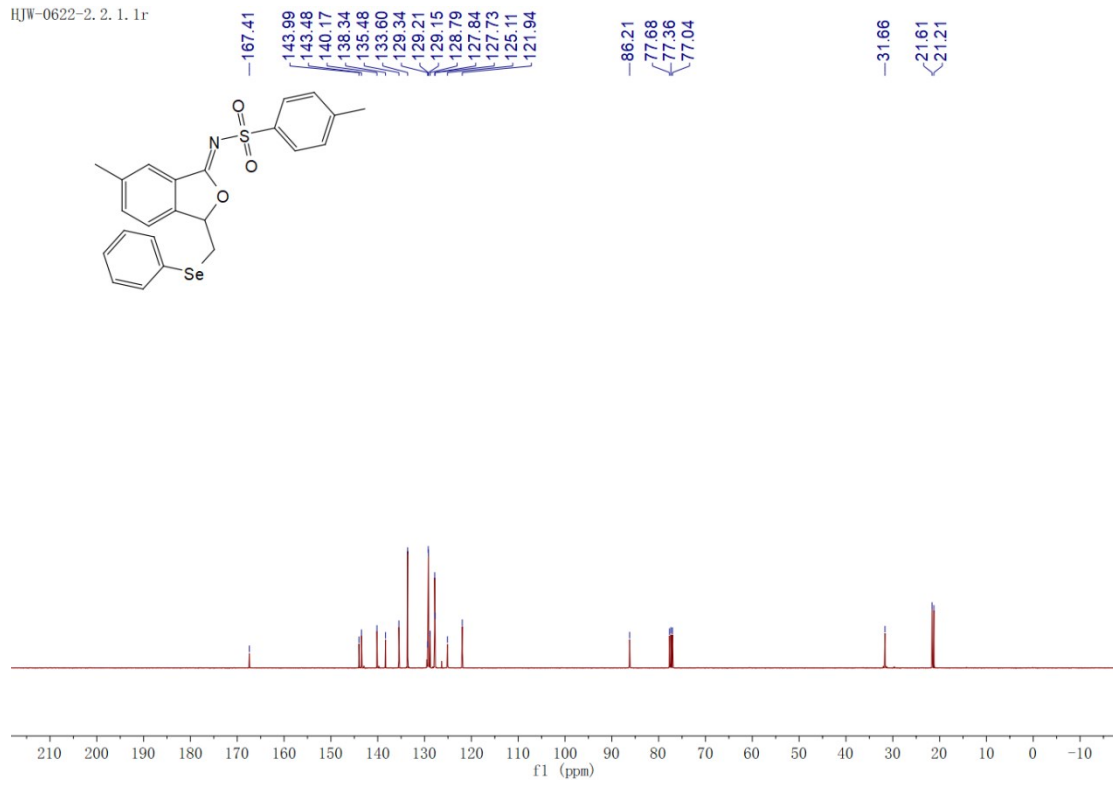



Product 3s

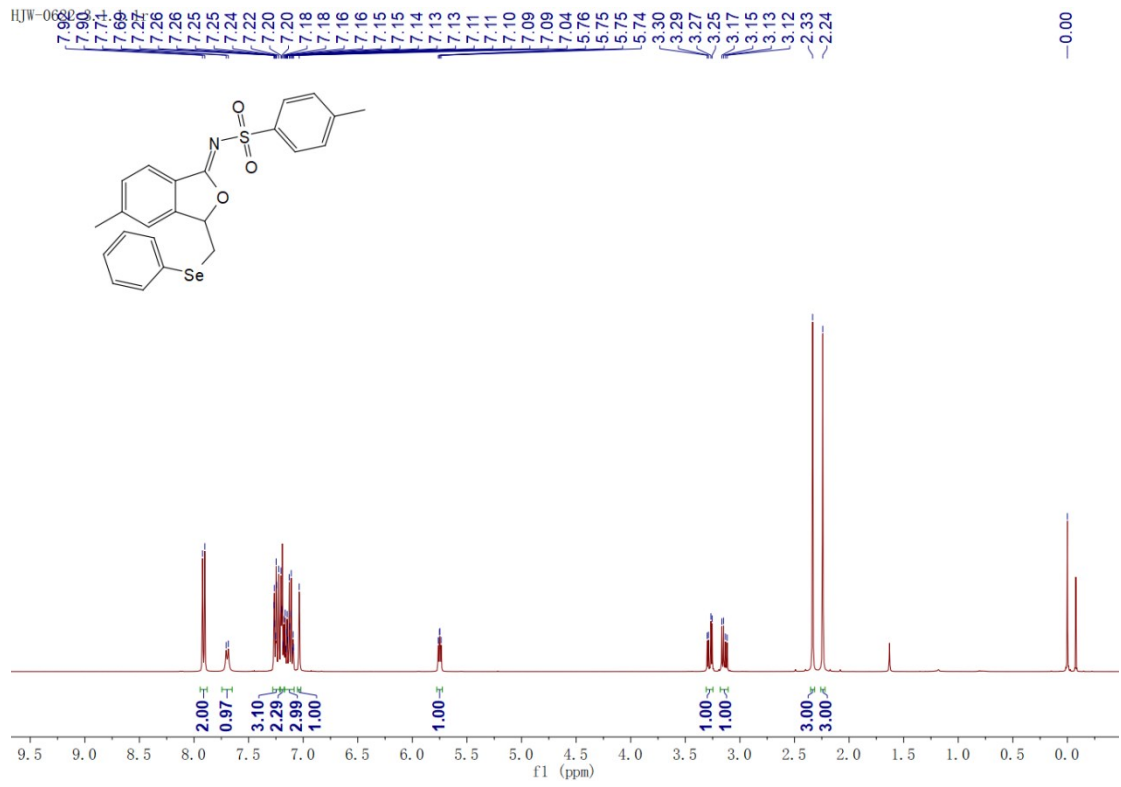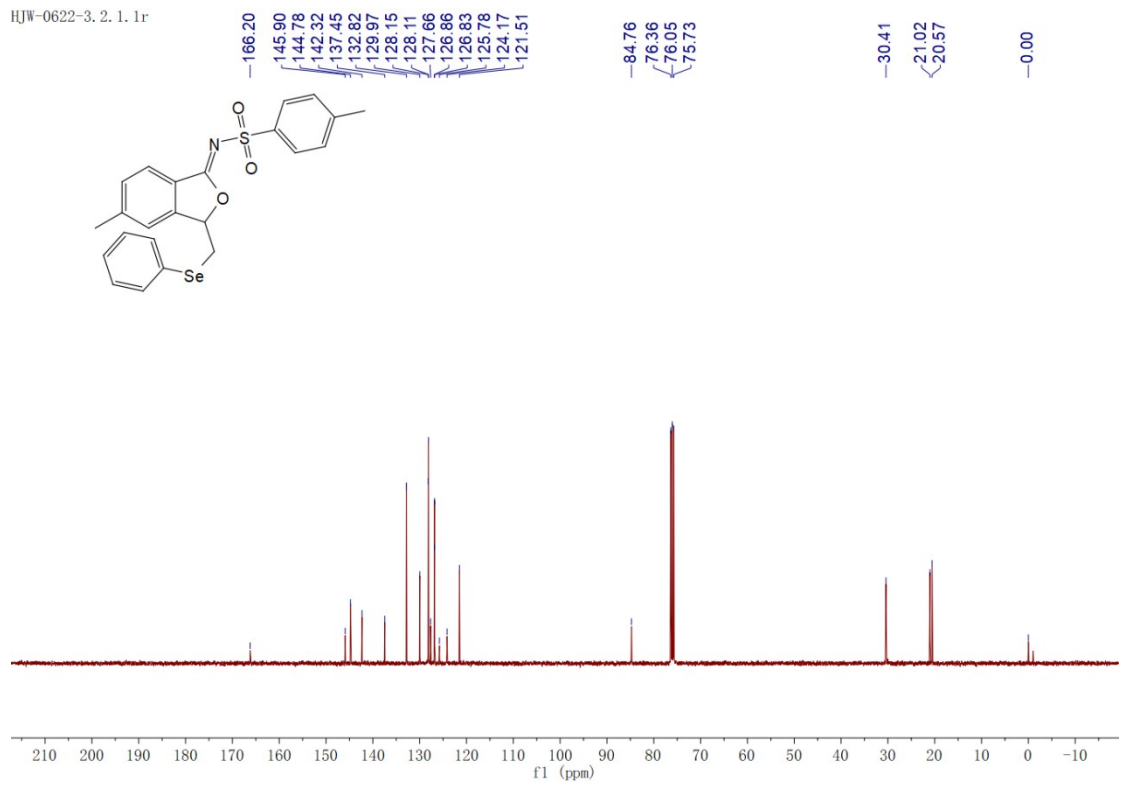

Product 3t

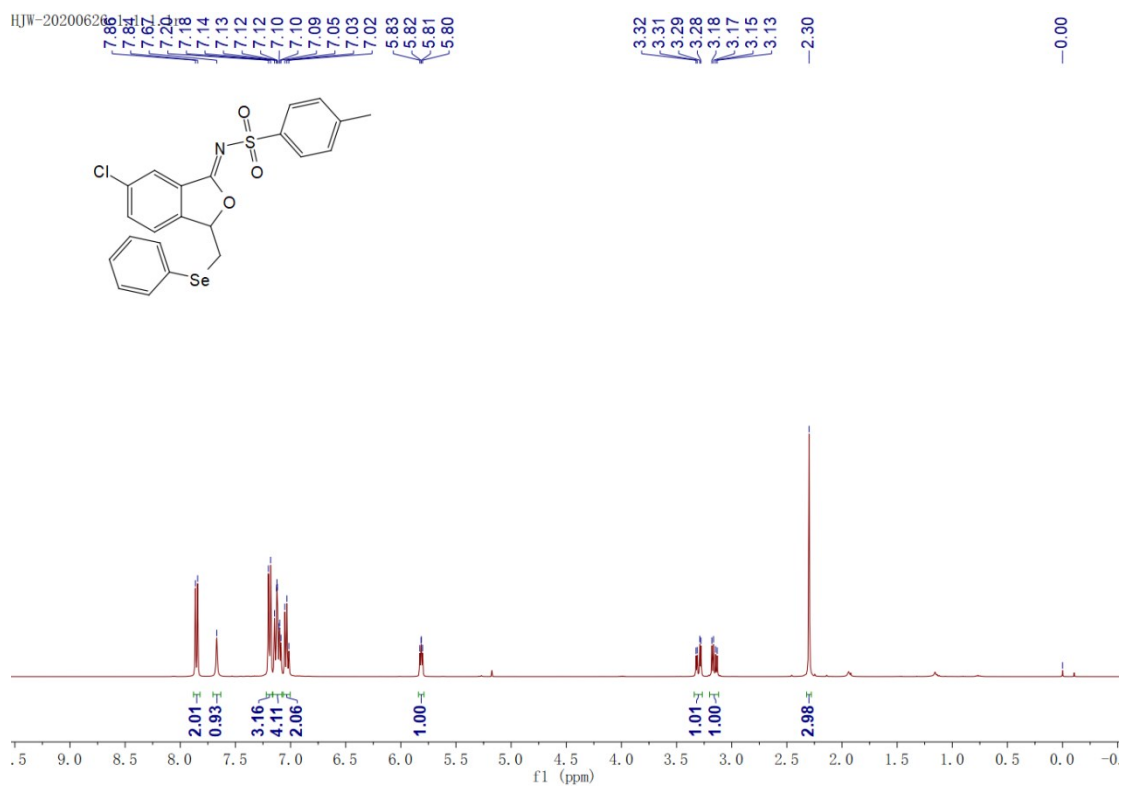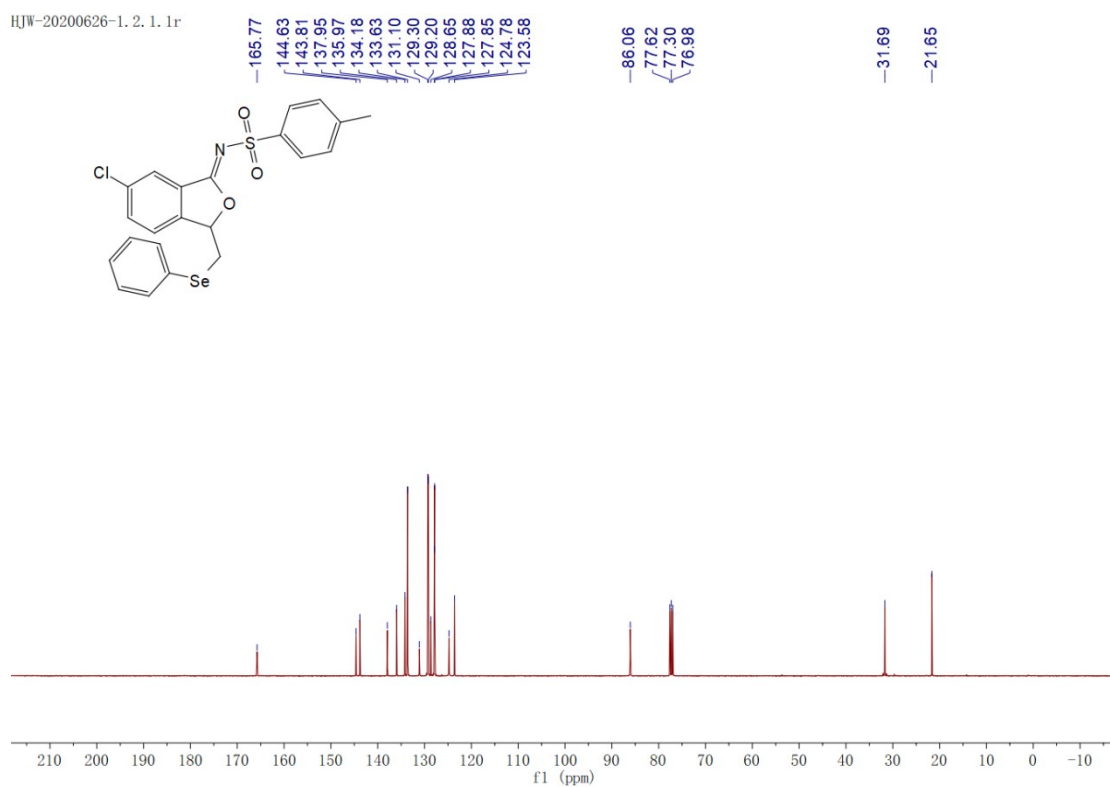

Product 3u

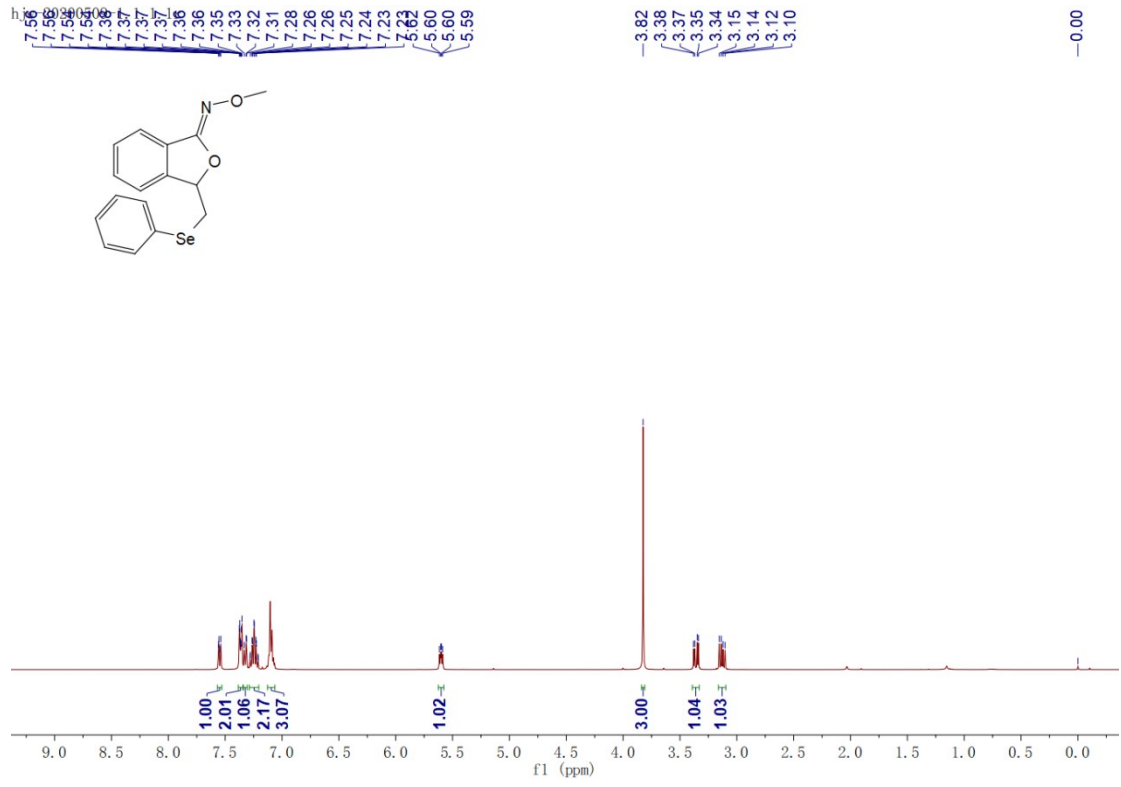

hjjw-20200509-1-2. 1. 1r

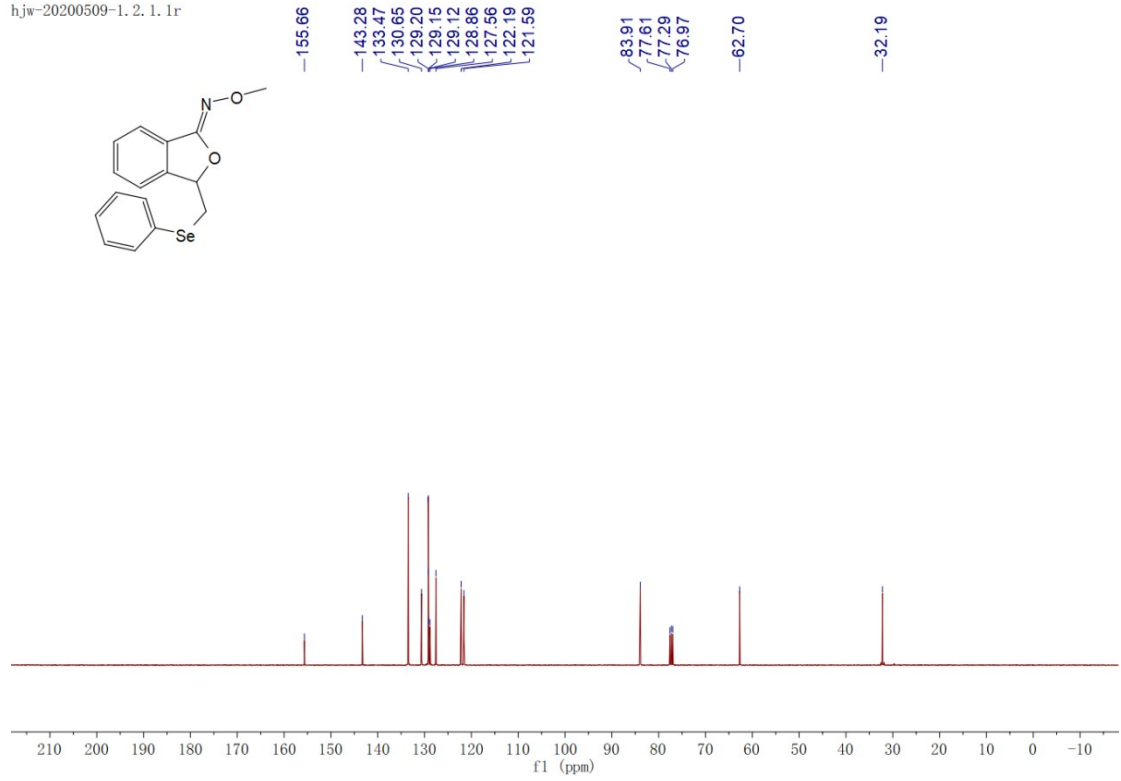

Product 3v

hjlw-20200526-2.2.1.1r

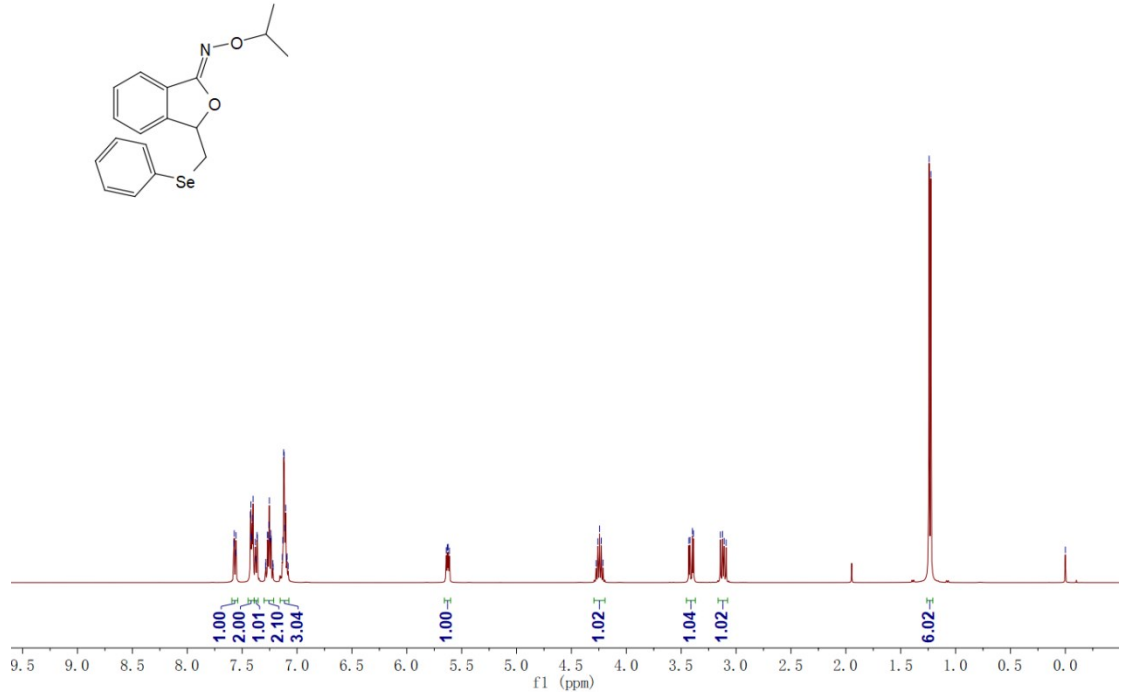

hjlw-20200526-2.2.1.1r

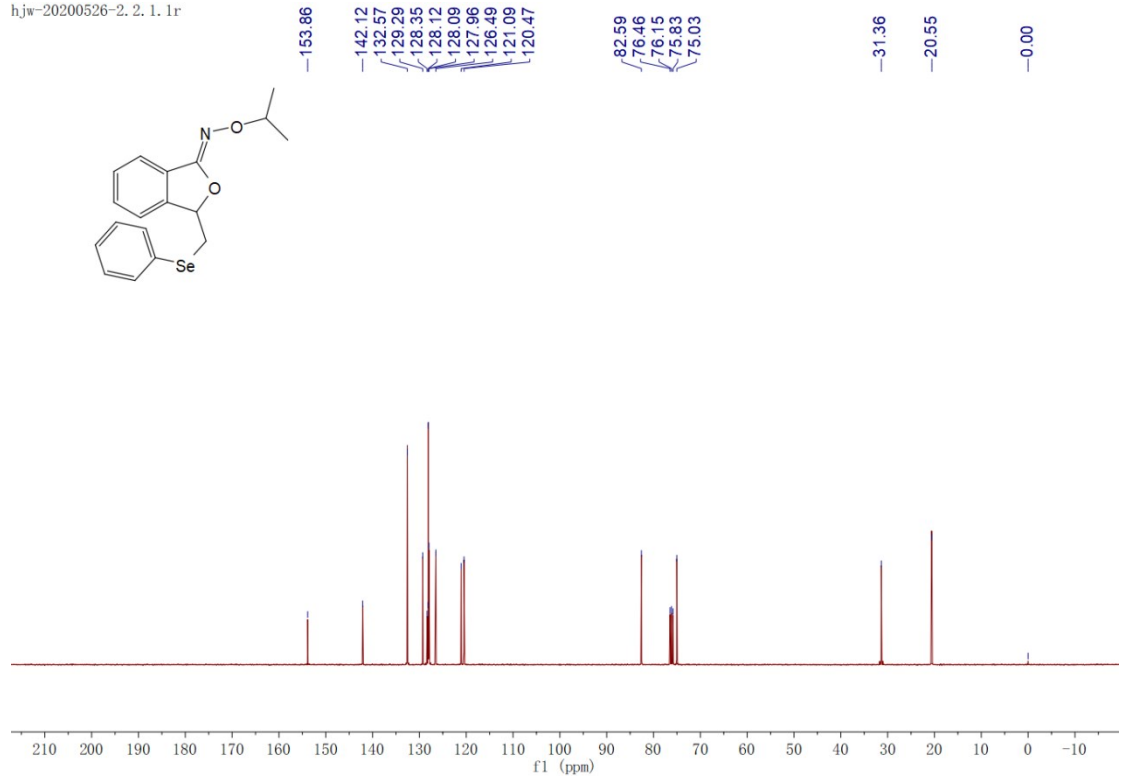

Product **3w**

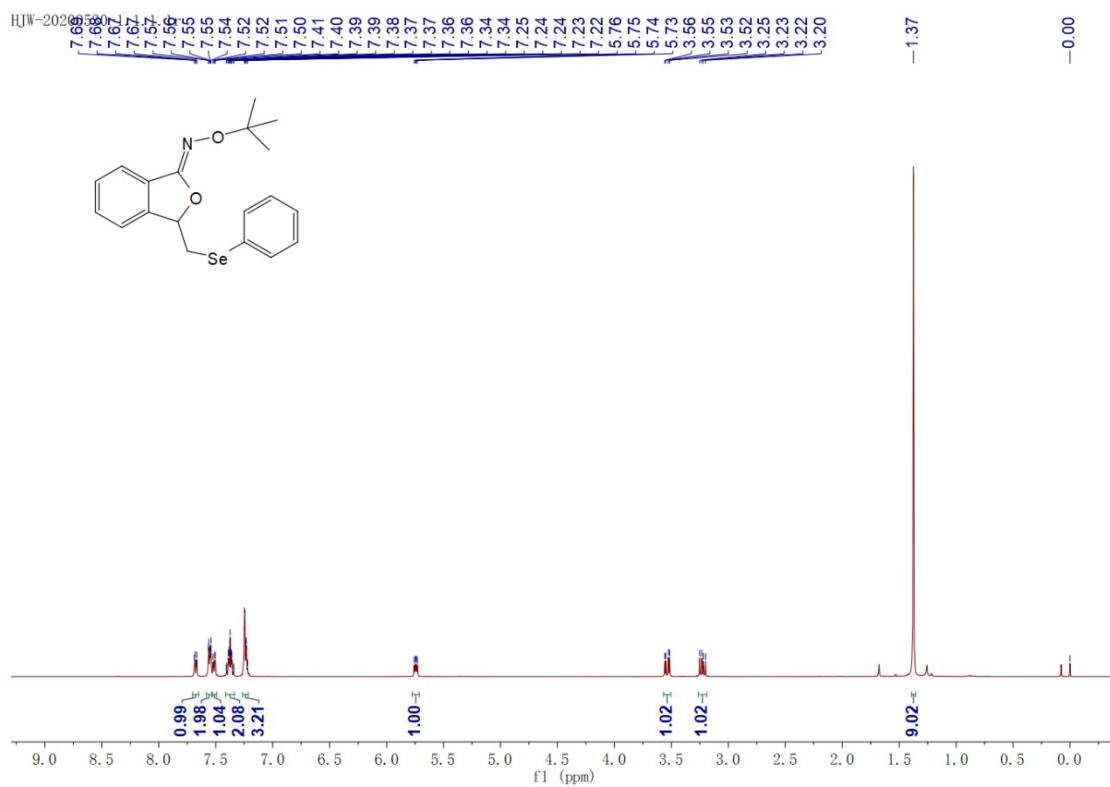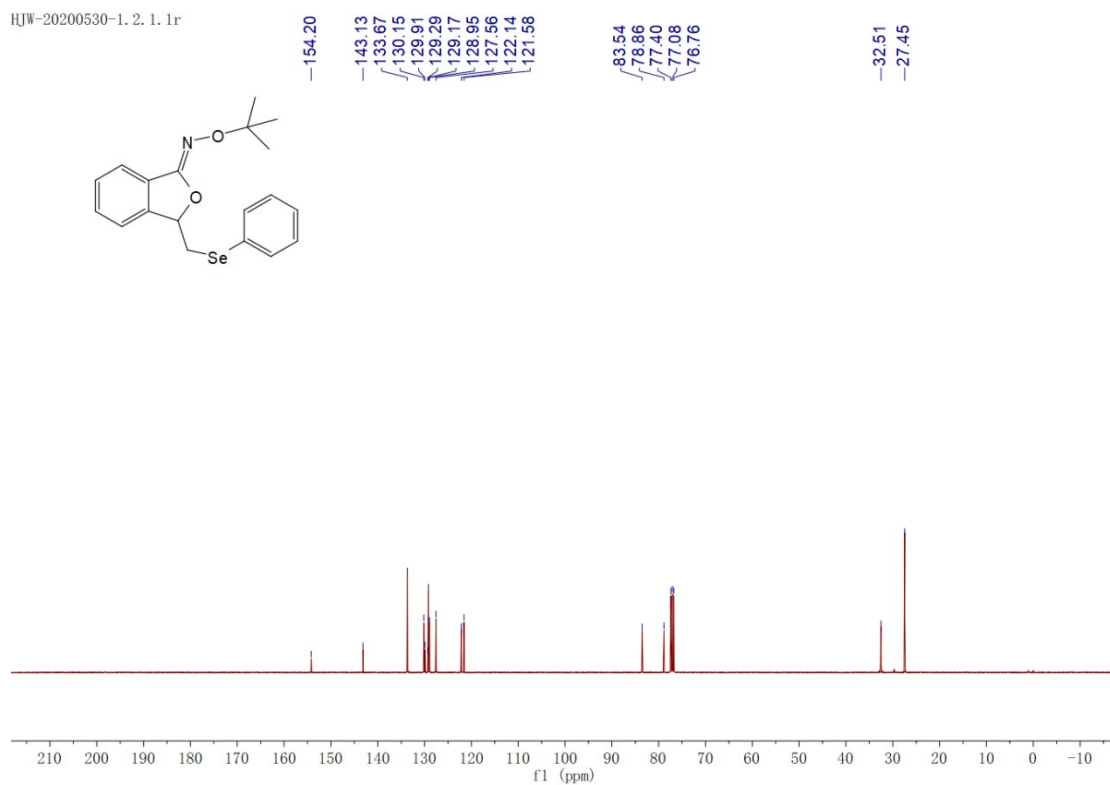

Product 3x

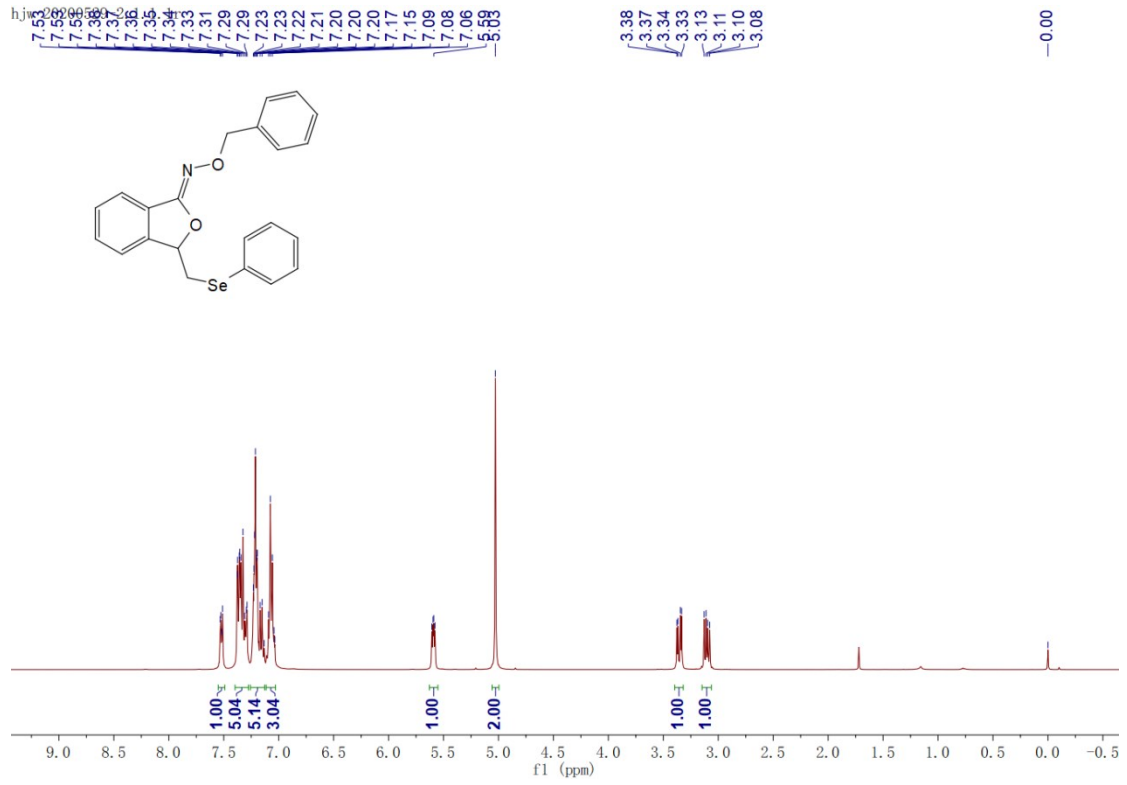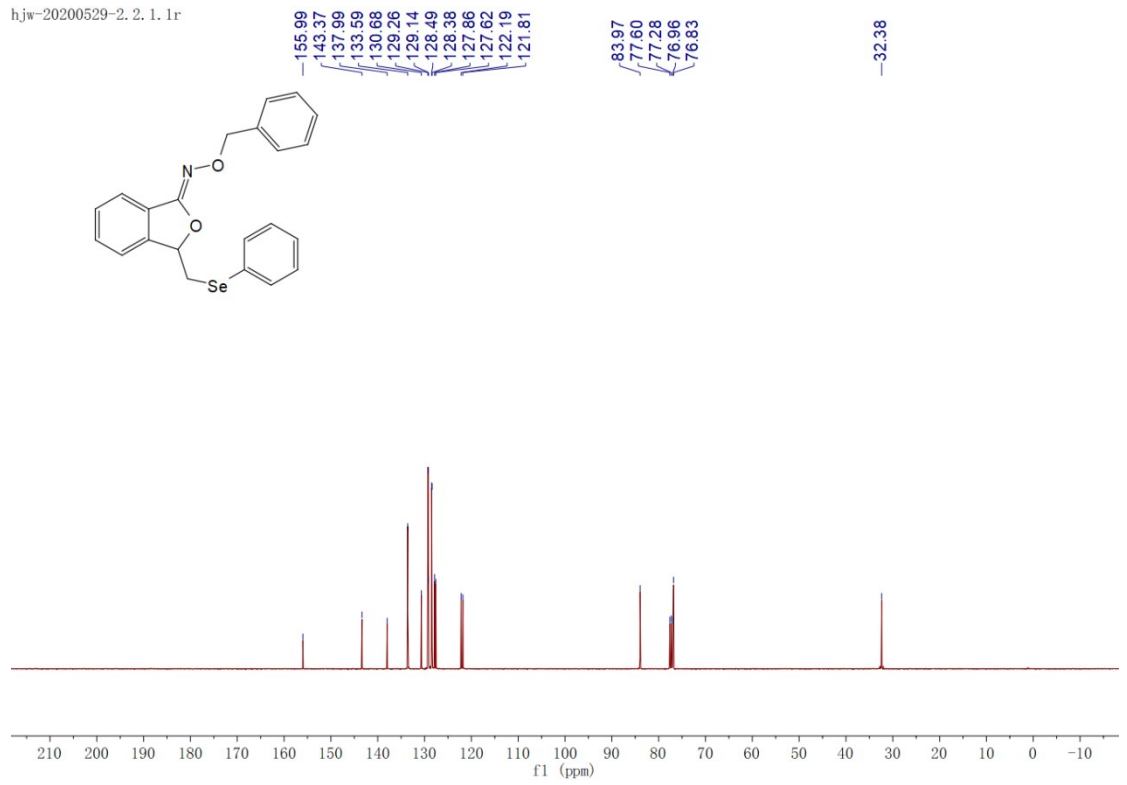

Product 3y

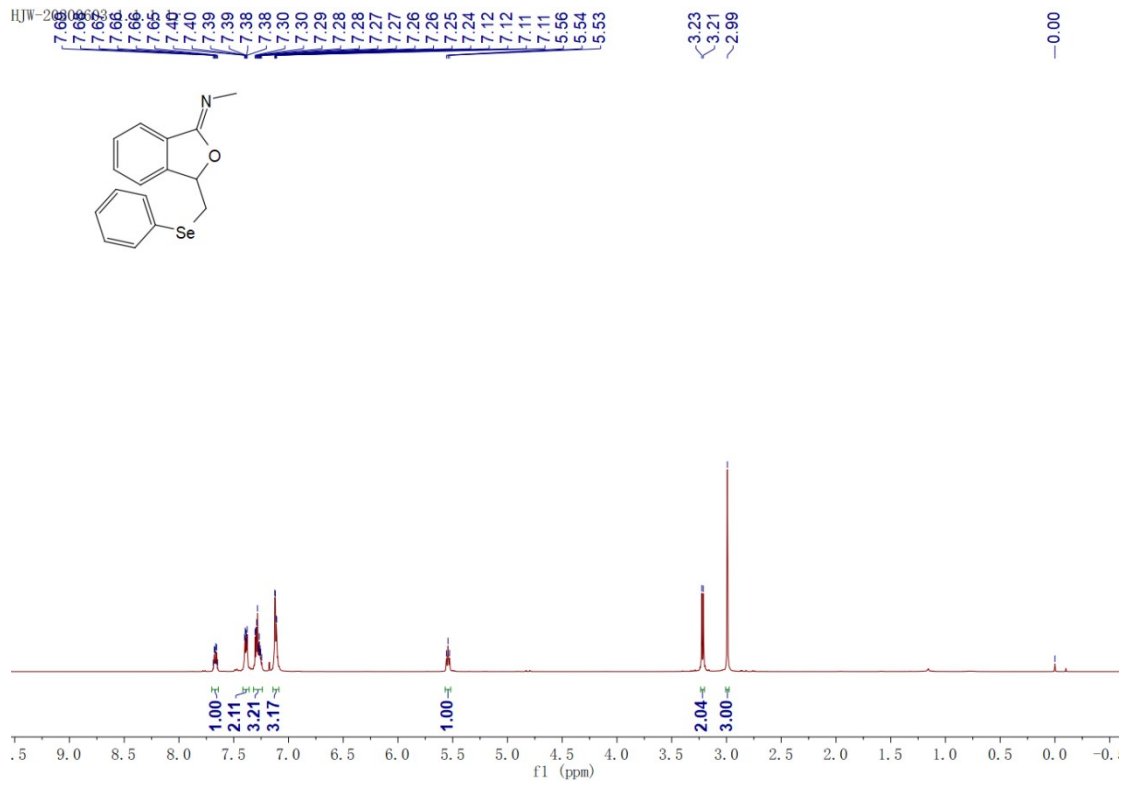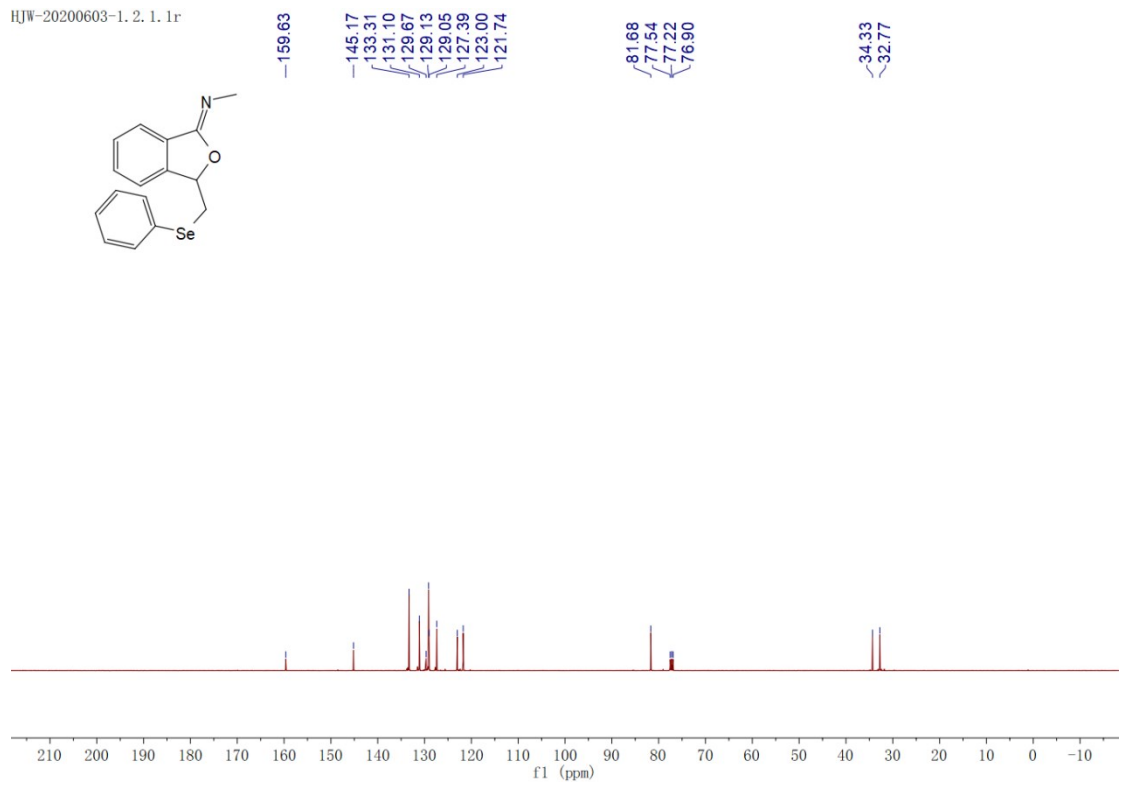

Product 3aa

hjlw-20200525-2

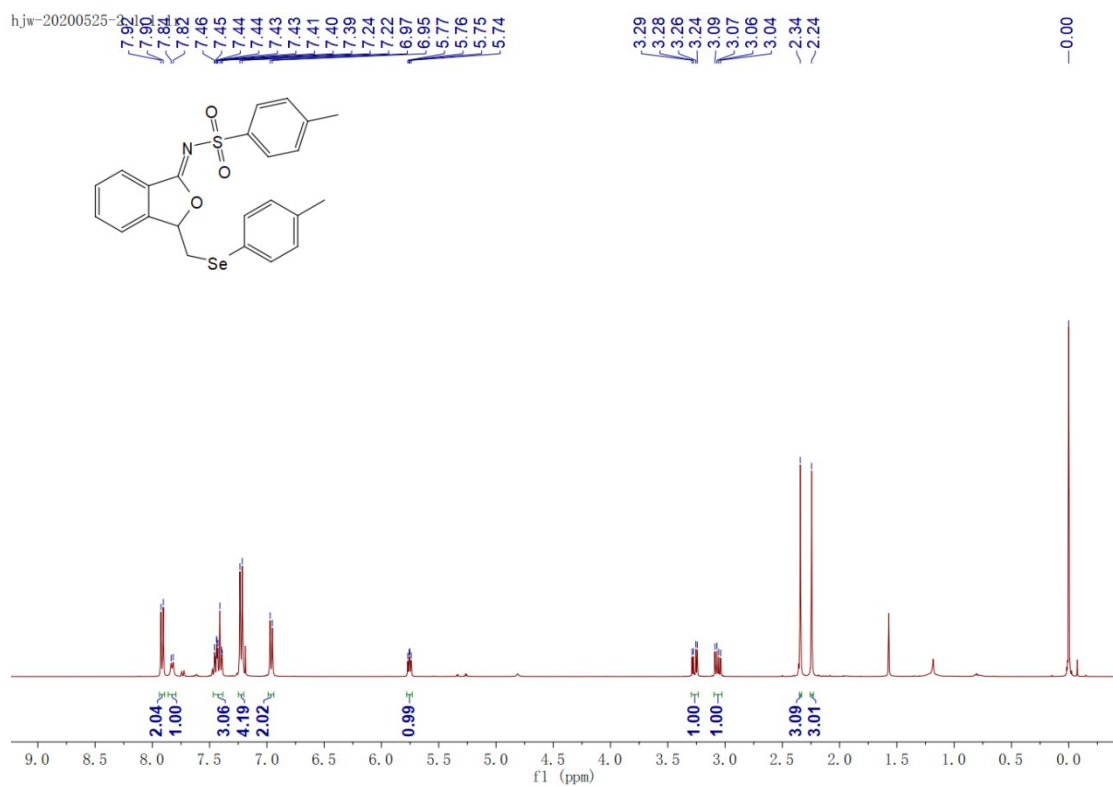

hjlw-20200525-2. 2. 1. 1r

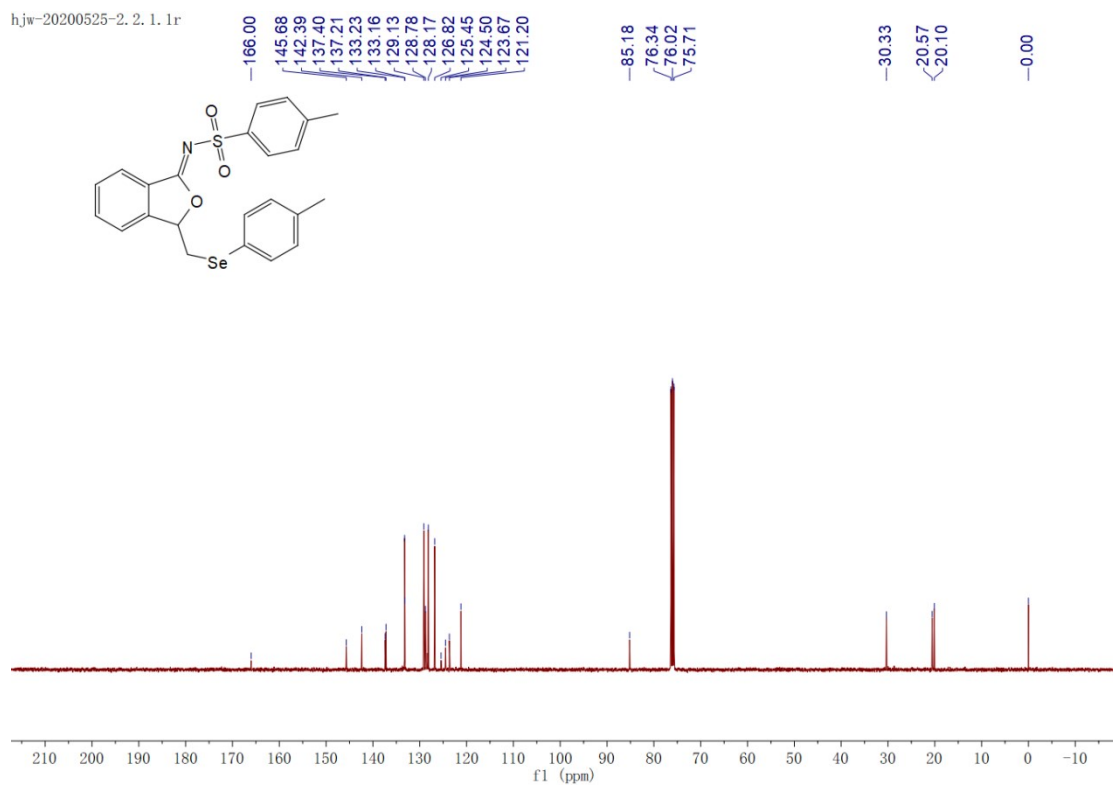



Product 3ab

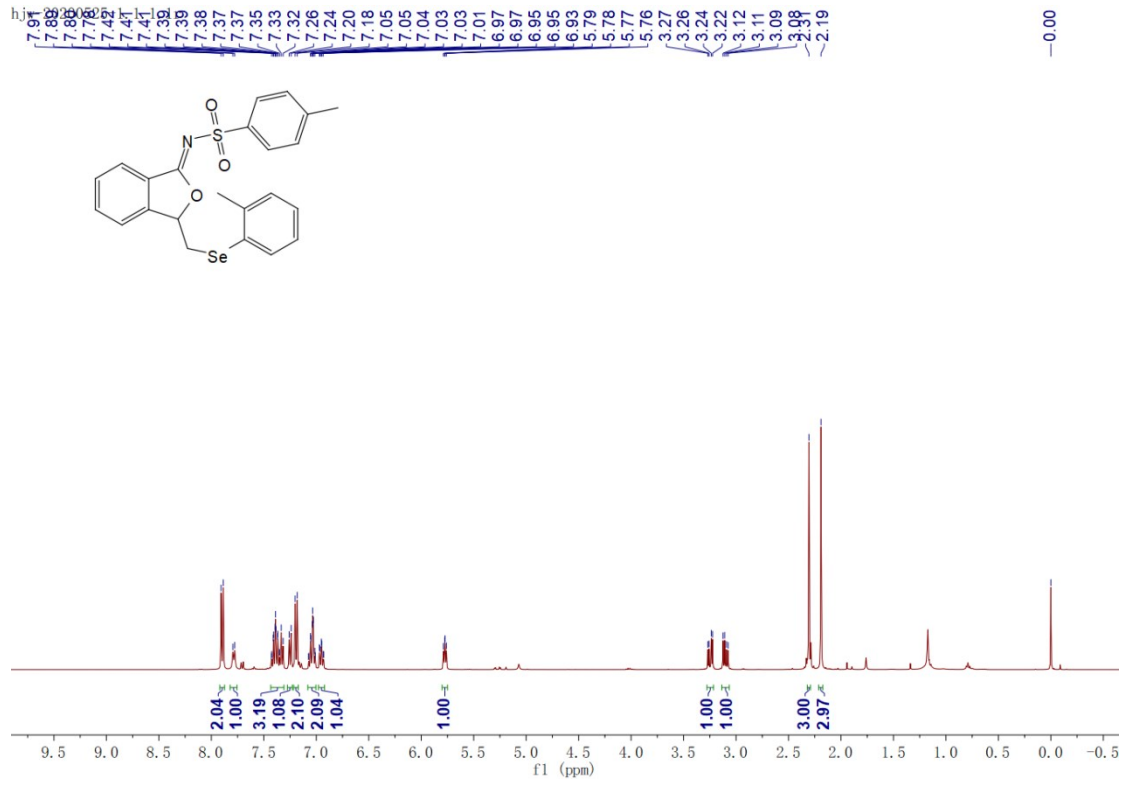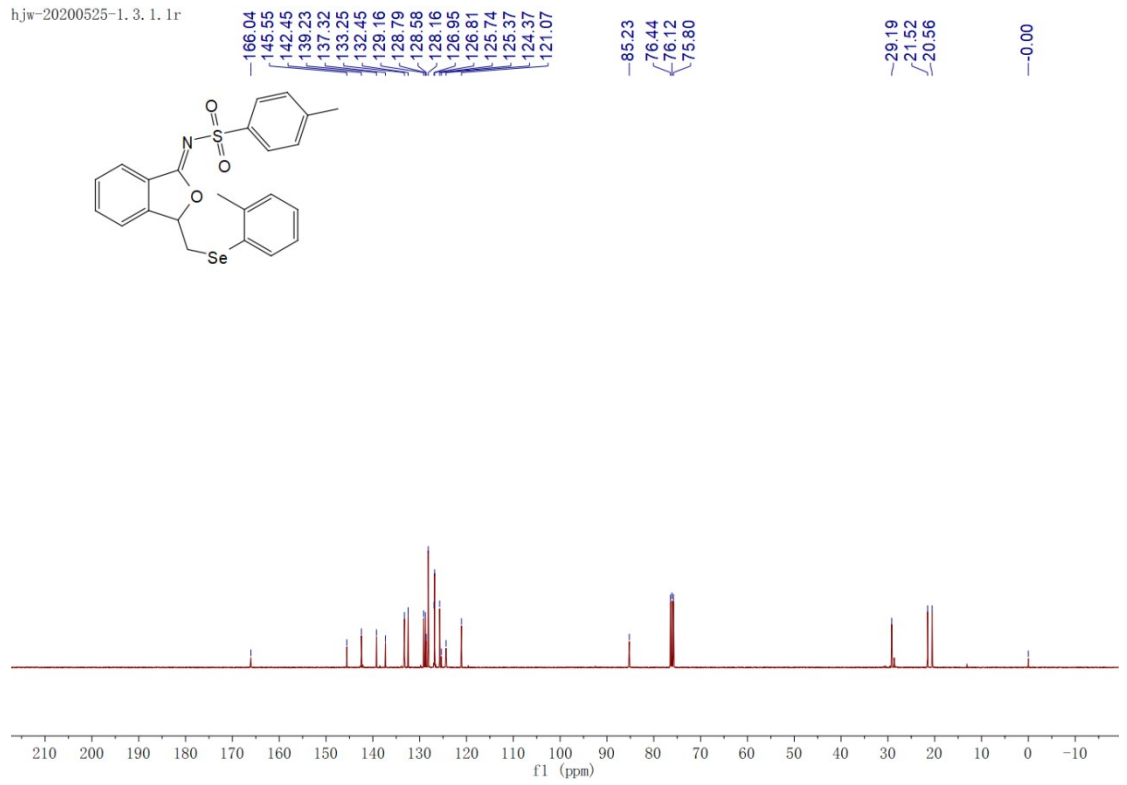

Product 3ac

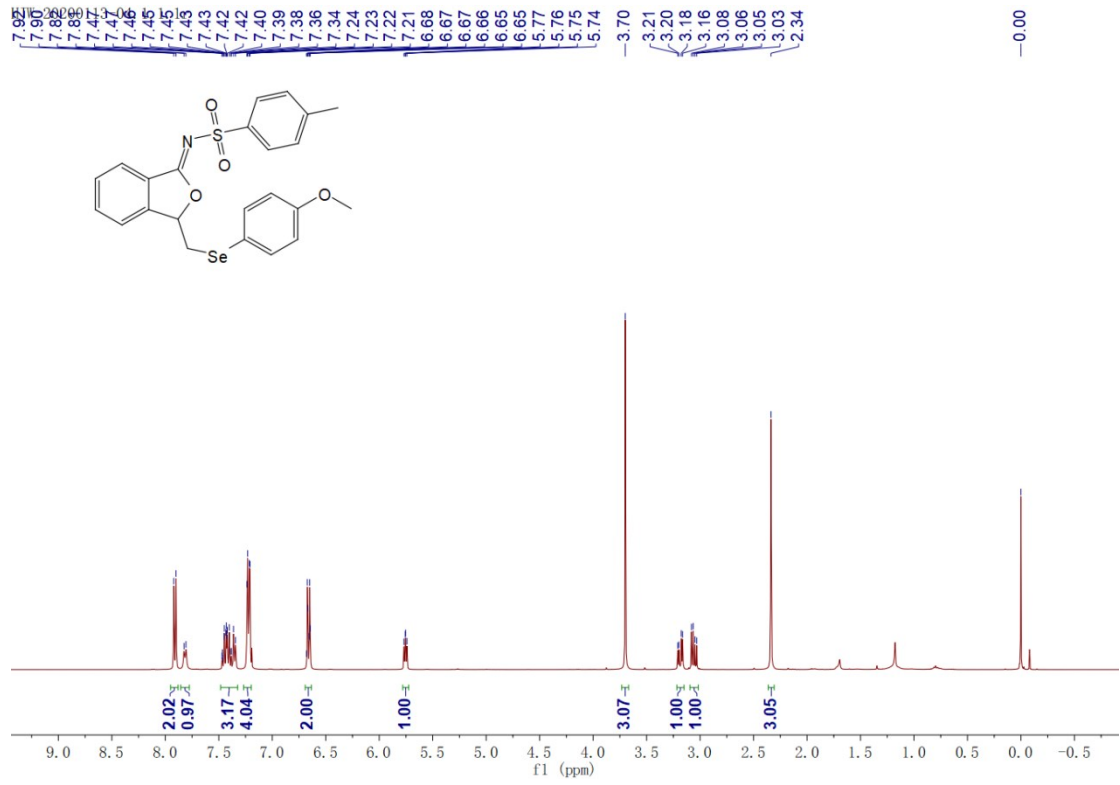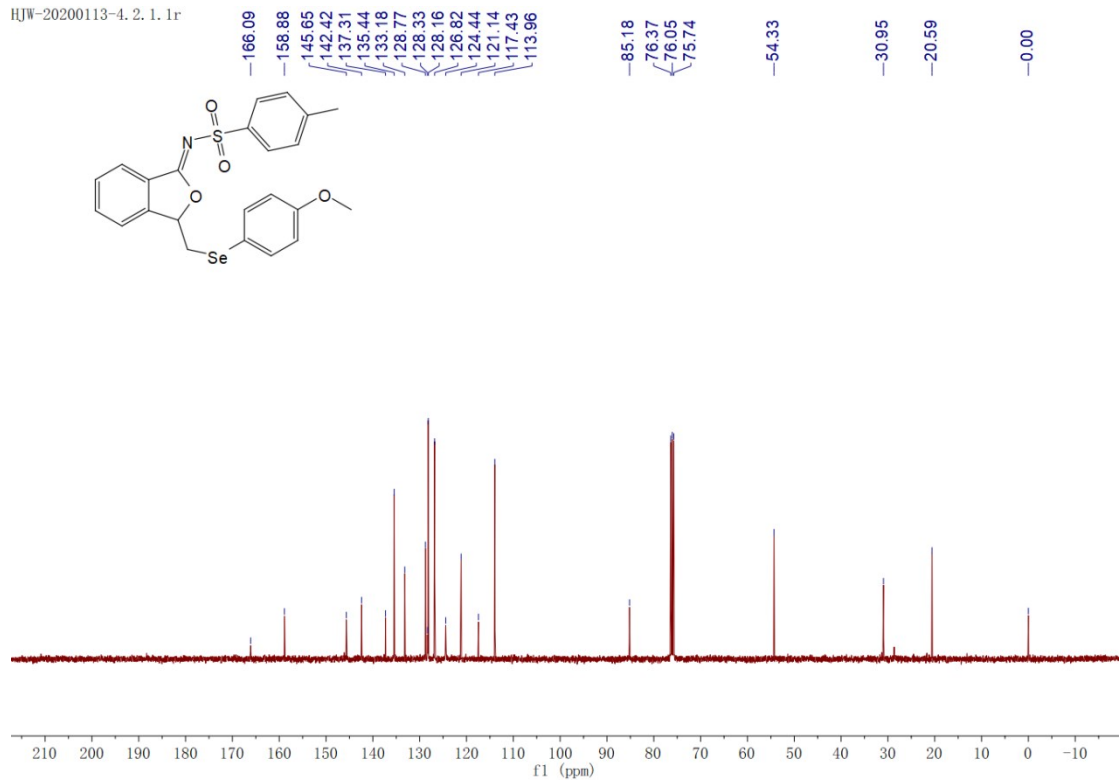

Product 3ad

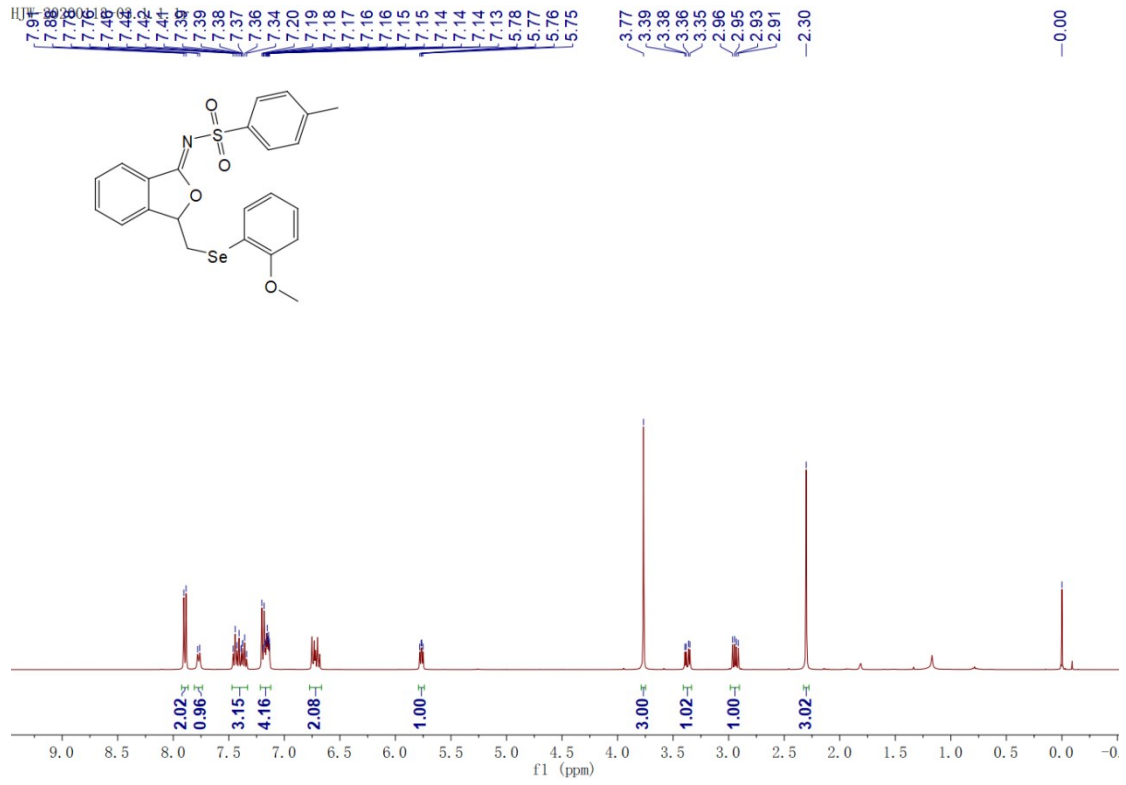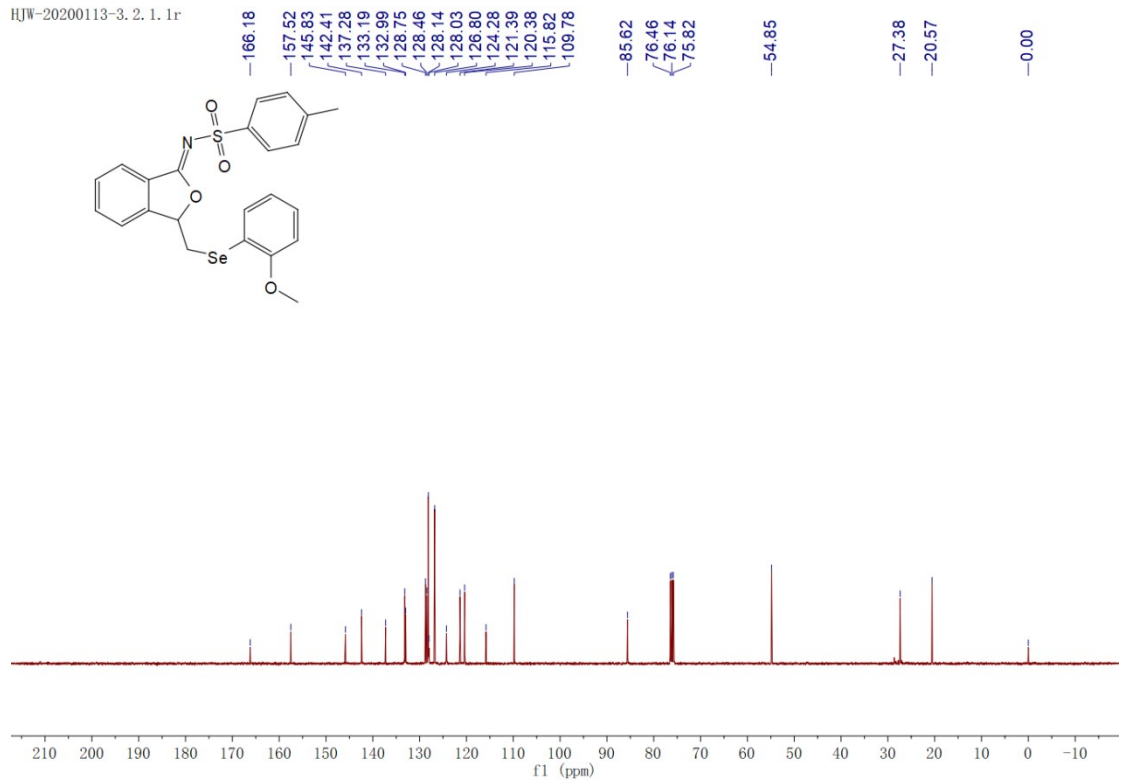

Product 3ae

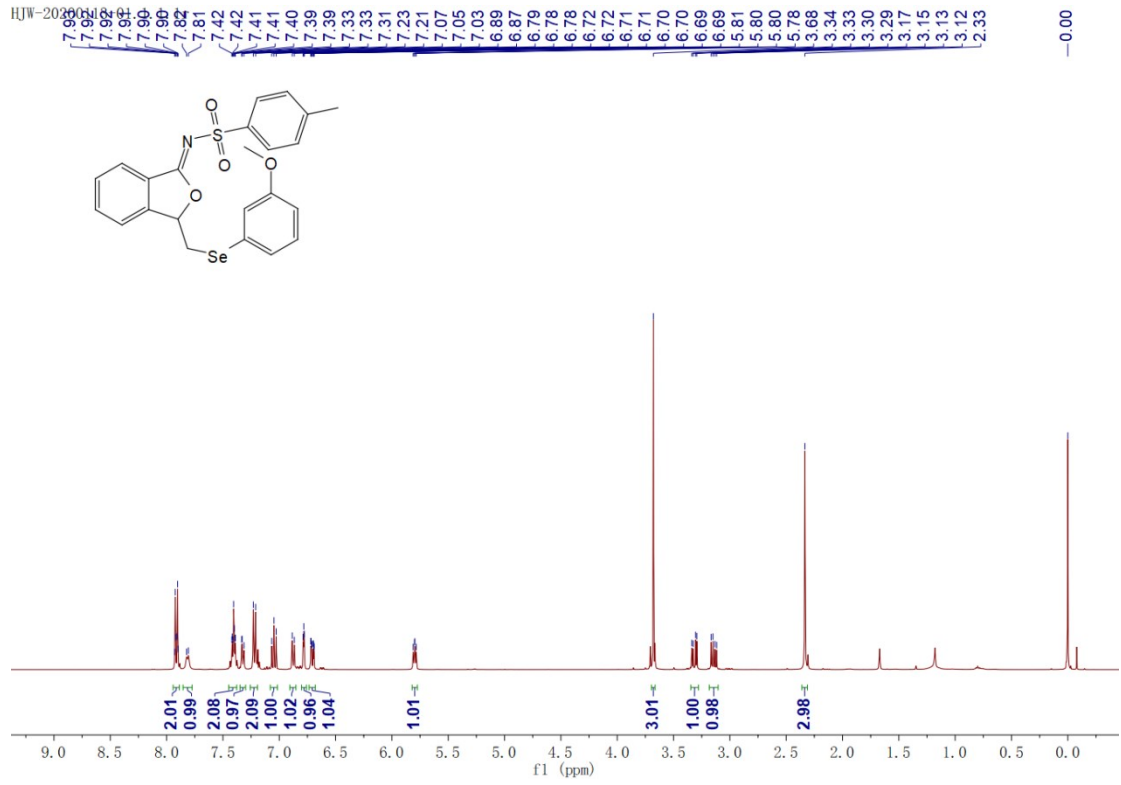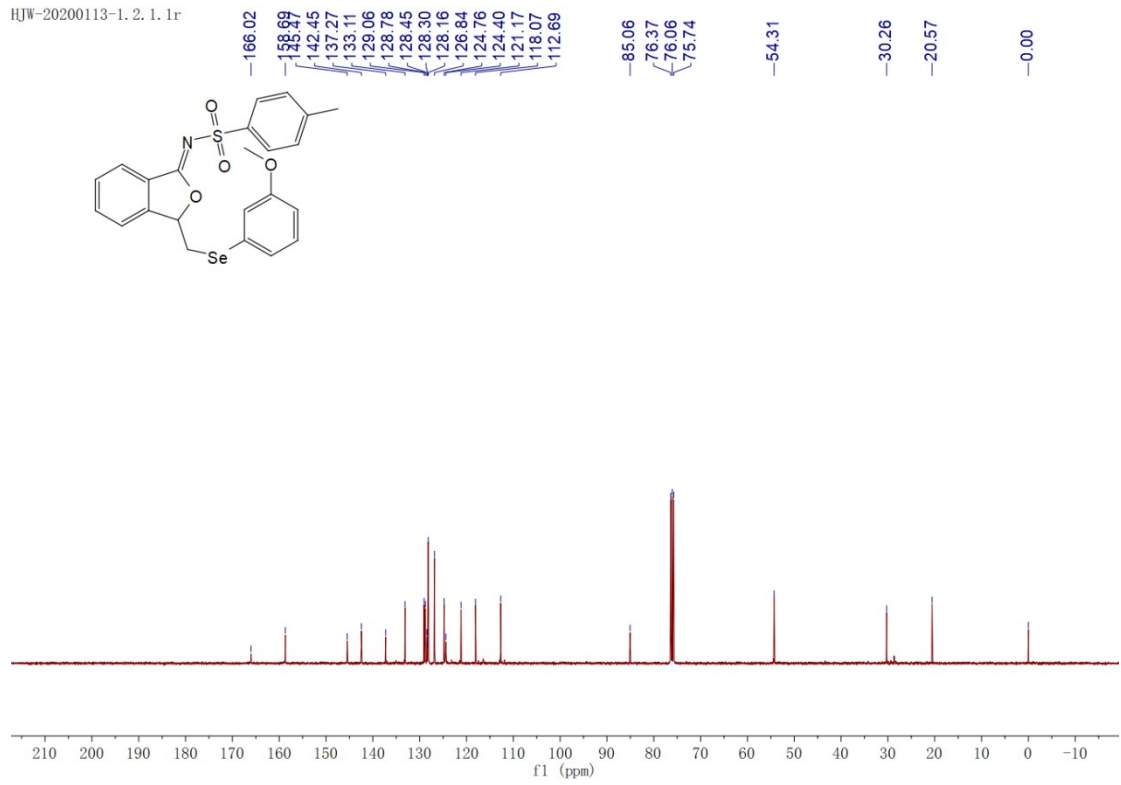

Product 3af

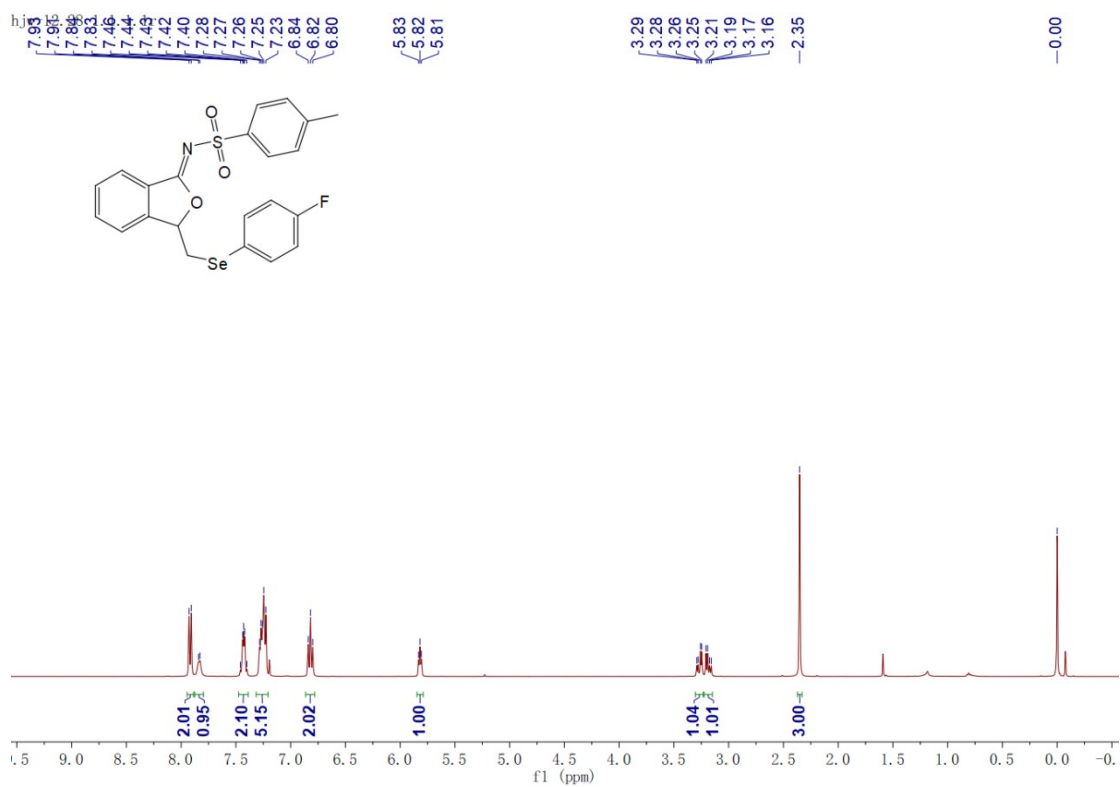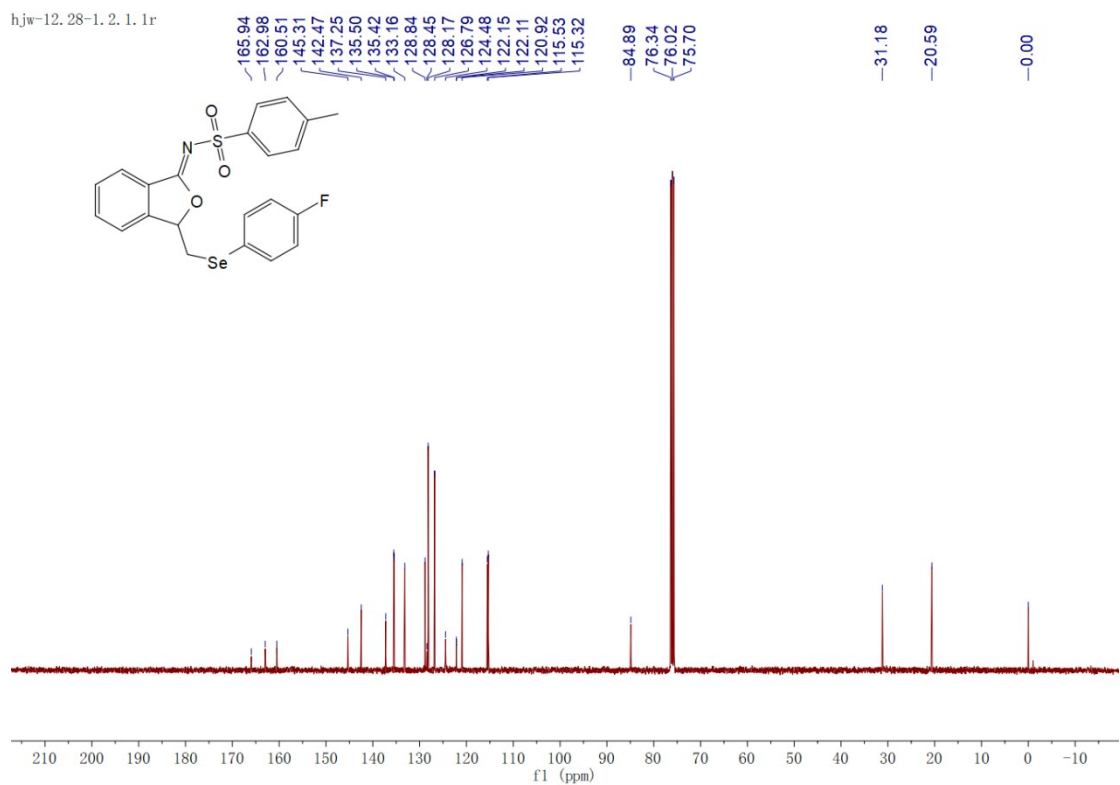

HJW-1228-1. 7. 1. 1r

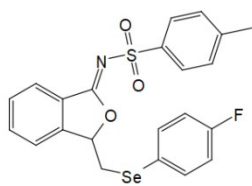

--112.95

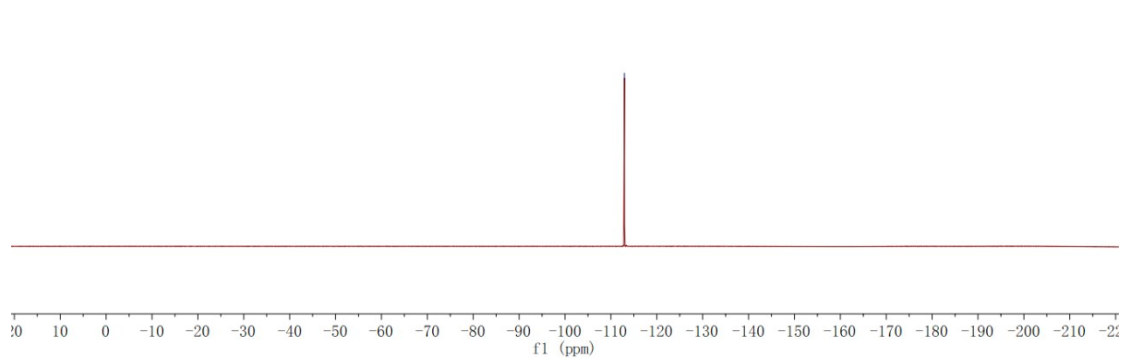

Product 3ag

hjlw-12.17-1.1.1r

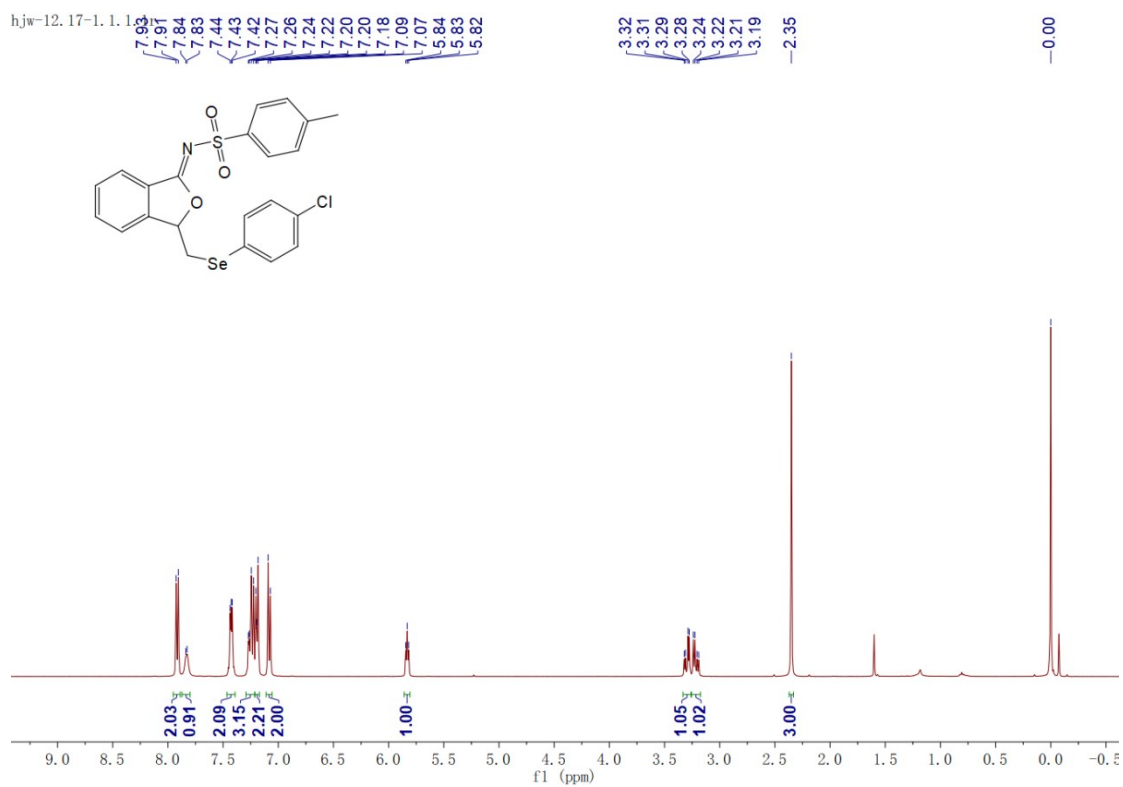

HJW-1217-1--. 2. 1. 1r

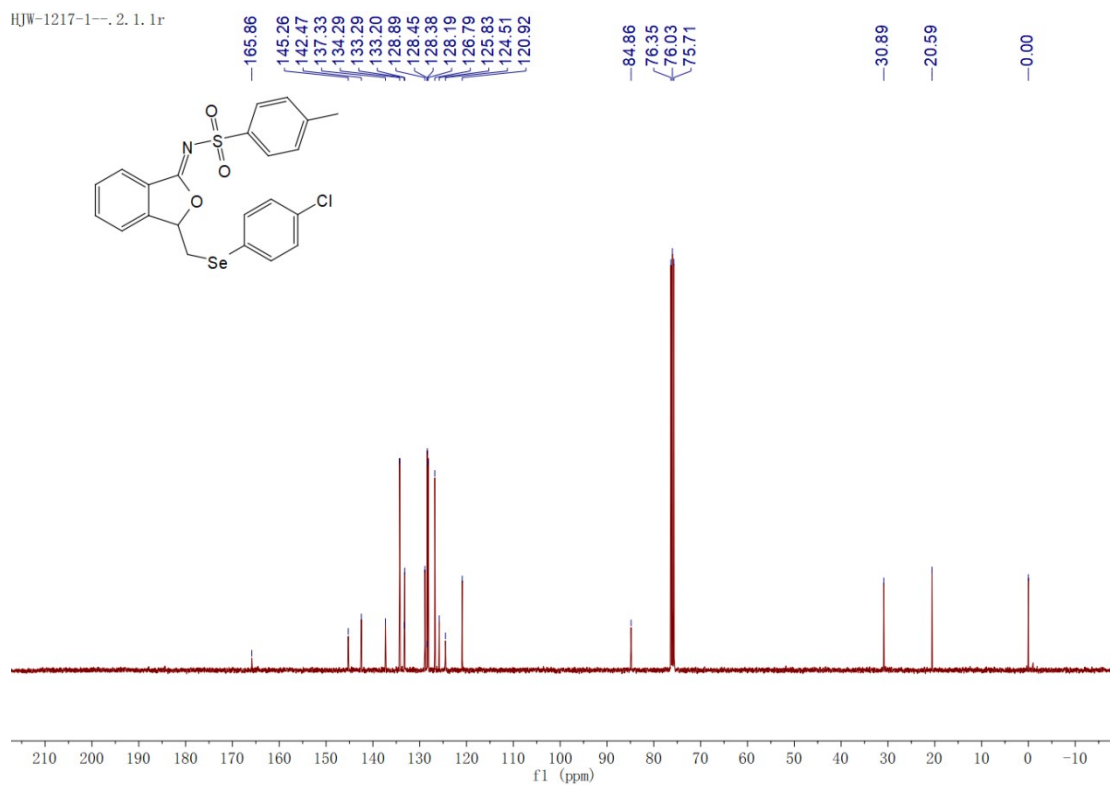

### Product 3ah

HJW-20200108-01. 1. 1.

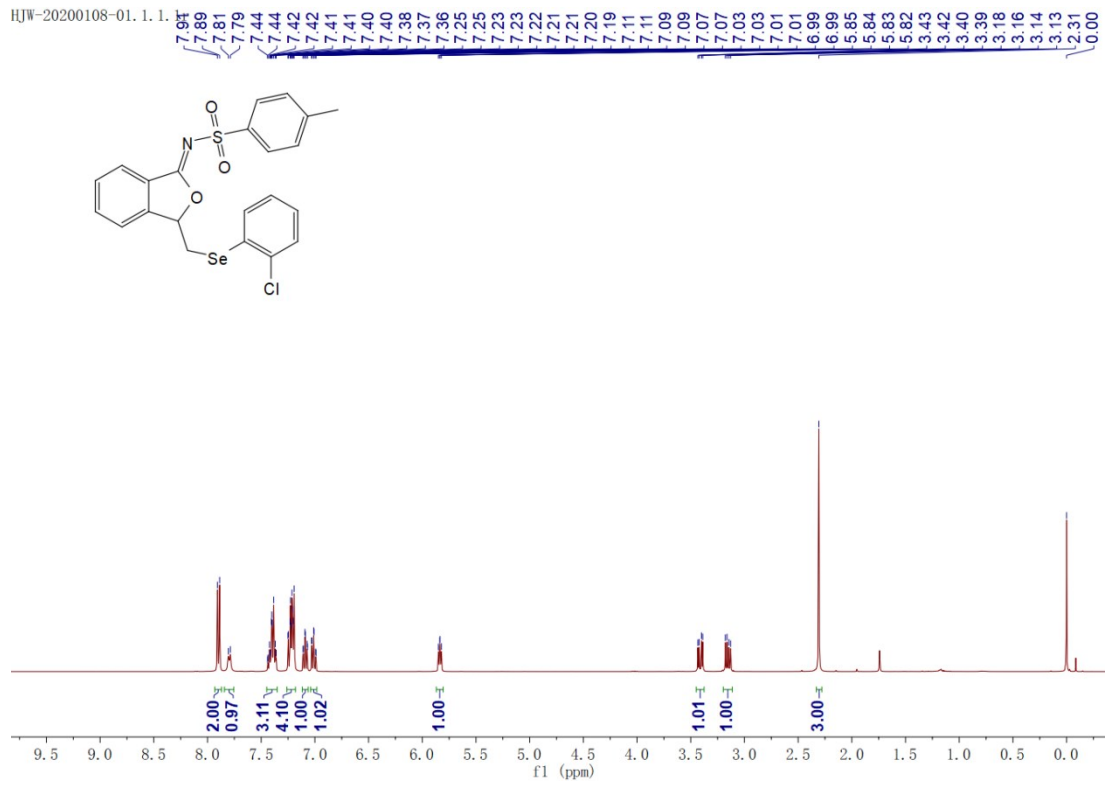

HJW-20200108-1. 2. 1. 1r

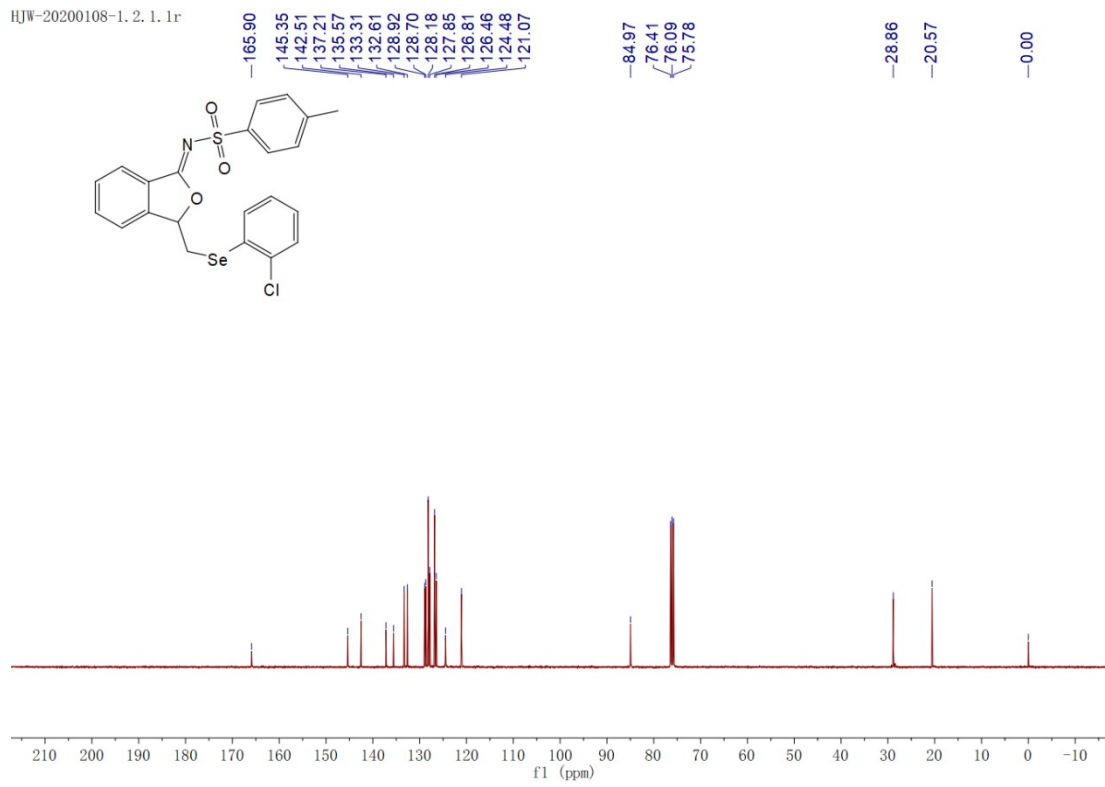



# Product 3ai

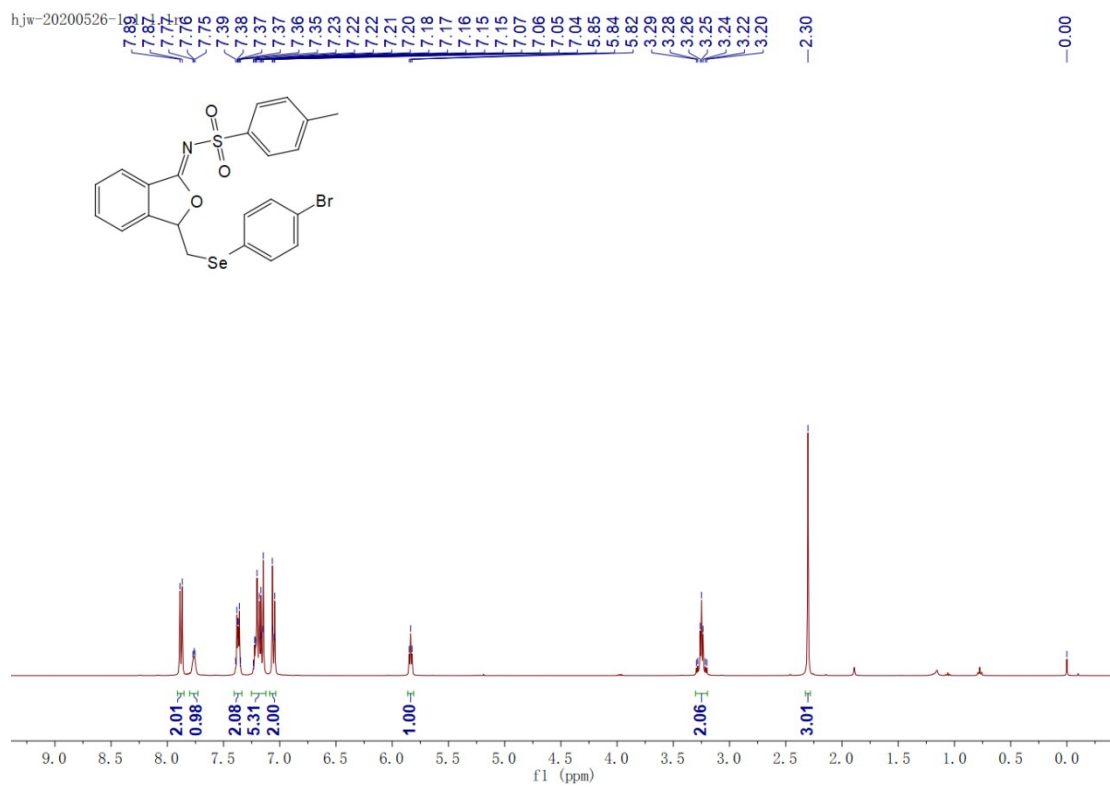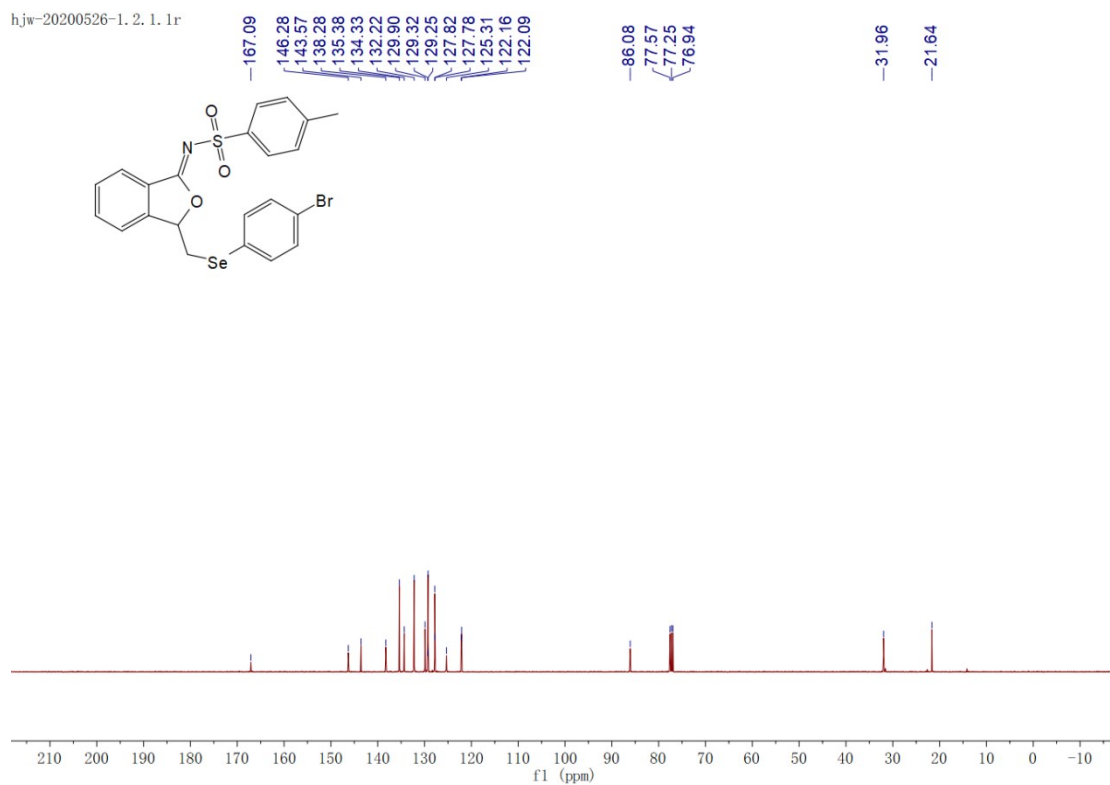

Product 3aj

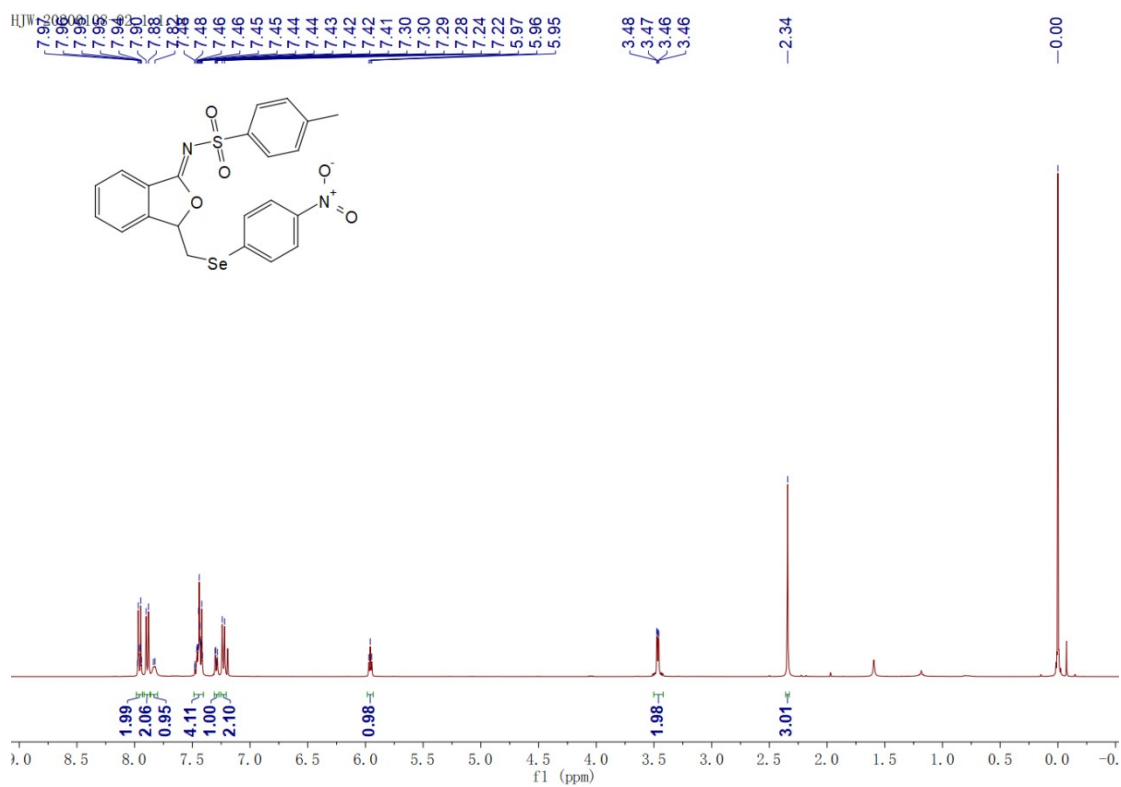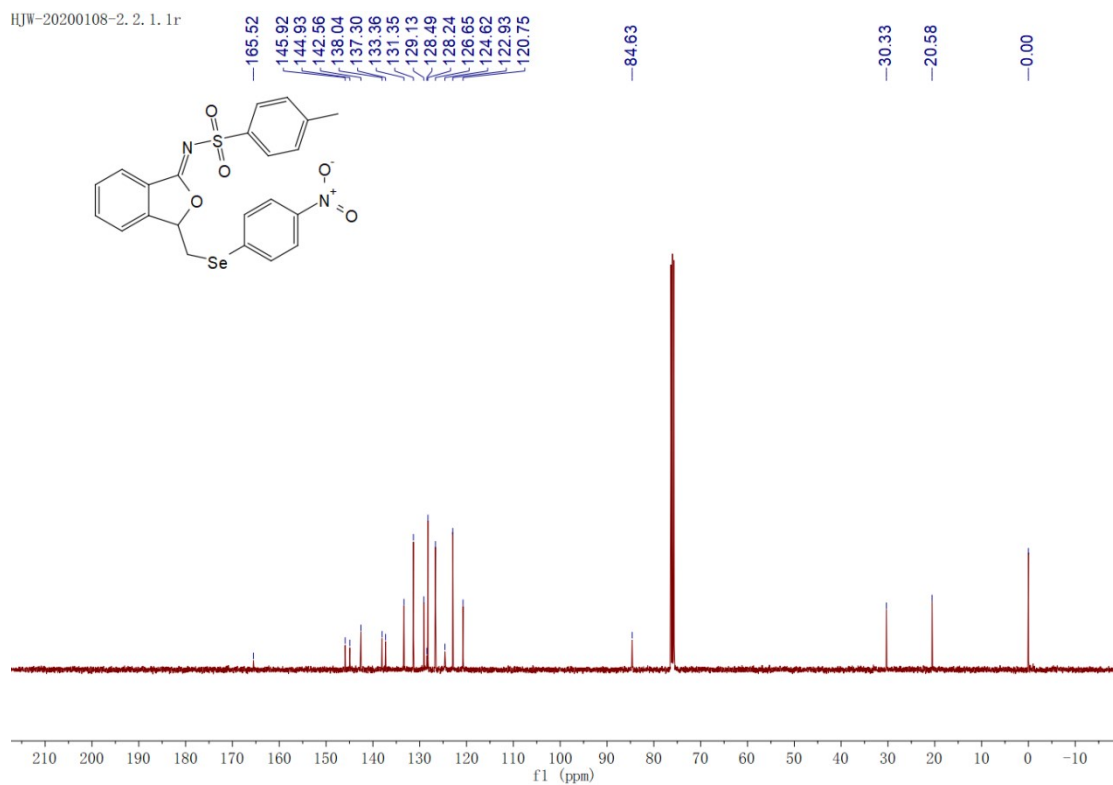

Product 3ak

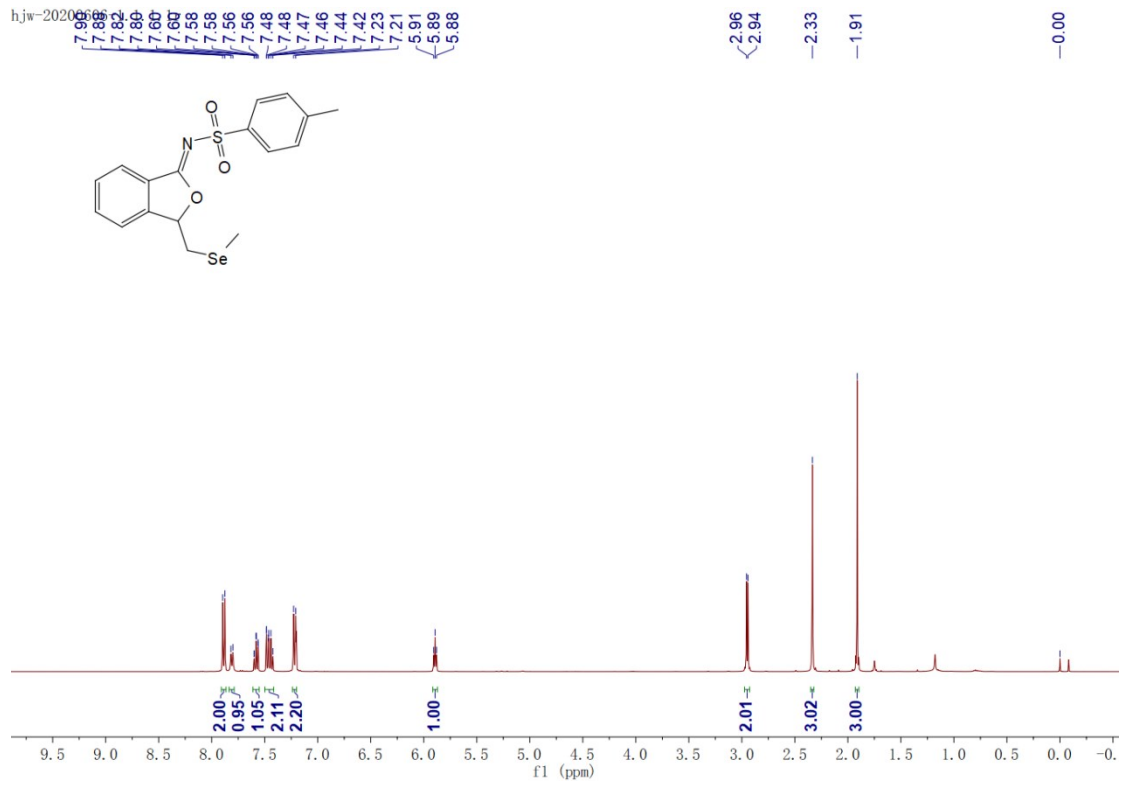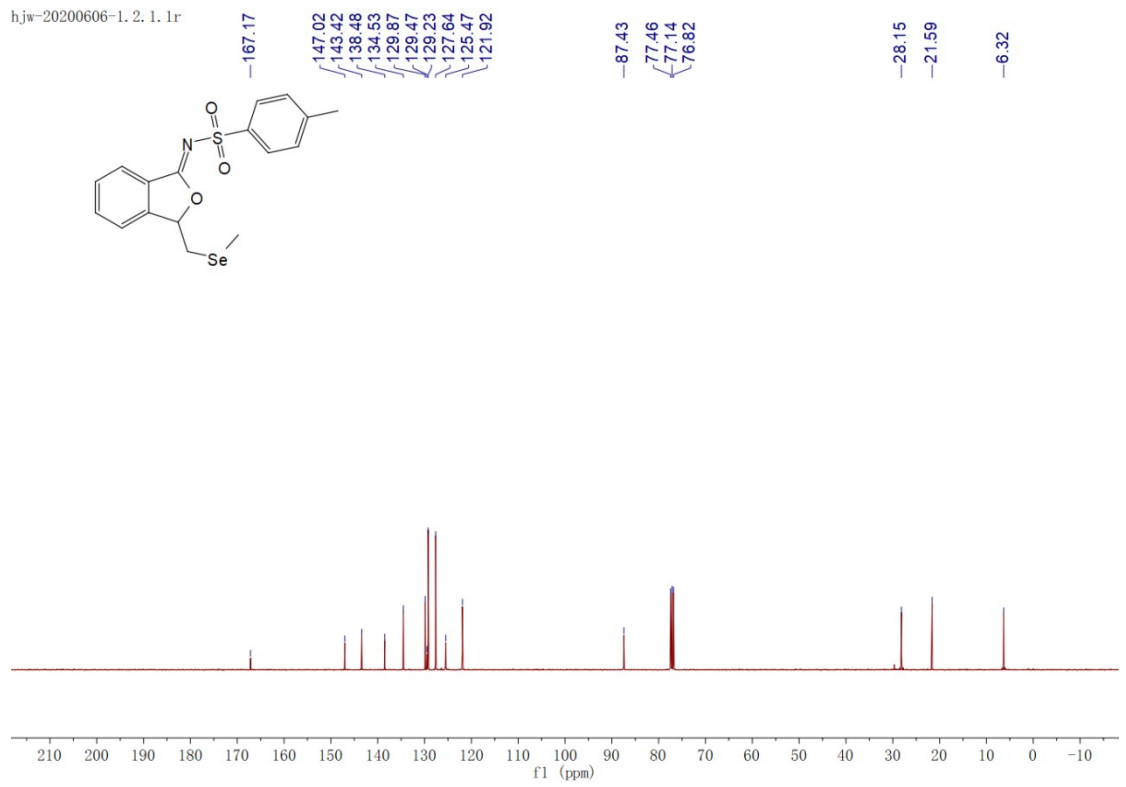

Product 3aI

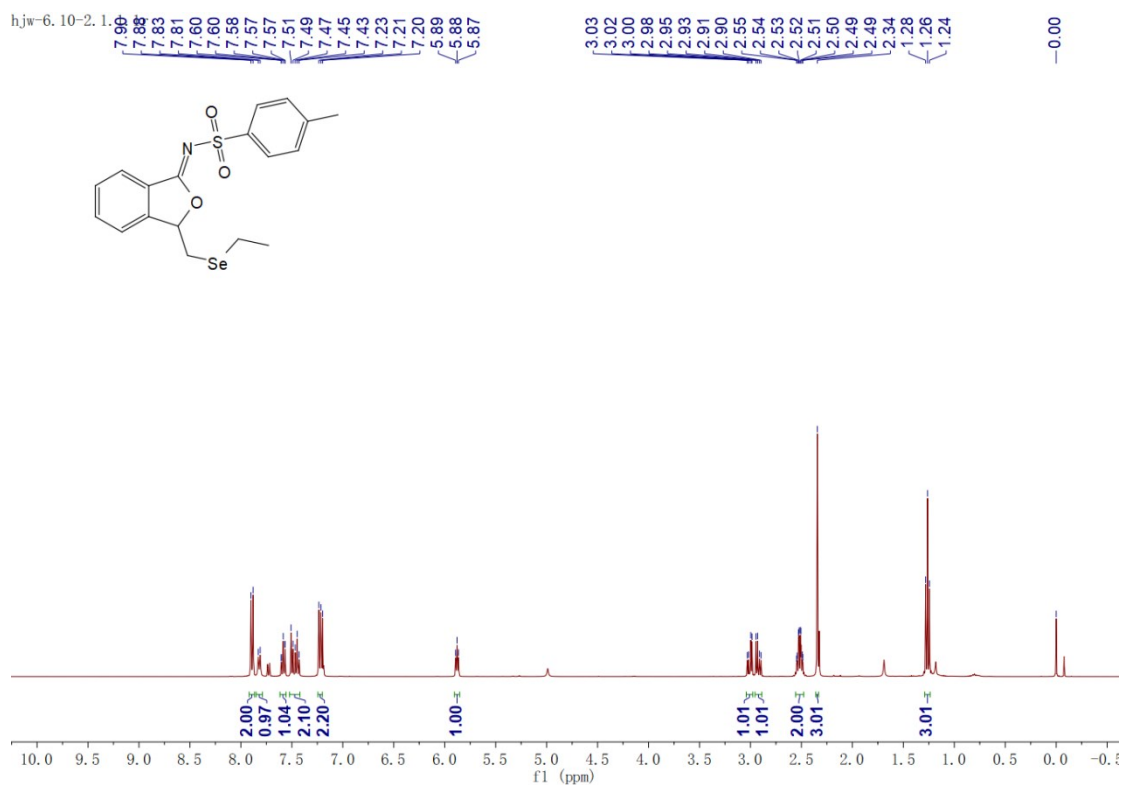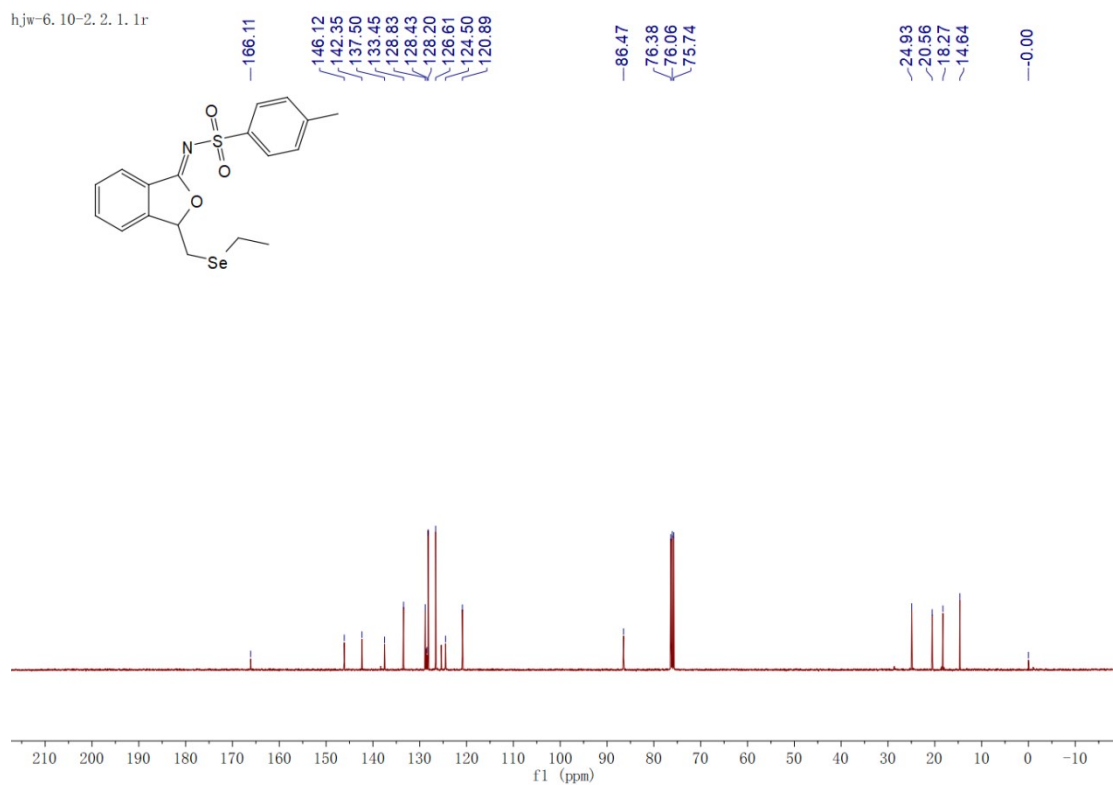

Product 4a

hjlw-yiyinduocao  
 7.96, 7.92, 7.89, 7.87, 7.79, 7.77, 7.70, 7.34, 7.33, 7.32, 7.32, 7.31, 7.30, 7.30, 7.28, 7.28, 7.28, 7.27, 7.26, 7.24, 7.22, 7.22, 7.15, 7.15, 7.14, 7.13, 7.13, 7.12, 7.11, 7.10, 7.09, 7.09, 7.06, 7.04, 7.04, 7.03, 7.02, 7.02, 5.45, 5.44, 5.43, 3.75, 3.72, 3.71, 3.66, 3.64, 3.62, 3.61, 2.33, 0.00

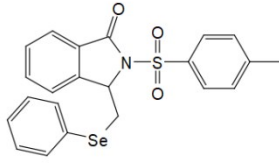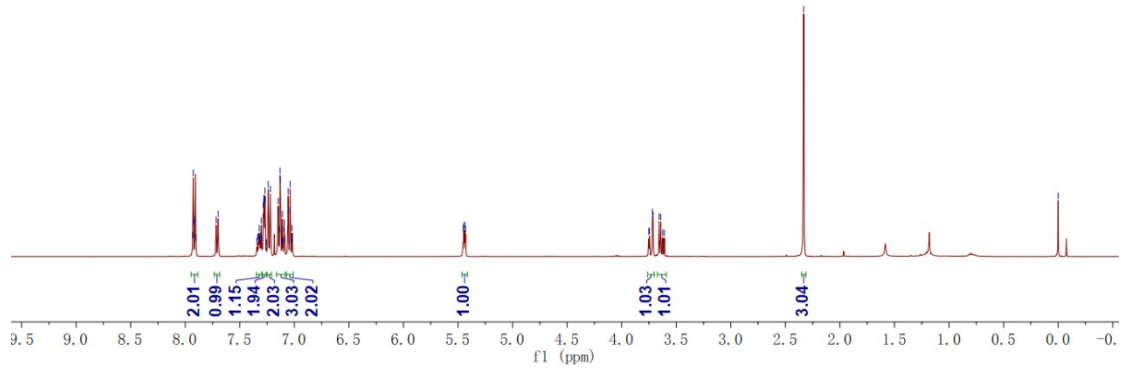

hjlw-yiyinduotong-shang. 2. 1. 1r

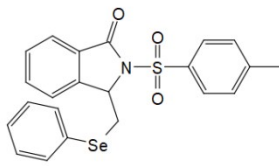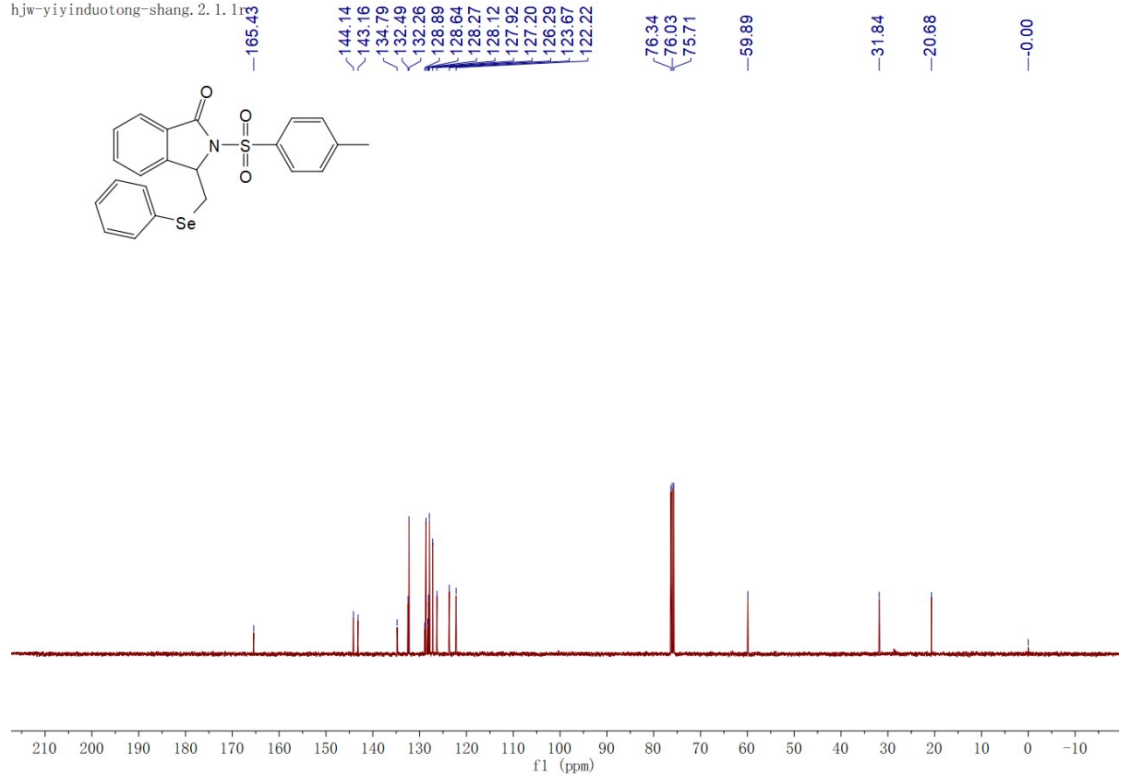

Product 4b

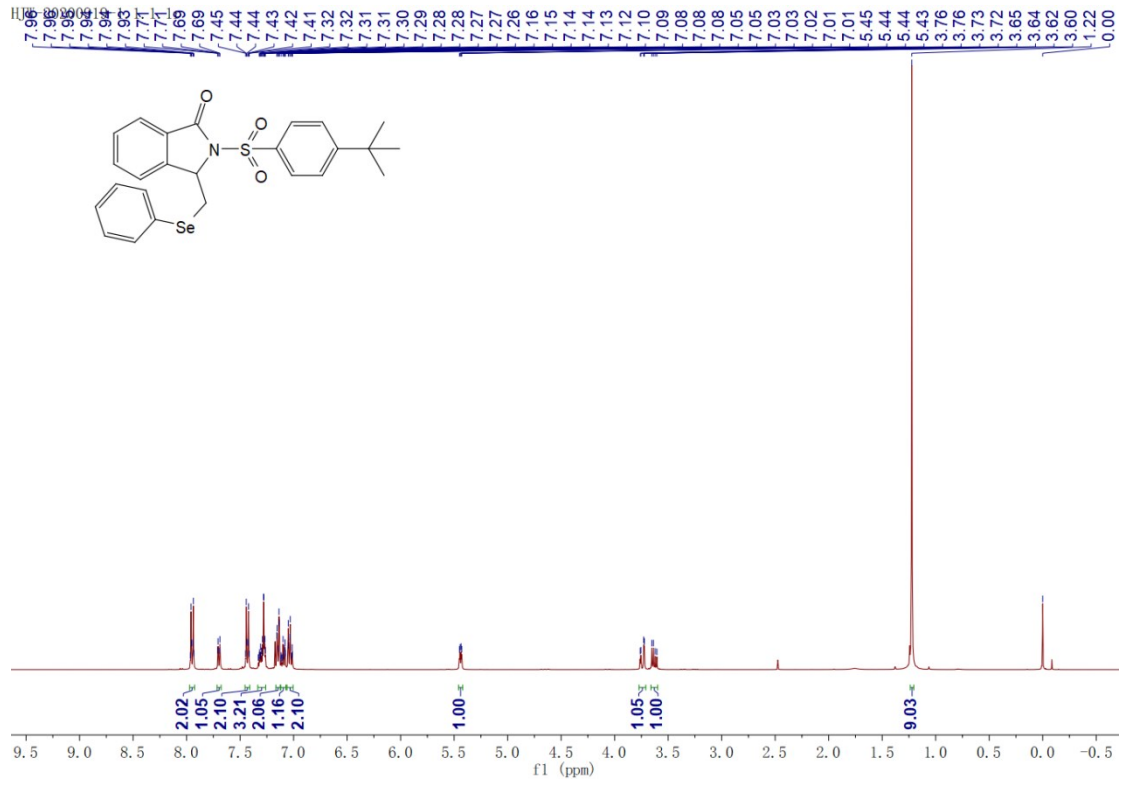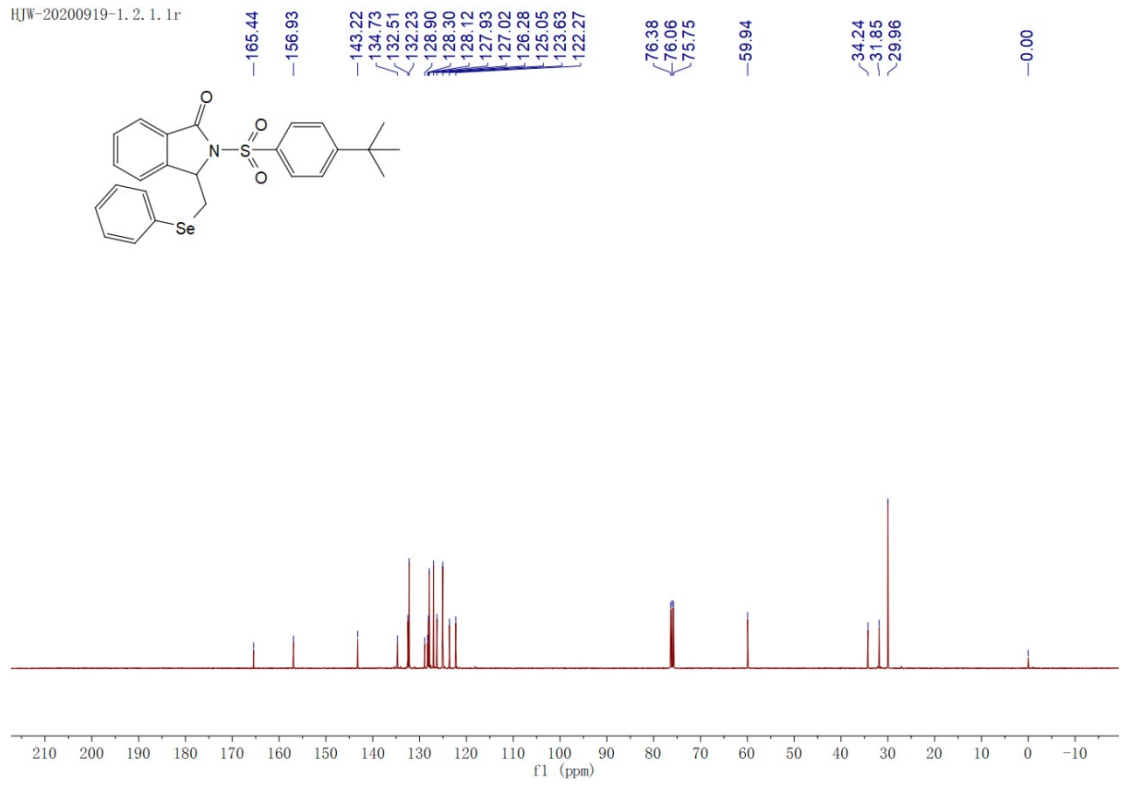

Product 4c

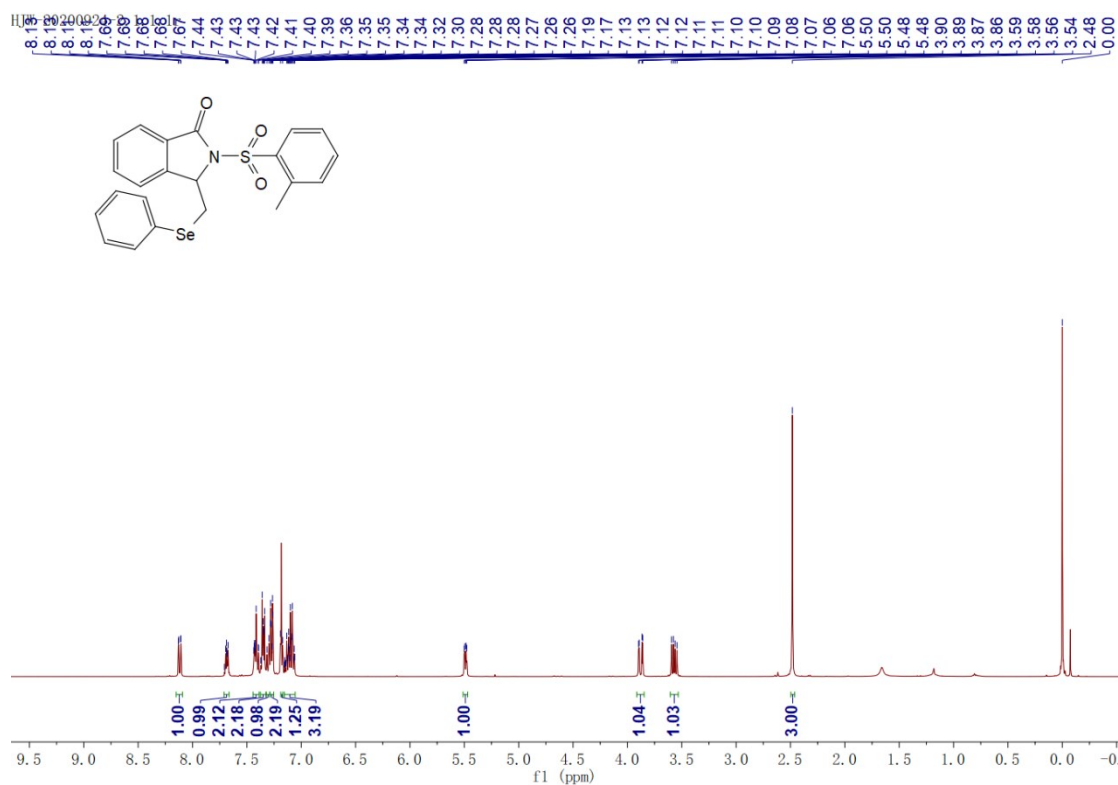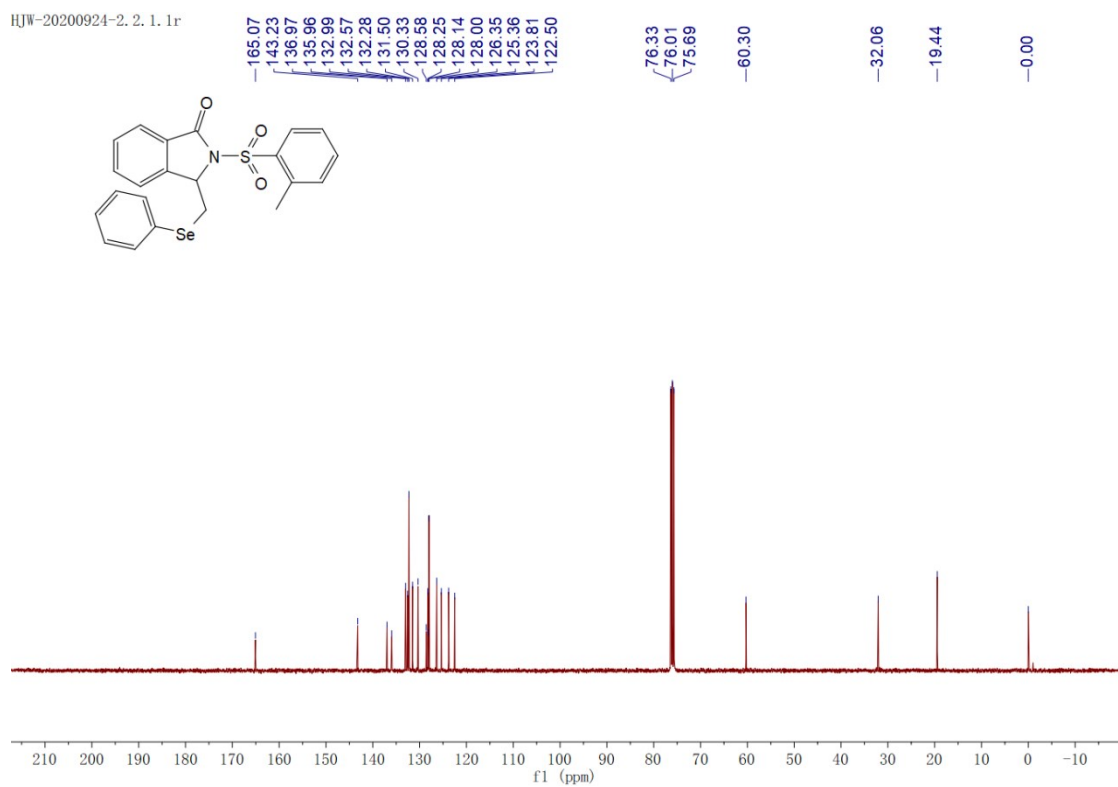

Product 4d

8.07  
8.06  
8.06  
8.06  
8.04  
7.77  
7.71  
7.57  
7.57  
7.55  
7.54  
7.47  
7.45  
7.44  
7.36  
7.35  
7.34  
7.33  
7.32  
7.32  
7.31  
7.29  
7.28  
7.15  
7.13  
7.13  
7.12  
7.10  
7.10  
7.06  
7.04  
7.02  
5.48  
5.47  
5.46  
5.45  
3.75  
3.75  
3.72  
3.71  
3.67  
3.65  
3.62

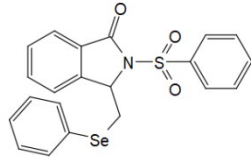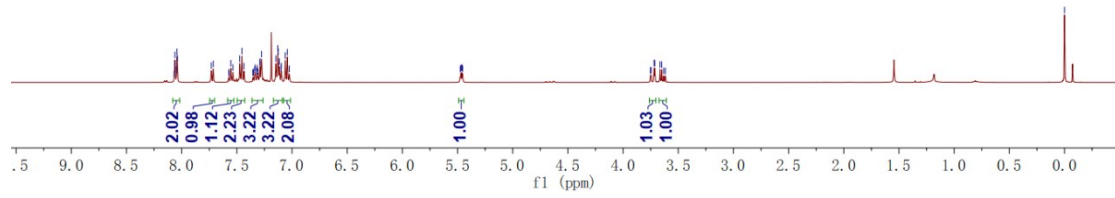

HJW-20201009-3.2.1.1r

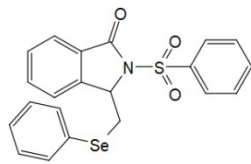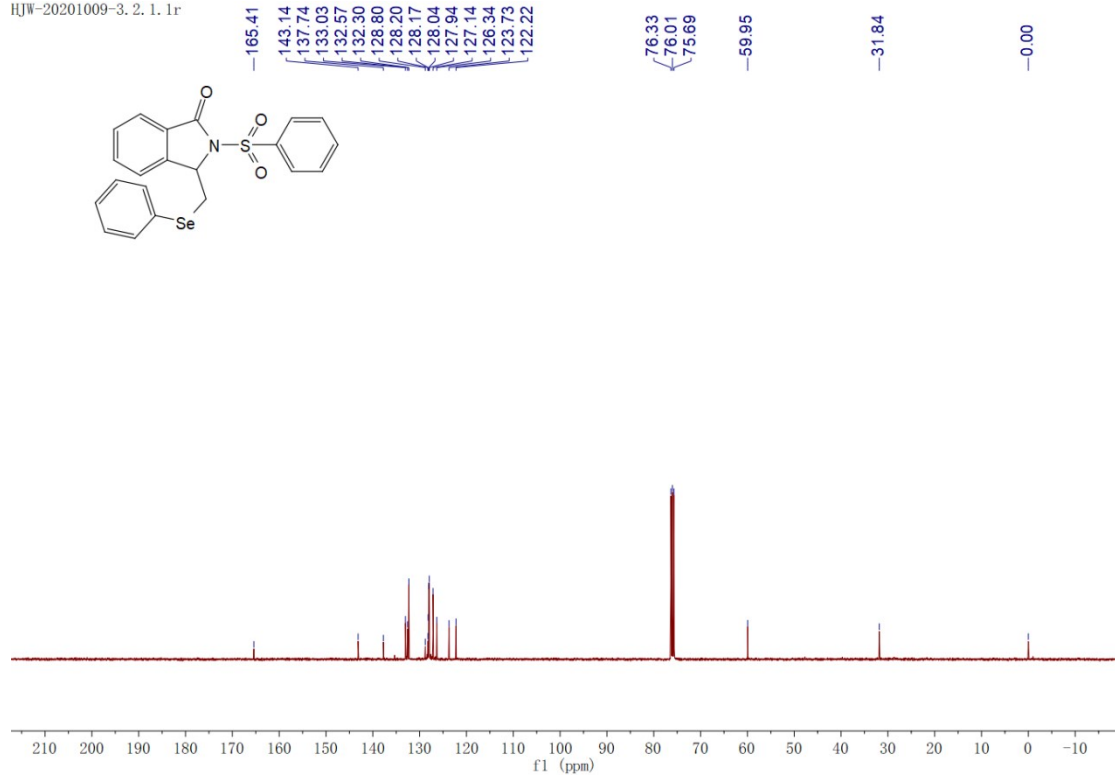



Product 4e

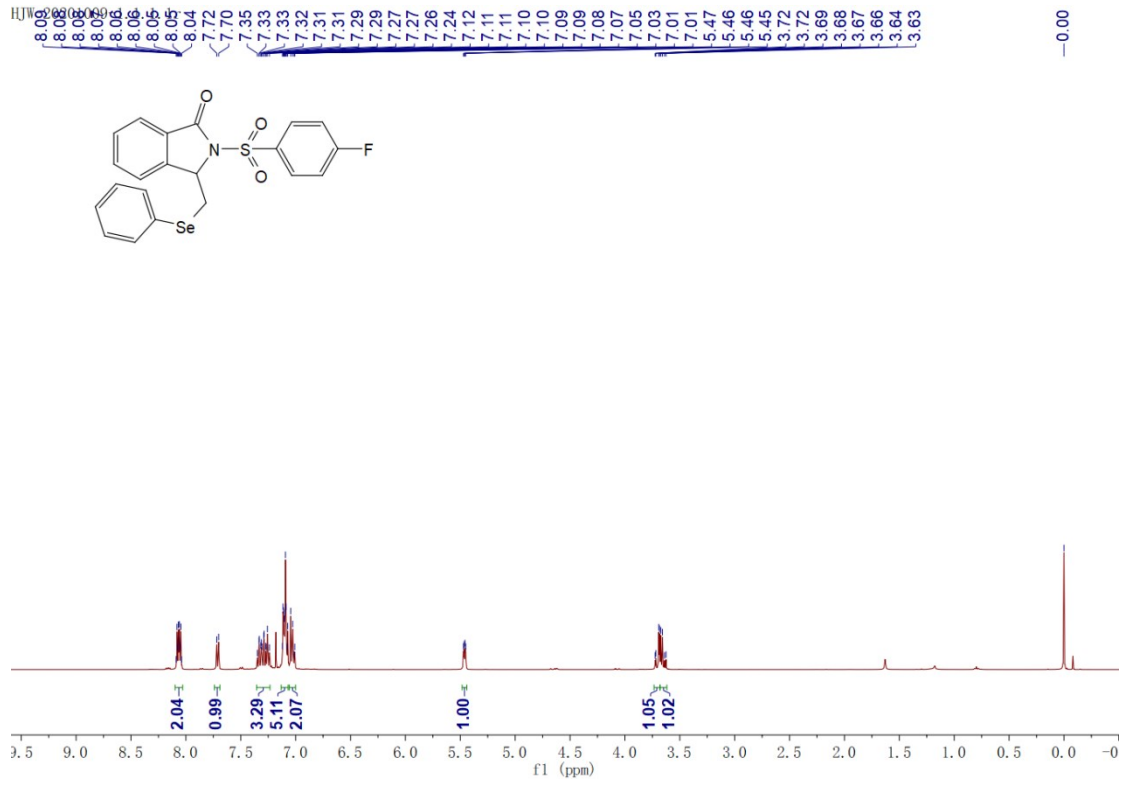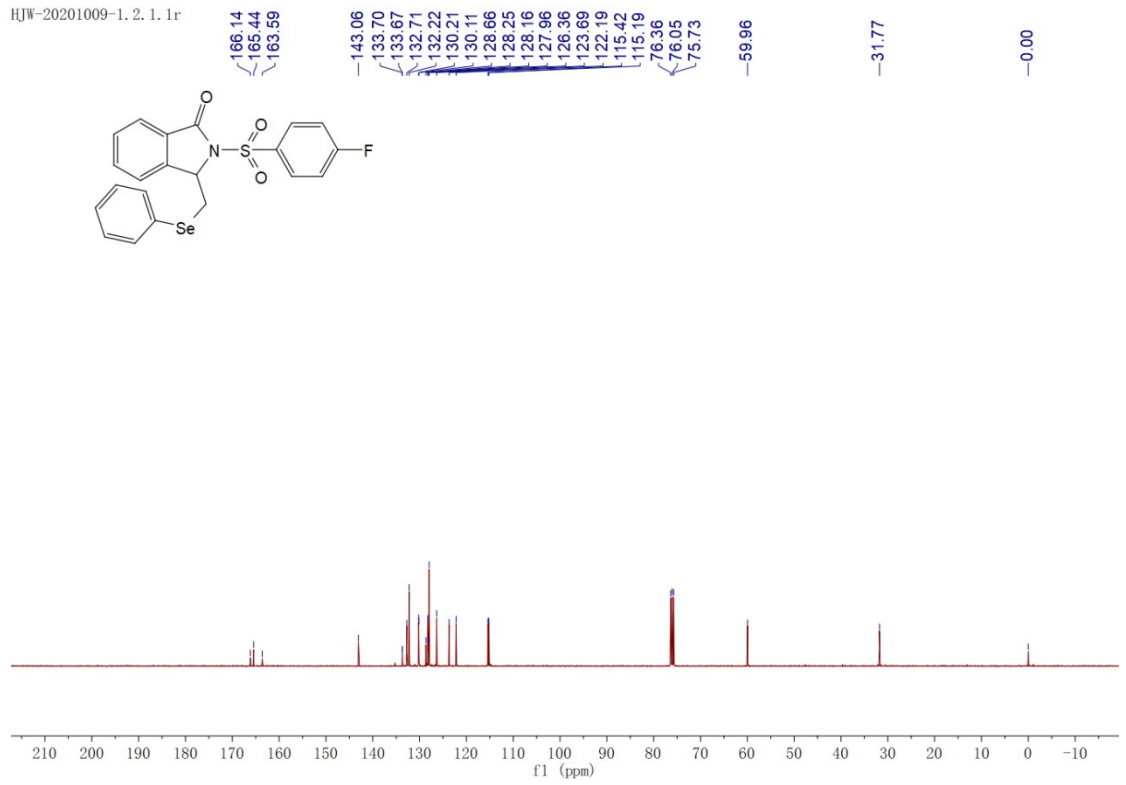

HJW-20201009-1.3.1.1r

--102.52

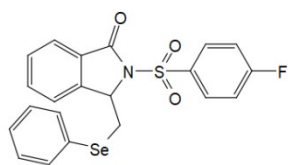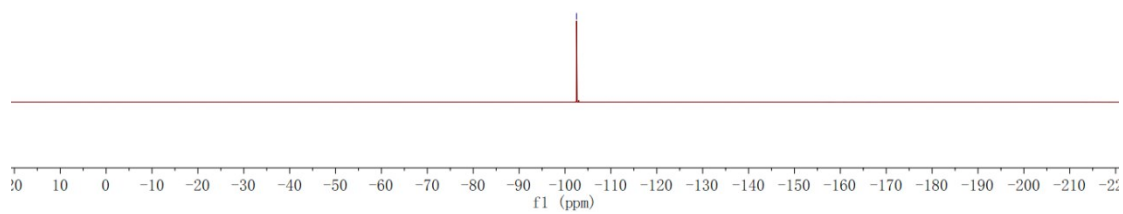

Product 4f

HJW-20201020-1.

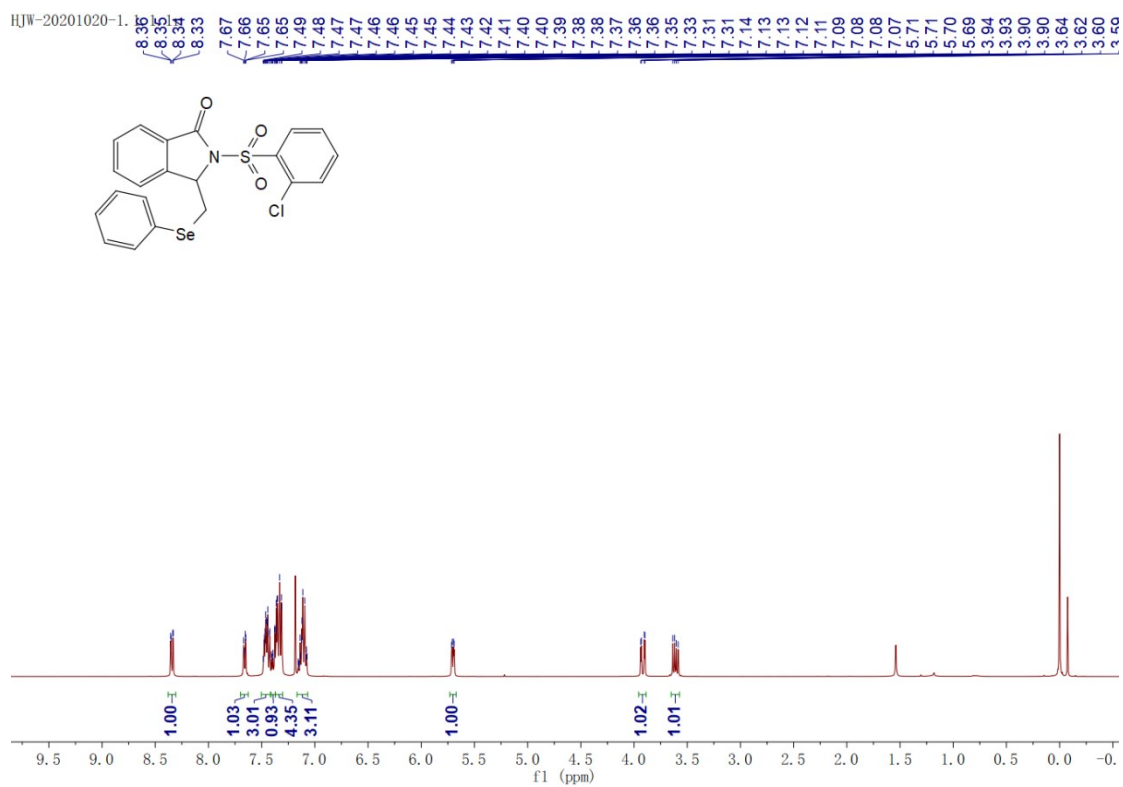

HJW-20201020-1. 2. 1. 1r

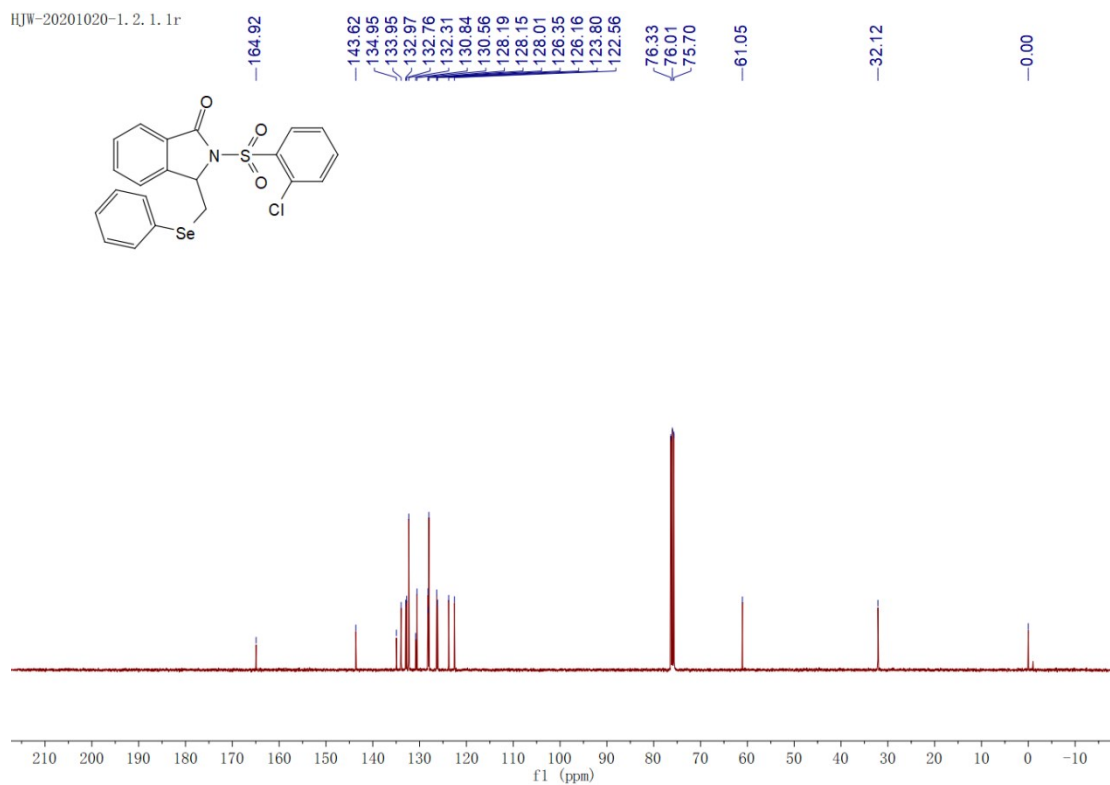

Product 4g

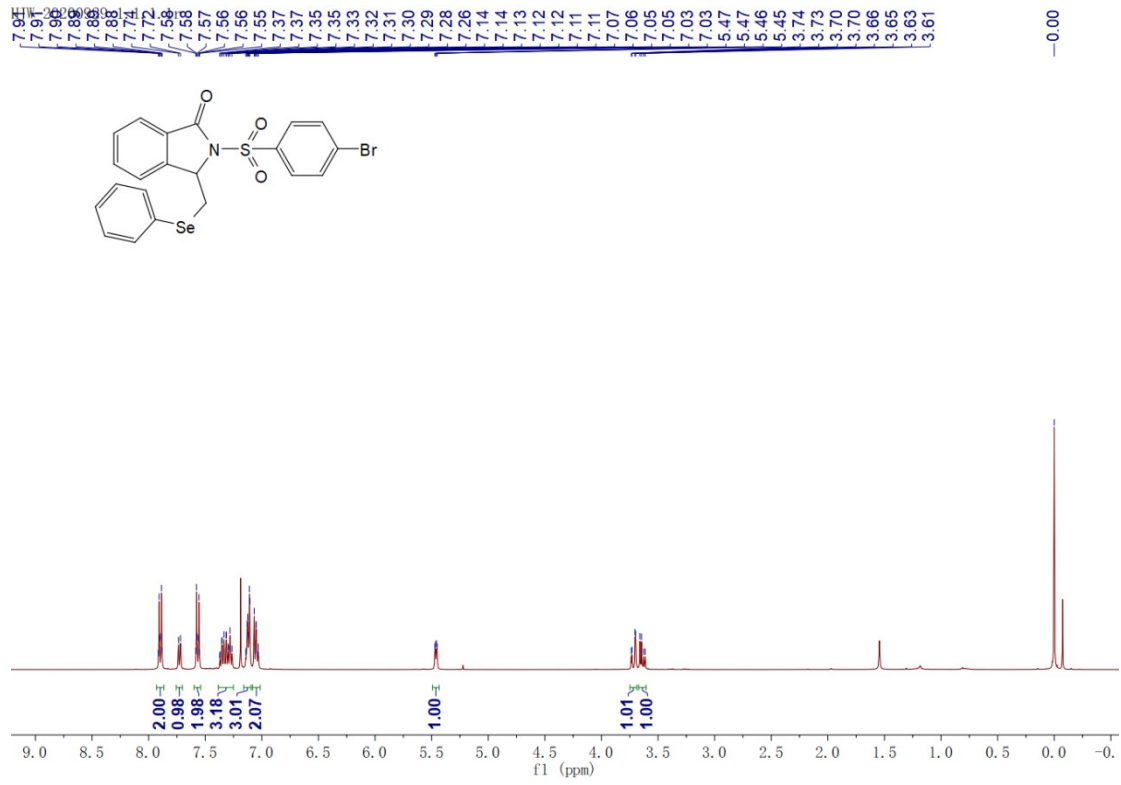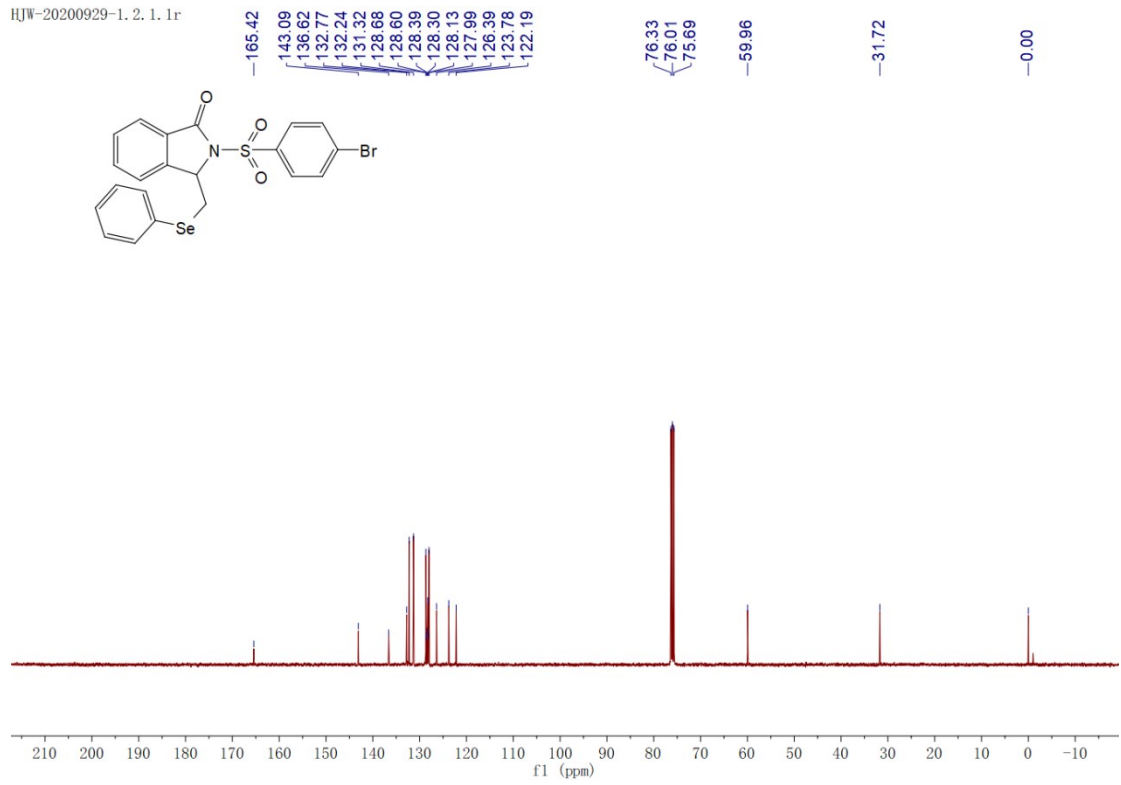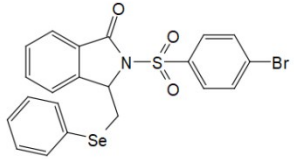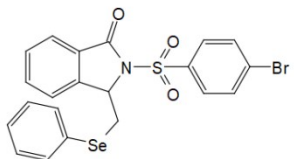

Product 4h

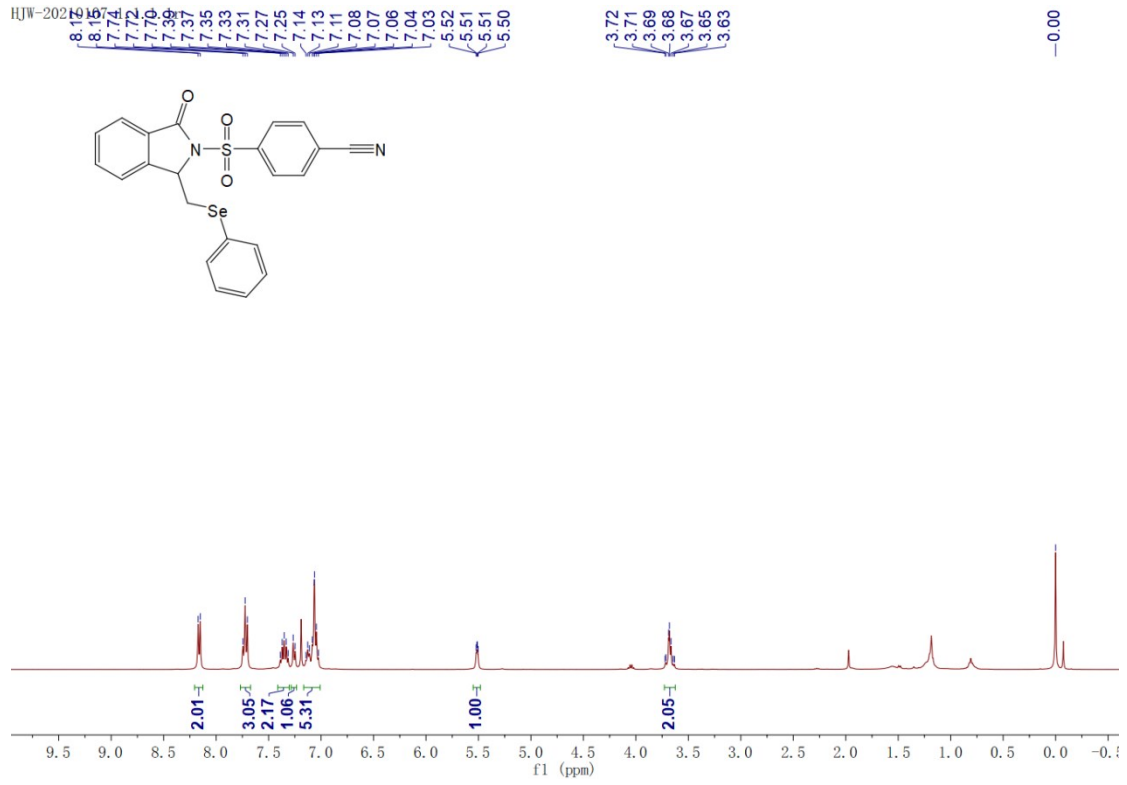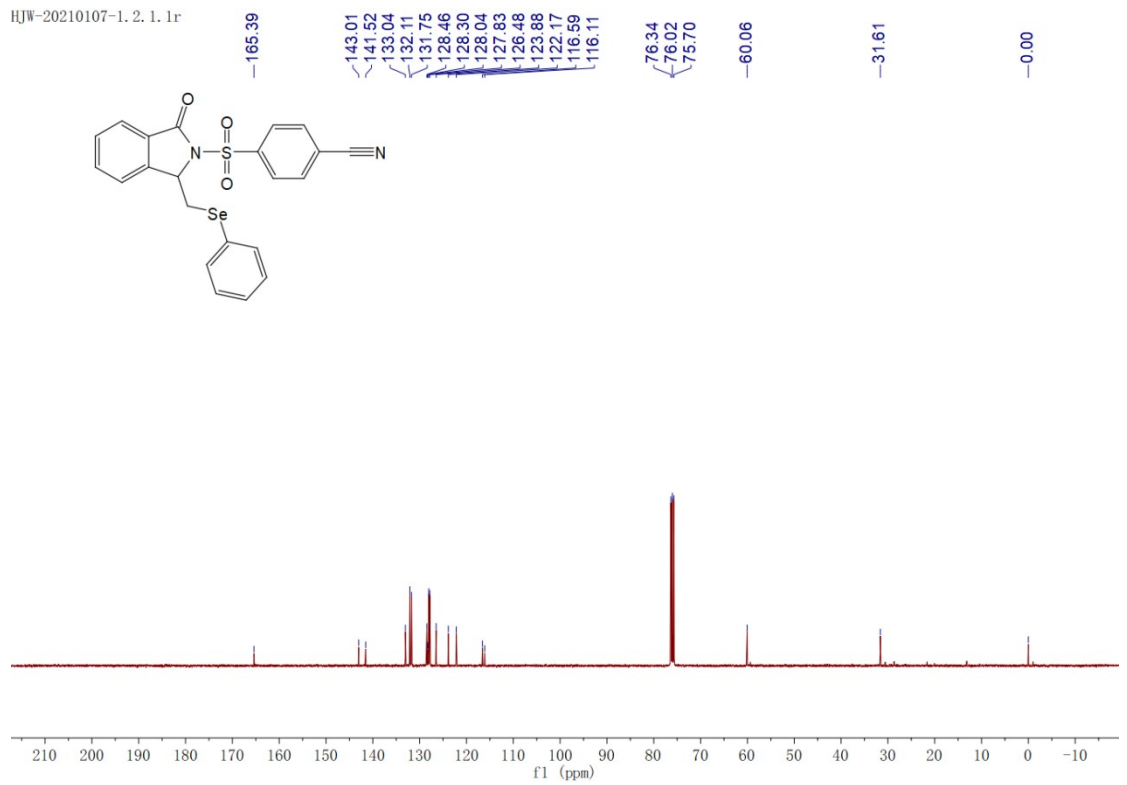

Product 4i

HJW-20210101-2-1.1.1r

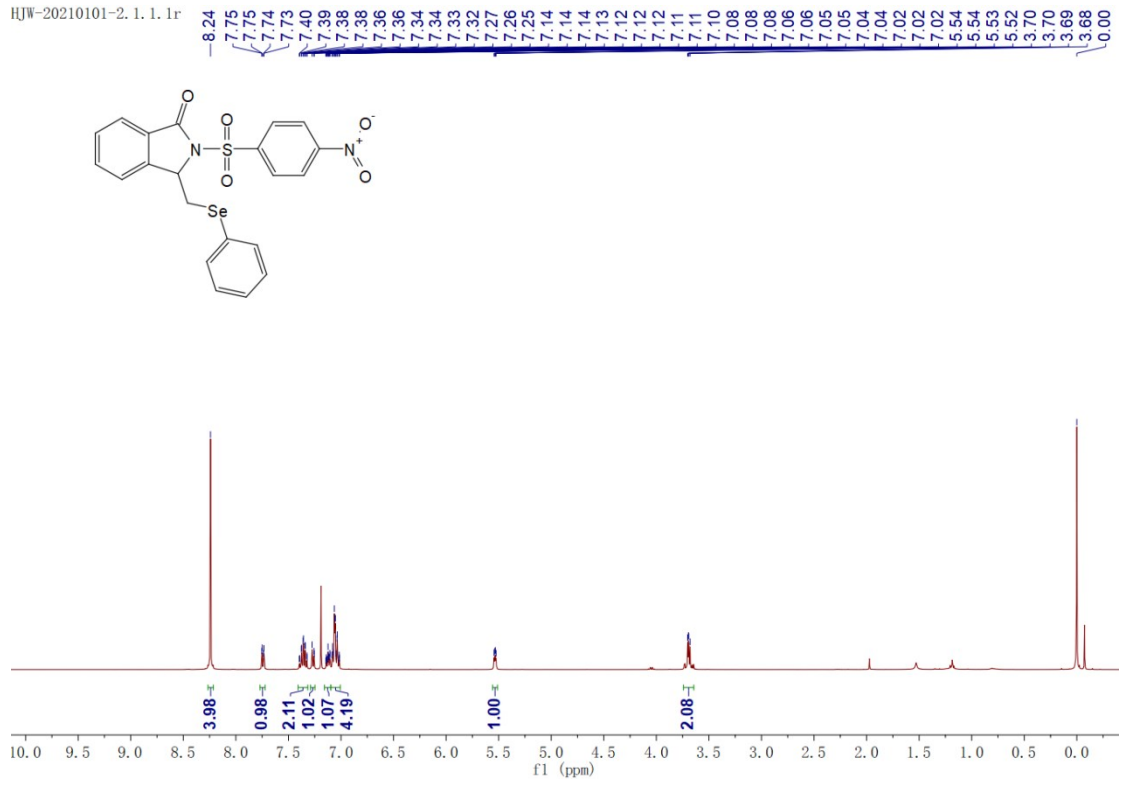

HJW-20210101-2-2.1.1.1r

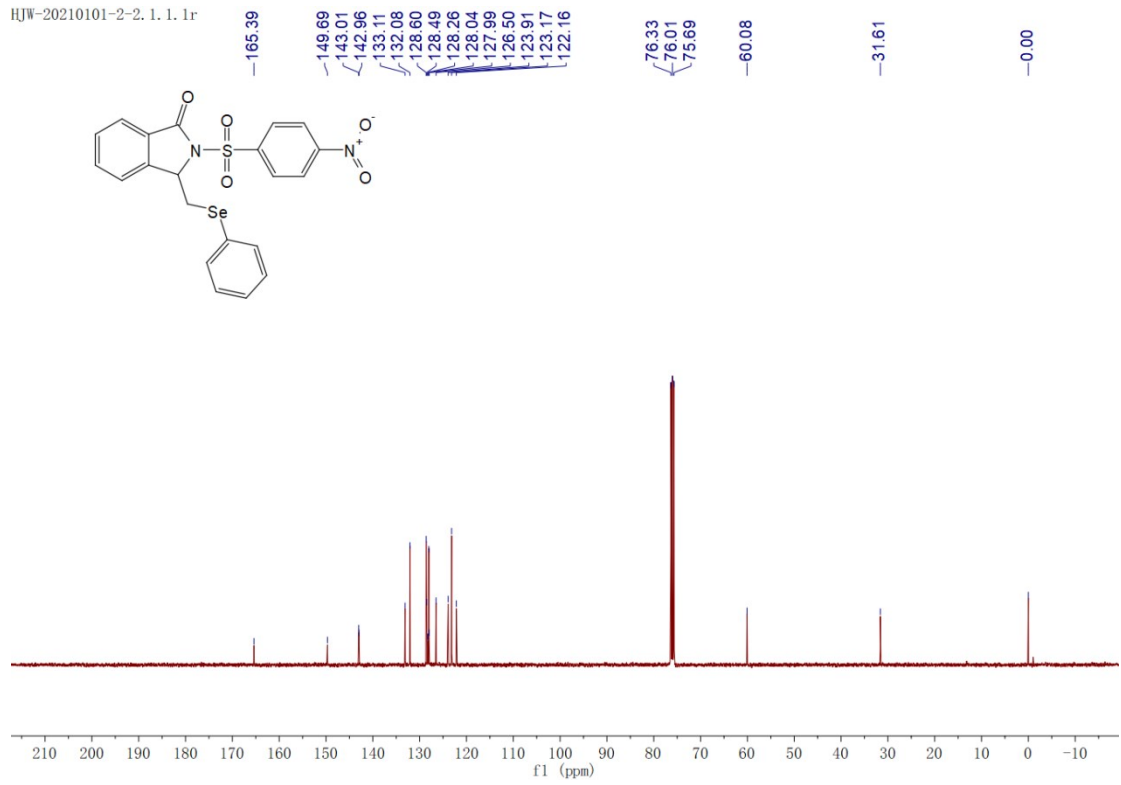

# Product 4j

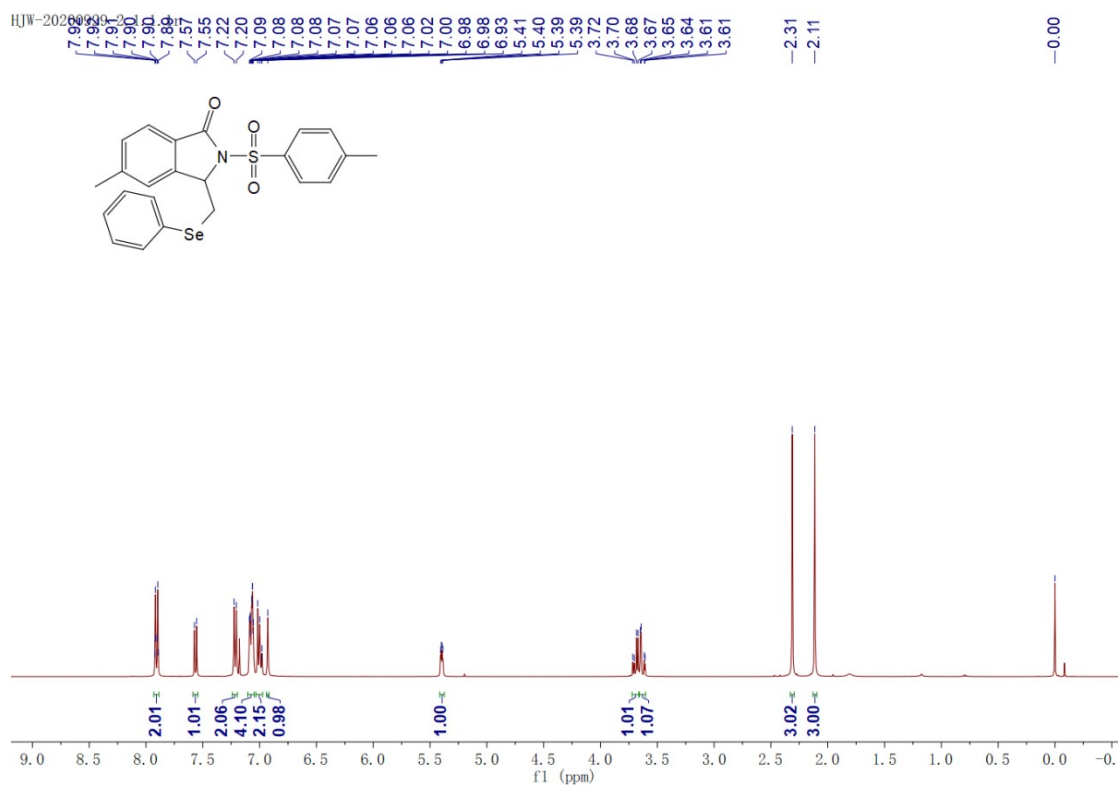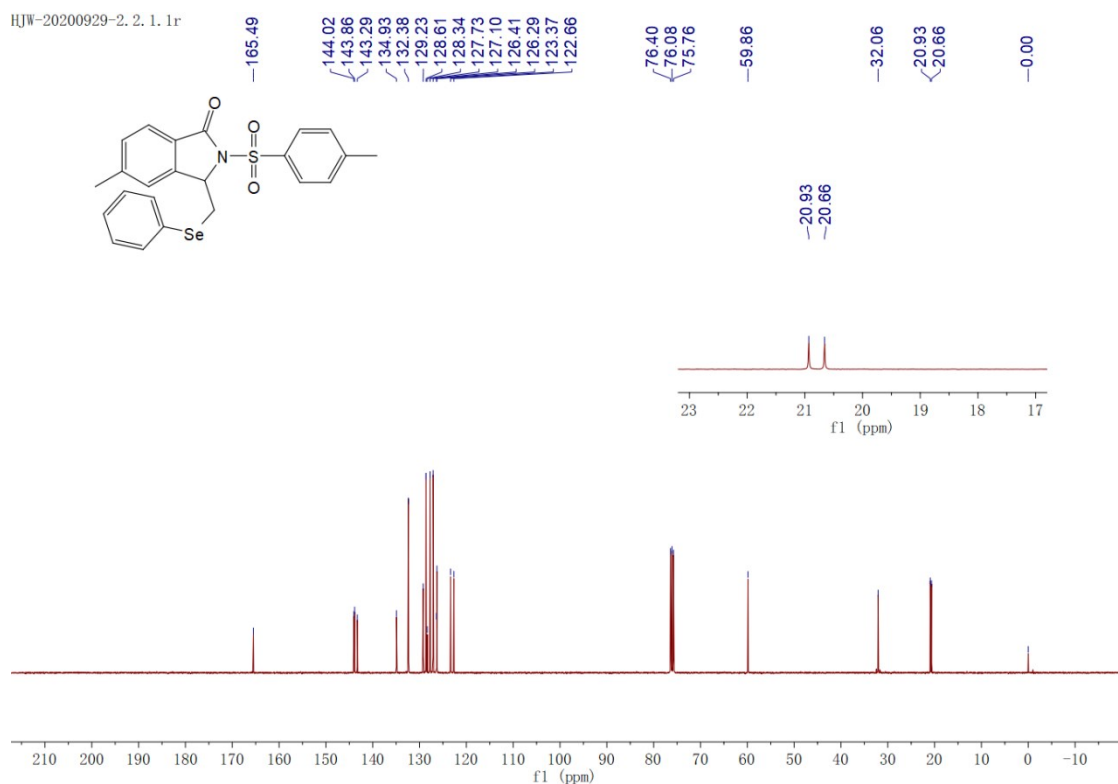

Product 4k

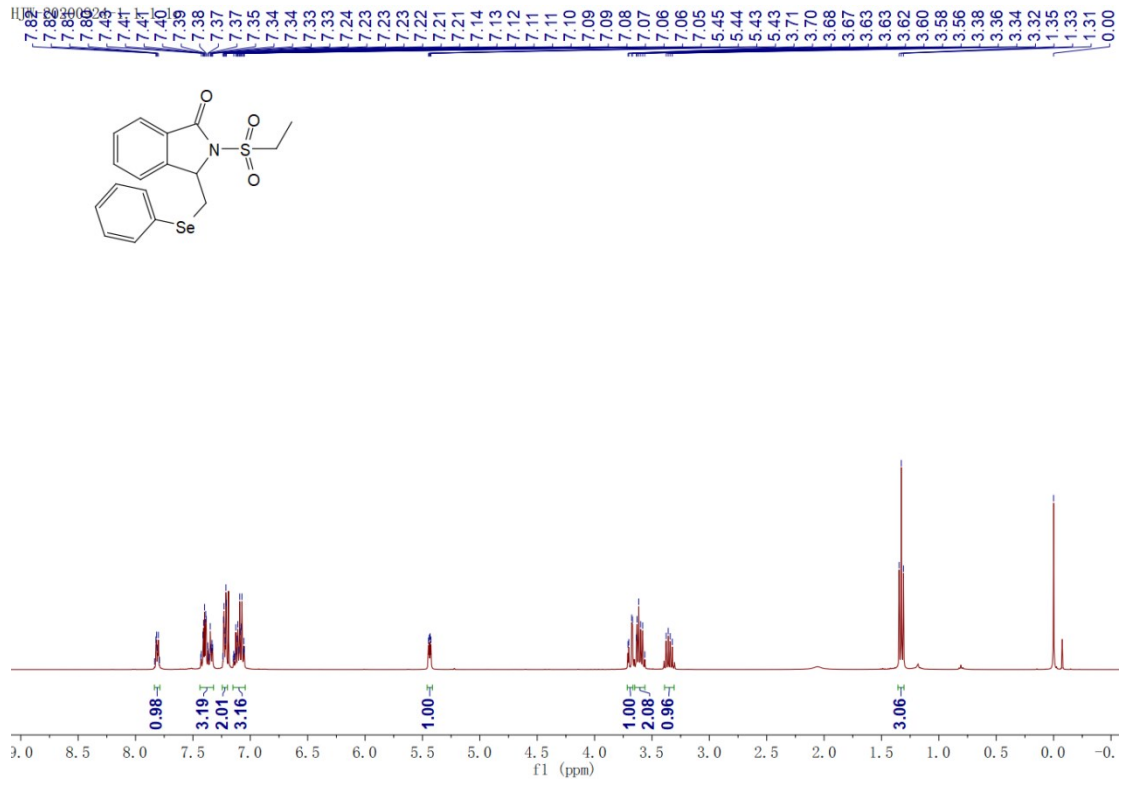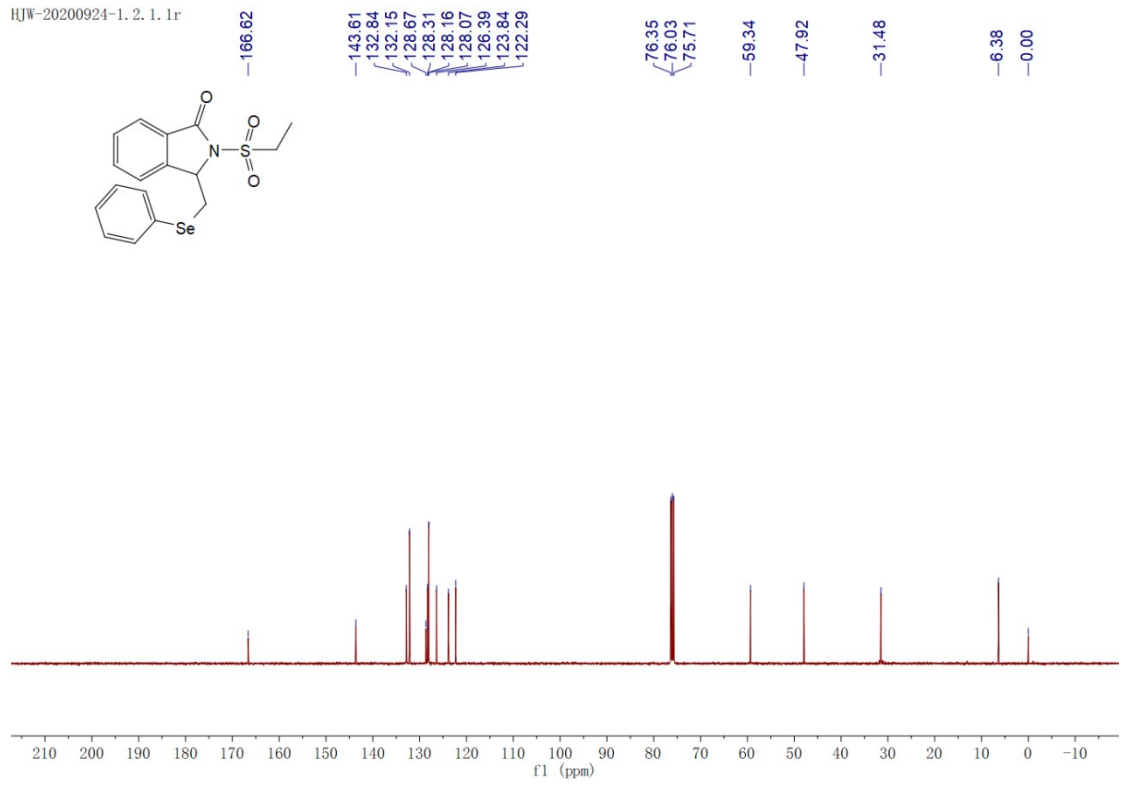



Product 5

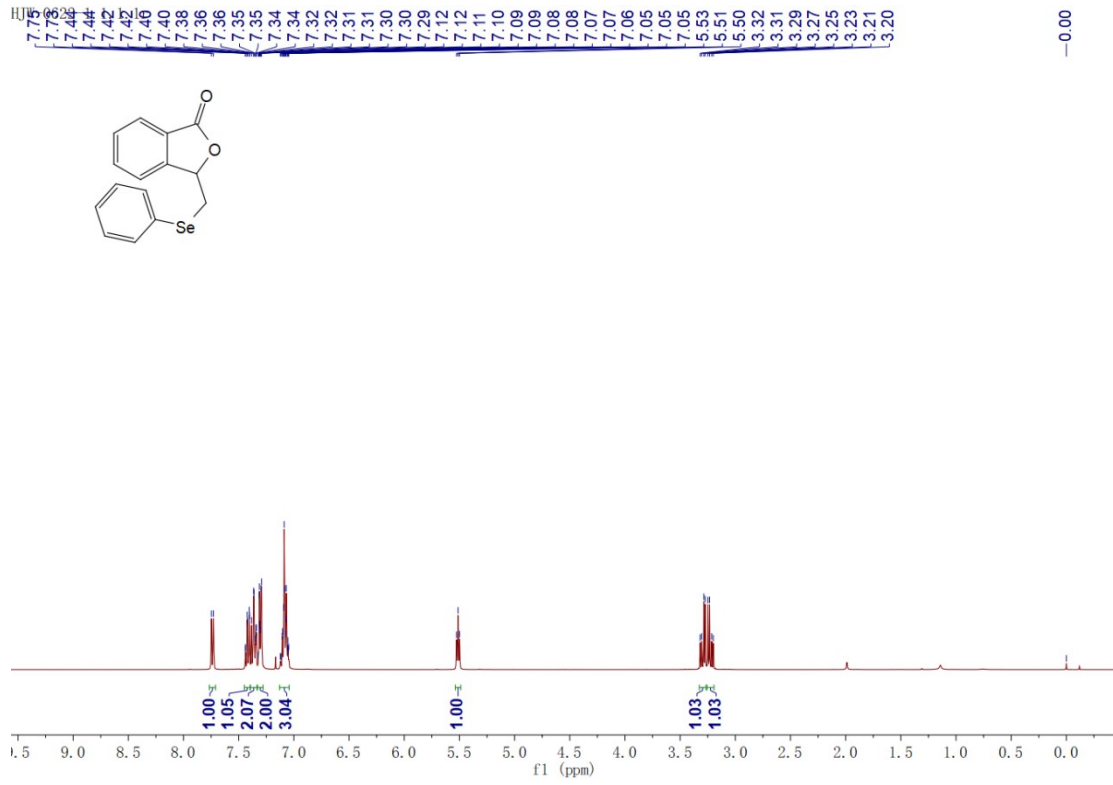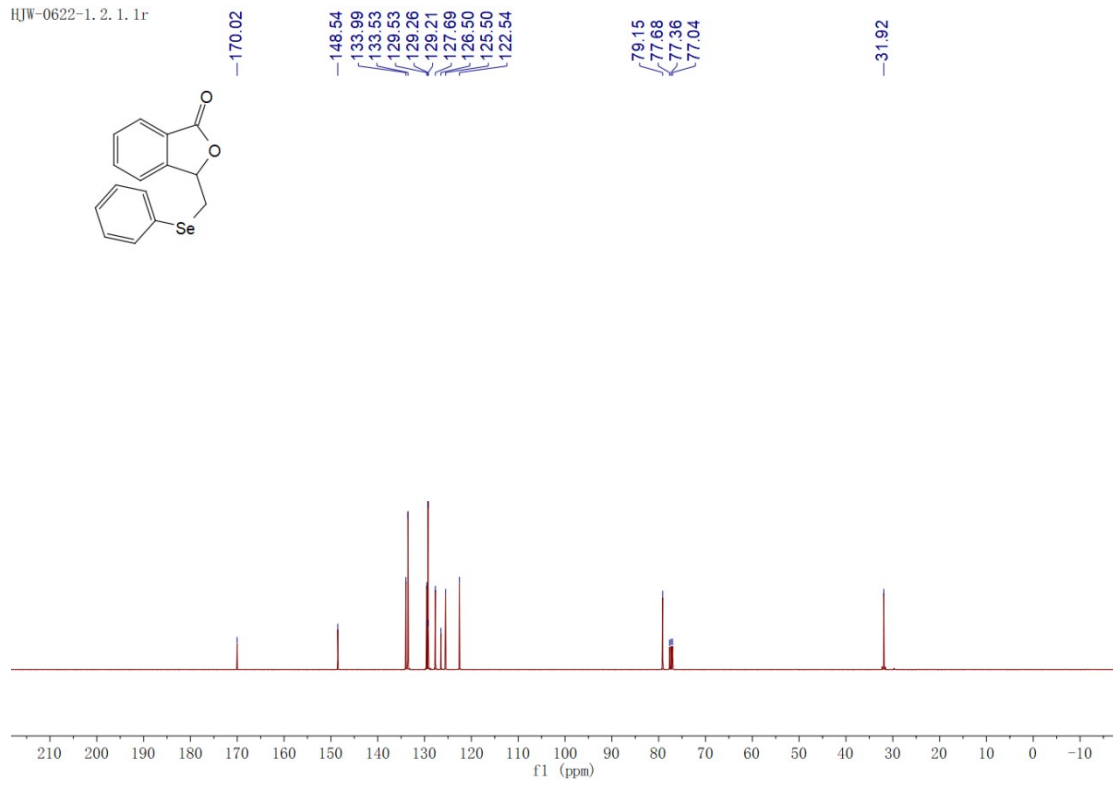

Supplement: d0cy02273j1.pdf [file d0cy02273j1.pdf]
